# Effect of Interpopulation Spike-Timing-Dependent Plasticity on Synchronized Rhythms in Neuronal Networks with Inhibitory and Excitatory Populations

Sang-Yoon Kim\* and Woosung Lim†

*Institute for Computational Neuroscience and Department of Science Education,  
Daegu National University of Education, Daegu 42411, Korea*

We consider clustered small-world networks with both inhibitory (I) and excitatory (E) populations. This I-E neuronal network has adaptive dynamic I to E and E to I interpopulation synaptic strengths, governed by interpopulation spike-timing-dependent plasticity (STDP) (i.e., I to E inhibitory STDP and E to I excitatory STDP). In previous works without STDPs, fast sparsely synchronized rhythms, related to diverse cognitive functions, were found to appear in a range of noise intensity  $D$  for static synaptic strengths. Here, by varying  $D$ , we investigate the effect of interpopulation STDPs on diverse population and individual properties of fast sparsely synchronized rhythms that emerge in both the I- and the E-populations. Depending on values of  $D$ , long-term potentiation (LTP) and long-term depression (LTD) for population-averaged values of saturated interpopulation synaptic strengths are found to occur, and they make effects on the degree of fast sparse synchronization. In a broad region of intermediate  $D$ , the degree of good synchronization (with higher spiking measure) becomes decreased, while in a region of large  $D$ , the degree of bad synchronization (with lower spiking measure) gets increased. Consequently, in each I- or E-population, the synchronization degree becomes nearly the same in a wide range of  $D$  (including both the intermediate and the large  $D$  regions). This kind of “equalization effect” is found to occur via cooperative interplay between the average occupation and pacing degrees of fast sparsely synchronized rhythms. We note that the equalization effect in interpopulation synaptic plasticity is distinctly in contrast to the Matthew (bipolarization) effect in intrapopulation (I to I and E to E) synaptic plasticity where good (bad) synchronization gets better (worse). Finally, emergences of LTP and LTD of interpopulation synaptic strengths are intensively investigated via a microscopic method based on the distributions of time delays between the pre- and the post-synaptic spike times.

PACS numbers: 87.19.lw, 87.19.lm, 87.19.lc

Keywords: Equalization Effect, Interpopulation Spike-Timing-Dependent Plasticity, Fast Sparsely Synchronized Rhythm, Inhibitory and Excitatory Populations

## I. INTRODUCTION

Recently, much attention has been paid to brain rhythms that emerge via population synchronization between individual firings in neuronal networks [1–15]. In particular, we are concerned about fast sparsely synchronized rhythms, associated with diverse cognitive functions (e.g., multisensory feature binding, selective attention, and memory formation) [16]. Fast sparsely synchronous oscillations [e.g., gamma rhythm (30–80 Hz) during awake behaving states and rapid eye movement sleep] have been observed in local field potential recordings, while at the cellular level individual neuronal recordings have been found to exhibit stochastic and intermittent spike discharges like Geiger counters at much lower rates than the population oscillation frequency [17–20]. Hence, single-cell firing activity differs distinctly from the population oscillatory behavior. These fast sparsely synchronized rhythms are in contrast to fully synchronized rhythms where individual neurons fire regularly like clocks at the population oscillation frequency.

Recordings of local field potentials in the neocortex

and the hippocampus in vivo often do not exhibit prominent field oscillations, along with irregular firings of single cells at low frequencies (as shown in their Poisson-like histograms of interspike intervals [21–24]). Hence, these asynchronous irregular states show stationary global activity and irregular single-cell firings with low frequencies [25–27]. However, prominent oscillations of local field potentials (corresponding to gamma rhythms) were observed in the hippocampus, the neocortex, the cerebellum, and the olfactory system [17–20, 28–43]. We note that, even when recorded local field potentials exhibit fast synchronous oscillations, spike trains of single cells are still highly irregular and sparse [17–20]. For example, Csicsvari et al. [17] observed that hippocampal pyramidal cells and interneurons fire irregularly at lower rates ( $\sim 1.5$  Hz for pyramidal cells and  $\sim 15$  Hz for interneurons) than the population frequency of global gamma oscillation. In this work, we are concerned about such fast sparsely synchronized rhythms which exhibit oscillatory global activity and stochastic and sparse single-cell firings.

Fast sparse synchronization was found to emerge under balance between strong external noise and strong recurrent inhibition in single-population networks of purely inhibitory interneurons and also in two-population networks of both inhibitory interneurons and excitatory pyramidal cells [16, 27, 44–48]. In neuronal networks,

---

\*Electronic address: [sykim@icn.re.kr](mailto:sykim@icn.re.kr)

†Electronic address: [wclim@icn.re.kr](mailto:wclim@icn.re.kr)

architecture of synaptic connections has been found to have complex topology which is neither regular nor completely random [49–56]. In recent works [57–59], we studied the effects of network architecture on emergence of fast sparse synchronization in small-world, scale-free, and clustered small-world complex networks with sparse connections, consisting of inhibitory interneurons. In these works, synaptic coupling strengths were static. However, in real brains synaptic strengths may vary for adjustment to the environment. Thus, synaptic strengths may be potentiated [60–62] or depressed [63–66]. These adaptations of synapses are called the synaptic plasticity which provides the basis for learning, memory, and development [67]. Here, we consider spike-timing-dependent plasticity (STDP) for the synaptic plasticity [68–75]. For the STDP, the synaptic strengths change through an update rule depending on the relative time difference between the pre- and the post-synaptic spike times. Recently, effects of STDP on diverse types of synchronization in populations of coupled neurons were studied in various aspects [76–82]. Particularly, effects of inhibitory STDP (at inhibitory to inhibitory synapses) on fast sparse synchronization have been investigated in small-world networks of inhibitory fast spiking interneurons [83].

Synaptic plasticity at excitatory and inhibitory synapses is of great interest because it controls the efficacy of potential computational functions of excitation and inhibition. Studies of synaptic plasticity have been mainly focused on excitatory synapses between pyramidal cells, since excitatory-to-excitatory (E to E) synapses are most prevalent in the cortex and they form a relatively homogeneous population [84–90]. A Hebbian time window was used for the excitatory STDP (eSTDP) update rule [68–75]. When a pre-synaptic spike precedes (follows) a post-synaptic spike, long-term potentiation (LTP) [long-term depression (LTD)] occurs. In contrast, synaptic plasticity at inhibitory synapses has attracted less attention mainly due to experimental obstacles and diversity of interneurons [91–95]. With the advent of fluorescent labeling and optical manipulation of neurons according to their genetic types [96, 97], inhibitory synaptic plasticity has also begun to be focused. Particularly, studies on inhibitory STDP (iSTDP) at inhibitory-to-excitatory (I to E) synapses have been much made. Thus, iSTDP has been found to be diverse and cell-specific [91–95, 98–104].

In this paper, we consider clustered small-world networks with both inhibitory (I) and excitatory (E) populations. The inhibitory small-world network consists of fast spiking interneurons, the excitatory small-world network is composed of regular spiking pyramidal cells, and random uniform connections are made between the two populations. By taking into consideration interpopulation STDPs between the I- and E-populations, we investigate their effects on diverse properties of population and individual behaviors of fast sparsely synchronized rhythms by varying the noise intensity  $D$  in the combined case of both I to E iSTDP and E to I eSTDP. A

time-delayed Hebbian time window is employed for the I to E iSTDP update rule, while an anti-Hebbian time window is used for the E to I eSTDP update rule. We note that our present work is in contrast to previous works on fast sparse synchronization where STDPs were not considered in most cases [27, 44–48] and only in one case [83], intrapopulation I to I iSTDP was considered in an inhibitory small-world network of fast spiking interneurons.

In the presence of interpopulation STDPs, interpopulation synaptic strengths  $\{J_{ij}^{(XY)}\}$  between the source  $Y$ -population and the target  $X$ -population are evolved into saturated limit values  $\{J_{ij}^{(XY)*}\}$  after a sufficiently long time of adjustment. Depending on  $D$ , mean values  $\langle J_{ij}^{(XY)*} \rangle$  of saturated limit values are potentiated [long-term potentiation (LTP)] or depressed [long-term depression (LTD)], in comparison with the initial mean value  $J_0^{(XY)}$ . These LTP and LTD make effects on the degree of fast sparse synchronization. In the case of I to E iSTDP, LTP (LTD) disfavors (favors) fast sparse synchronization [i.e., LTP (LTD) tends to decrease (increase) the degree of fast sparse synchronization] due to increase (decrease) in the mean value of I to E synaptic inhibition. On the other hand, the roles of LTP and LTD are reversed in the case of E to I eSTDP. In this case, LTP (LTD) favors (disfavors) fast sparse synchronization [i.e., LTP (LTD) tends to increase (decrease) the degree of fast sparse synchronization] because of increase (decrease) in the mean value of E to I synaptic excitation.

Due to the effects of the mean (LTP or LTD), an “equalization effect” in interpopulation (both I to E and E to I) synaptic plasticity is found to emerge in a wide range of  $D$  through cooperative interplay between the average occupation and pacing degrees of spikes in fast sparsely synchronized rhythms. In a broad region of intermediate  $D$ , the degree of good synchronization (with higher spiking measure) becomes decreased, while in a region of large  $D$  the degree of bad synchronization (with lower spiking measure) gets increased. Consequently, the degree of fast sparse synchronization becomes nearly the same in a wide range of  $D$ . This equalization effect may be well visualized in the histograms for the spiking measures in the absence and in the presence of interpopulation STDPs. The standard deviation from the mean in the histogram in the case of interpopulation STDPs is much smaller than that in the case without STDP, which clearly shows emergence of the equalization effect. In addition, a dumbing-down effect in interpopulation synaptic plasticity also occurs, because the mean in the histogram in the presence of interpopulation STDPs is smaller than that in the absence of STDP. Thus, equalization effect occurs together with dumbing-down effect. We also note that this kind of equalization effect in interpopulation synaptic plasticity is distinctly in contrast to the Matthew (bipolarization) effect in intrapopulation (I to I and E to E) synaptic plasticity where good (bad) synchronization gets better (worse) [80, 83].

Emergences of LTP and LTD of interpopulation synaptic strengths are also investigated through a microscopic method, based on the distributions of time delays  $\{\Delta t_{ij}^{(XY)}\}$  between the nearest spiking times of the post-synaptic neuron  $i$  in the (target)  $X$ -population and the pre-synaptic neuron  $j$  in the (source)  $Y$ -population. We follow time evolutions of normalized histograms  $H(\Delta t_{ij}^{(XY)})$  in both cases of LTP and LTD. Because of the equalization effects, the two normalized histograms at the final (evolution) stage are nearly the same, which is in contrast to the case of intrapopulation STDPs where the two normalized histograms at the final stage are distinctly different due to the Matthew (bipolarization) effect.

This paper is organized as follows. In Sec. II, we describe clustered small-world networks composed of fast spiking interneurons (inhibitory small-world network) and regular spiking pyramidal cells (excitatory small-world network) with interpopulation STDPs. Then, in Sec. III the effect of interpopulation STDPs on fast sparse synchronization is investigated in the combined case of both I to E iSTDP and E to I eSTDP. Finally, we give summary and discussion in Sec. IV.

## II. CLUSTERED SMALL-WORLD NETWORKS COMPOSED OF BOTH I- AND E-POPULATIONS WITH INTERPOPULATION SYNAPTIC PLASTICITY

In this section, we describe our clustered small-world networks consisting of both I- and E-populations with interpopulation synaptic plasticity. A neural circuit in the brain cortex is composed of a few types of excitatory principal cells and diverse types of inhibitory interneurons. It is also known that interneurons make up about 20 percent of all cortical neurons, and exhibit diversity in their morphologies and functions [105]. Here, we consider clustered small-world networks composed of both I- and E-populations. Each I(E)-population is modeled as a directed Watts-Strogatz small-world network, consisting of  $N_I$  ( $N_E$ ) fast spiking interneurons (regular spiking pyramidal cells) equidistantly placed on a one-dimensional ring of radius  $N_I$  ( $N_E$ )/ $2\pi$  ( $N_E : N_I = 4 : 1$ ), and random uniform connections with the probability  $p_{inter}$  are made between the two inhibitory and excitatory small-world networks.

A schematic representation of the clustered small-world networks is shown in Fig. 1. The Watts-Strogatz inhibitory small-world network (excitatory small-world network) interpolates between a regular lattice with high clustering (corresponding to the case of  $p_{wiring} = 0$ ) and a random graph with short average path length (corresponding to the case of  $p_{wiring} = 1$ ) through random uniform rewiring with the probability  $p_{wiring}$  [106–108]. For  $p_{wiring} = 0$ , we start with a directed regular ring lattice with  $N_I$  ( $N_E$ ) nodes where each node is coupled to its first  $M_{syn}^{(I)}$  ( $M_{syn}^{(E)}$ ) neighbors [ $M_{syn}^{(I)}/2$  ( $M_{syn}^{(E)}/2$ ) on either

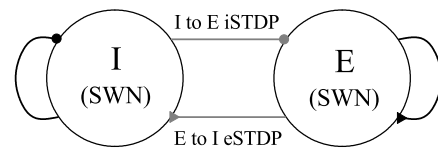

FIG. 1: Schematic representation of clustered small-world networks (SWNs) of the inhibitory (I) and the excitatory (E) populations with random interpopulation connections. Black curves with circle and triangle represent the I to I and the E to E intrapopulation connections, respectively. Gray lines with circle and triangle denote the I to E and the E to I interpopulation connections, respectively.

side] through outward synapses, and rewire each outward connection uniformly at random over the whole ring with the probability  $p_{wiring}$  (without self-connections and duplicate connections). Throughout the paper, we consider the case of  $p_{wiring} = 0.25$ . This kind of Watts-Strogatz small-world network model with predominantly local connections and rare long-range connections may be regarded as a cluster-friendly extension of the random network by reconciling the six degrees of separation (small-worldness) [109, 110] with the circle of friends (clustering).

As elements in the inhibitory small-world network (excitatory small-world network), we choose the Izhikevich inhibitory fast spiking interneuron (excitatory regular spiking pyramidal cell) model which is not only biologically plausible, but also computationally efficient [111–114]. Unlike Hodgkin-Huxley-type conductance-based models, instead of matching neuronal electrophysiology, the Izhikevich model matches neuronal dynamics by tuning its parameters. The parameters  $k$  and  $b$  are related to the neuron’s rheobase and input resistance, and  $a$ ,  $c$ , and  $d$  are the recovery time constant, the after-spike reset value of  $v$ , and the after-spike jump value of  $u$ , respectively. Tuning these parameters, the Izhikevich neuron model may produce 20 of the most prominent neuro-computational features of biological neurons [111–114]. In particular, the Izhikevich model is employed to reproduce the six most fundamental classes of firing patterns observed in the mammalian neocortex; (i) excitatory regular spiking pyramidal cells, (ii) inhibitory fast spiking interneurons, (iii) intrinsic bursting neurons, (iv) chattering neurons, (v) low-threshold spiking neurons, and (vi) late spiking neurons [113]. Here, we use the parameter values for the fast spiking interneurons and the regular spiking pyramidal cells in the layer 5 rat visual cortex, which are listed in the 1st item of Table I (see the captions of Figs. 8.12 and 8.27 in [113]).

The following equations (1)-(11) govern population dynamics in the clustered small-world networks with the I- and the E-populations:

TABLE I: Parameter values used in our computations; units of the capacitance, the potential, the current, and the time are pF, mV, pA, and msec, respectively.

|                                      |                                                                                                                                                  |                                    |                     |                                                             |                     |
|--------------------------------------|--------------------------------------------------------------------------------------------------------------------------------------------------|------------------------------------|---------------------|-------------------------------------------------------------|---------------------|
| (1)                                  | Single Izhikevich FS Interneurons [113]                                                                                                          |                                    |                     |                                                             |                     |
|                                      | $C_I = 20$                                                                                                                                       | $v_r^{(I)} = -55$                  | $v_t^{(I)} = -40$   | $v_p^{(I)} = 25$                                            | $v_b^{(I)} = -55$   |
|                                      | $k_I = 1$                                                                                                                                        | $a_I = 0.2$                        | $b_I = 0.025$       | $c_I = -45$                                                 | $d_I = 0$           |
| (2)                                  | Single Izhikevich RS Pyramidal Cells [113]                                                                                                       |                                    |                     |                                                             |                     |
|                                      | $C_E = 100$                                                                                                                                      | $v_r^{(E)} = -60$                  | $v_t^{(E)} = -40$   | $v_p^{(E)} = 35$                                            |                     |
|                                      | $k_E = 0.7$                                                                                                                                      | $a_E = 0.03$                       | $b_E = -2$          | $c_E = -50$                                                 | $d_E = 100$         |
| (3)                                  | Random External Excitatory Input to Each Izhikevich FS Interneurons and RS Pyramidal Cells                                                       |                                    |                     |                                                             |                     |
|                                      | $\bar{I}_i^{(I)} = \bar{I}_i^{(E)} = \bar{I}_i; \bar{I}_i \in [680, 720]$                                                                        |                                    |                     | $D_I = D_E = D$ : Varying                                   |                     |
| (4)                                  | Inhibitory Synapse Mediated by The GABA <sub>A</sub> Neurotransmitter [45]                                                                       |                                    |                     |                                                             |                     |
| I to I:                              | $\tau_l^{(II)} = 1.5$                                                                                                                            | $\tau_r^{(II)} = 1.5$              | $\tau_d^{(II)} = 8$ | $V_{syn}^{(I)} = -80$                                       |                     |
| I to E:                              | $\tau_l^{(EI)} = 1.5$                                                                                                                            | $\tau_r^{(EI)} = 1.5$              | $\tau_d^{(EI)} = 8$ |                                                             |                     |
| (5)                                  | Excitatory Synapse Mediated by The AMPA Neurotransmitter [45]                                                                                    |                                    |                     |                                                             |                     |
| E to E:                              | $\tau_l^{(EE)} = 1.5$                                                                                                                            | $\tau_r^{(EE)} = 0.4$              | $\tau_d^{(EE)} = 2$ | $V_{syn}^{(E)} = 0$                                         |                     |
| E to I:                              | $\tau_l^{(IE)} = 1.5$                                                                                                                            | $\tau_r^{(IE)} = 0.2$              | $\tau_d^{(IE)} = 1$ |                                                             |                     |
| (6)                                  | Intra- and Inter-population Synaptic Connections between Neurons in The Clustered Watts-Strogatz SWNs with Inhibitory and Excitatory Populations |                                    |                     |                                                             |                     |
| Intrapopulation Synaptic Connection: | $N_I = 600$                                                                                                                                      | $M_{syn}^{(I)} = 40$               | $N_E = 2400$        | $M_{syn}^{(E)} = 160$                                       | $p_{wiring} = 0.25$ |
| Interpopulation Synaptic Connection: | $p_{inter} = 1/15$                                                                                                                               |                                    |                     |                                                             |                     |
| Synaptic Strengthes:                 | $J_0^{(II)} = 1300$                                                                                                                              | $J_0^{(EE)} = 300$                 | $J_0^{(EI)} = 800$  | $J_0^{(IE)} = 487.5 (= J_0^{(II)} J_0^{(EE)} / J_0^{(IE)})$ |                     |
|                                      | $\sigma_0 = 5$                                                                                                                                   | $J_{ij}^{(EI)} \in [0.0001, 2000]$ |                     | $J_{ij}^{(IE)} \in [0.0001, 2000]$                          |                     |
| (7)                                  | Delayed Hebbian I to E iSTDP Rule                                                                                                                |                                    |                     |                                                             |                     |
|                                      | $\delta = 0.1$                                                                                                                                   | $A_+ = 0.4$                        | $A_- = 0.35$        | $\tau_+ = 2.6$                                              | $\tau_- = 2.8$      |
| (8)                                  | Anti-Hebbian E to I eSTDP Rule                                                                                                                   |                                    |                     |                                                             |                     |
|                                      | $\delta = 0.05$                                                                                                                                  | $A_+ = 1.0$                        | $A_- = 0.9$         | $\tau_+ = 15.0$                                             | $\tau_- = 15.0$     |

$$C_I \frac{dv_i^{(I)}}{dt} = k_I (v_i^{(I)} - v_r^{(I)}) (v_i^{(I)} - v_t^{(I)}) - u_i^{(I)} + \bar{I}_i^{(I)} + D_I \xi_i^{(I)} - I_{syn,i}^{(II)} - I_{syn,i}^{(IE)}, \quad (1)$$

$$\frac{du_i^{(I)}}{dt} = a_I \{U(v_i^{(I)}) - u_i^{(I)}\}, \quad i = 1, \dots, N_I, \quad (2)$$

$$C_E \frac{dv_i^{(E)}}{dt} = k_E (v_i^{(E)} - v_r^{(E)}) (v_i^{(E)} - v_t^{(E)}) - u_i^{(E)} + \bar{I}_i^{(E)} + D_E \xi_i^{(E)} - I_{syn,i}^{(EE)} - I_{syn,i}^{(EI)}, \quad (3)$$

$$\frac{du_i^{(E)}}{dt} = a_E \{U(v_i^{(E)}) - u_i^{(E)}\}, \quad i = 1, \dots, N_E, \quad (4)$$

with the auxiliary after-spike resetting:

$$\text{if } v_i^{(X)} \geq v_p^{(X)}, \text{ then } v_i^{(X)} \leftarrow c_X \text{ and } u_i^{(X)} \leftarrow u_i^{(X)} + d_X, \quad (X = I \text{ or } E) \quad (5)$$

where

$$U(v^{(I)}) = \begin{cases} 0 & \text{for } v^{(I)} < v_b^{(I)} \\ b_I (v^{(I)} - v_b^{(I)})^3 & \text{for } v^{(I)} \geq v_b^{(I)} \end{cases}, \quad (6)$$

$$U(v^{(E)}) = b_E (v^{(E)} - v_b^{(E)}), \quad (7)$$

$$I_{syn,i}^{(XX)}(t) = \frac{1}{d_{intra,i}^{(XX)}} \sum_{j=1(j \neq i)}^{N_X} J_{ij}^{(XX)} w_{ij}^{(XX)} s_j^{(XX)}(t) (v_i^{(X)} - V_{syn}^{(X)}), \quad (8)$$

$$I_{syn,i}^{(XY)}(t) = \frac{1}{d_{inter,i}^{(XY)}} \sum_{j=1}^{N_Y} J_{ij}^{(XY)} w_{ij}^{(XY)} s_j^{(XY)}(t) (v_i^{(X)} - V_{syn}^{(Y)}), \quad (9)$$



$$s_j^{(XY)}(t) = \sum_{f=1}^{F_j} E_{XY}(t - t_f^{(j)} - \tau_l^{(XY)}) \quad (X = Y \text{ or } X \neq Y); \quad (10)$$

$$E_{XY}(t) = \frac{1}{\tau_d^{(XY)} - \tau_r^{(XY)}} (e^{-t/\tau_d^{(XY)}} - e^{-t/\tau_r^{(XY)}}) \Theta(t). \quad (11)$$

Here, the state of the  $i$ th neuron in the  $X$ -population ( $X = I$  or  $E$ ) at a time  $t$  is characterized by two state variables: the membrane potential  $v_i^{(X)}$  and the recovery current  $u_i^{(X)}$ . In Eq. (1),  $C_X$  is the membrane capacitance,  $v_r^{(X)}$  is the resting membrane potential, and  $v_t^{(X)}$  is the instantaneous threshold potential. After the potential reaches its apex (i.e., spike cutoff value)  $v_p^{(X)}$ , the membrane potential and the recovery variable are reset according to Eq. (5). The units of the capacitance  $C_X$ , the potential  $v^{(X)}$ , the current  $u^{(X)}$  and the time  $t$  are pF, mV, pA, and msec, respectively. All these parameter values used in our computations are listed in Table I. More details on the random external input, the synaptic currents and plasticity, and the numerical method for integration of the governing equations are given in the following subsections.

### A. Random External Excitatory Input to Each Izhikevich Fast Spiking Interneuron and Regular Spiking Pyramidal Cell

Each neuron in the  $X$ -population ( $X = I$  or  $E$ ) receives stochastic external excitatory input  $I_{ext,i}^{(X)}$  from other brain regions, not included in the network (i.e., corresponding to background excitatory input) [27, 44–46]. Then,  $I_{ext,i}^{(X)}$  may be modeled in terms of its time-averaged constant  $\bar{I}_i^{(X)}$  and an independent Gaussian white noise  $\xi_i^{(X)}$  (i.e., corresponding to fluctuation of  $I_{ext,i}^{(X)}$  from its mean) [see the 3rd and the 4th terms in Eqs. (1) and (3)] satisfying  $\langle \xi_i^{(X)}(t) \rangle = 0$  and  $\langle \xi_i^{(X)}(t) \xi_j^{(X)}(t') \rangle = \delta_{ij} \delta(t - t')$ , where  $\langle \dots \rangle$  denotes the ensemble average. The intensity of the noise  $\xi_i^{(X)}$  is controlled by using the parameter  $D_X$ . For simplicity, we consider the case of  $\bar{I}_i^{(I)} = \bar{I}_i^{(E)} = \bar{I}_i$  and  $D_I = D_E = D$ .

Figure 2 shows spiking transitions for both the single Izhikevich fast spiking interneuron and regular spiking pyramidal cell in the absence of noise (i.e.,  $D = 0$ ). The fast spiking interneuron exhibits a jump from a resting state to a spiking state via subcritical Hopf bifurcation for  $\bar{I}_h^* \simeq 73.7$  by absorbing an unstable limit cycle born via a fold limit cycle bifurcation for  $\bar{I}_l^* \simeq 72.8$  [see Fig. 2(a)] [113]. Hence, the fast spiking interneuron shows type-II excitability because it begins to fire with a non-zero frequency, as shown in Fig. 2(b) [115, 116]. Throughout this paper, we consider a suprathreshold case such that the value of  $\bar{I}_i$  is chosen via uniform ran-

dom sampling in the range of [680,720], as shown in the 3rd item of Table I. At the middle value of  $\bar{I} = 700$ , the membrane potential  $v^{(I)}$  oscillates very fast with a mean firing rate  $f \simeq 271$  Hz [see Fig. 2(e)]. On the other hand, the regular spiking pyramidal cell shows a continuous transition from a resting state to a spiking state through a saddle-node bifurcation on an invariant circle for  $\bar{I}^* \simeq 51.5$ , as shown in Fig. 2(c) [113]. Hence, the regular spiking pyramidal cell exhibits type-I excitability because its frequency  $f$  increases continuously from 0 [see Fig. 2(d)]. For  $\bar{I} = 700$ , the membrane potential  $v^{(E)}$  oscillates with  $f \simeq 111$  Hz, as shown in Fig. 2(f). Hence,  $v^{(I)}(t)$  (of the fast spiking interneuron) oscillates about 2.4 times as fast as  $v^{(E)}(t)$  (of the regular spiking pyramidal cell) when  $\bar{I} = 700$ .

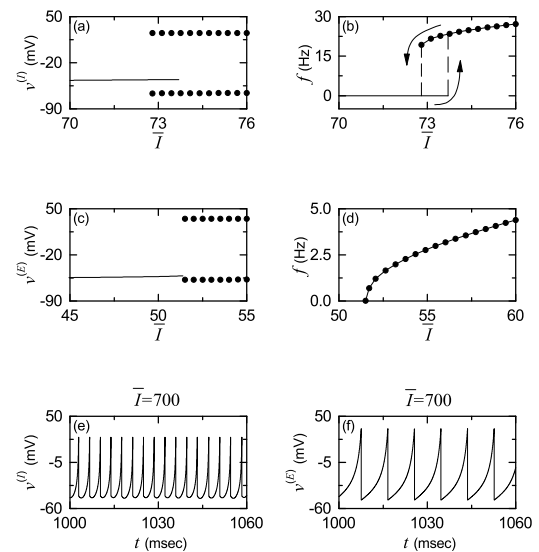

FIG. 2: Single Izhikevich fast spiking interneuron for  $D = 0$ : (a) bifurcation diagram and (b) plot of the mean firing rate  $f$  versus the time-averaged constant  $\bar{I}$  of the external input  $I_{ext}$ . Single Izhikevich regular spiking pyramidal cell for  $D = 0$ : (c) bifurcation diagram and (d) plot of  $f$  versus  $\bar{I}$ . In (a) and (c), solid lines denote stable equilibrium points, and solid circles represent maximum and minimum values of the membrane potential  $v$  for the spiking states. Time series of the membrane potential  $v$  of (e) the Izhikevich fast spiking interneuron and (f) the Izhikevich regular spiking pyramidal cell for  $\bar{I} = 700$ .

## B. Synaptic Currents and Plasticity

The last two terms in Eq. (1) represent synaptic couplings of fast spiking interneurons in the I-population with  $N_I = 600$ .  $I_{syn,i}^{(II)}(t)$  and  $I_{syn,i}^{(IE)}(t)$  in Eqs. (8) and (9) denote intrapopulation I to I synaptic current and interpopulation E to I synaptic current injected into the fast spiking interneuron  $i$ , respectively, and  $V_{syn}^{(I)}$  [ $V_{syn}^{(E)}$ ] is the synaptic reversal potential for the inhibitory (excitatory) synapse. Similarly, regular spiking pyramidal cells in the E-population with  $N_E = 2400$  also have two types of synaptic couplings [see the last two terms in Eq. (3)]. In this case,  $I_{syn,i}^{(EE)}(t)$  and  $I_{syn,i}^{(EI)}(t)$  in Eqs. (8) and (9) represent intrapopulation E to E synaptic current and interpopulation I to E synaptic current injected into the regular spiking pyramidal cell  $i$ , respectively.

The intrapopulation synaptic connectivity in the  $X$ -population ( $X = I$  or  $E$ ) is given by the connection weight matrix  $W^{(XX)} (= \{w_{ij}^{(XX)}\})$  where  $w_{ij}^{(XX)} = 1$  if the neuron  $j$  is pre-synaptic to the neuron  $i$ ; otherwise,  $w_{ij}^{(XX)} = 0$ . Here, the intrapopulation synaptic connection is modeled in terms of the Watts-Strogatz small-world network. Then, the intrapopulation in-degree of the neuron  $i$ ,  $d_{in,i}^{intra}$  (i.e., the number of intrapopulation synaptic inputs to the neuron  $i$ ) is given by  $d_{in,i}^{intra} = \sum_{j=1}^{N_X} w_{ij}^{(XX)}$ . In this case, the average number of intrapopulation synaptic inputs per neuron is given by  $M_{syn}^{(X)} = \frac{1}{N_X} \sum_{i=1}^{N_X} d_{in,i}^{intra}$ . Throughout the paper, we consider sparsely connected case of  $M_{syn}^{(I)} = 40$  and  $M_{syn}^{(E)} = 160$  (see the 6th item of Table I). Next, we consider interpopulation synaptic couplings. The interpopulation synaptic connectivity from the source  $Y$ -population to the target  $X$ -population is given by the connection weight matrix  $W^{(XY)} (= \{w_{ij}^{(XY)}\})$  where  $w_{ij}^{(XY)} = 1$  if the neuron  $j$  in the source  $Y$ -population is pre-synaptic to the neuron  $i$  in the target  $X$ -population; otherwise,  $w_{ij}^{(XY)} = 0$ . Random uniform connections are made with the probability  $p_{inter}$  between the two I- and E-populations. Here, we consider the case of  $p_{inter} = 1/15$ . Then, the average number of E to I synaptic inputs per each fast spiking interneuron and I to E synaptic inputs per each regular spiking pyramidal cell are 160 and 40, respectively.

The fraction of open synaptic ion channels from the source  $Y$ -population to the target  $X$ -population at time  $t$  is denoted by  $s_j^{(XY)}(t)$ . The time course of  $s_j^{(XY)}(t)$  of the neuron  $j$  in the source  $Y$ -population is given by a sum of delayed double-exponential functions  $E_{XY}(t - t_f^{(j)} - \tau_l^{(XY)})$  [see Eq. (10)], where  $\tau_l^{(XY)}$  is the synaptic delay for the  $Y$  to  $X$  synapse, and  $t_f^{(j)}$  and  $F_j$  are the  $f$ th spiking time and the total number of spikes of the  $j$ th neuron in the  $Y$ -population at time  $t$ , respectively. Here,  $E_{XY}(t)$  in Eq. (11) [which corresponds to contribution of a pre-synaptic spike occurring at time 0 to  $s_j^{(XY)}(t)$

in the absence of synaptic delay] is controlled by the two synaptic time constants: synaptic rise time  $\tau_r^{(XY)}$  and decay time  $\tau_d^{(XY)}$ , and  $\Theta(t)$  is the Heaviside step function:  $\Theta(t) = 1$  for  $t \geq 0$  and 0 for  $t < 0$ . For the inhibitory GABAergic synapse (involving the GABA<sub>A</sub> receptors), the values of  $\tau_l^{(XI)}$ ,  $\tau_r^{(XI)}$ ,  $\tau_d^{(XI)}$ , and  $V_{syn}^{(I)}$  ( $X = I$  or  $E$ ) are listed in the 4th item of Table I [45]. For the excitatory AMPA synapse (involving the AMPA receptors), the values of  $\tau_l^{(XE)}$ ,  $\tau_r^{(XE)}$ ,  $\tau_d^{(XE)}$ , and  $V_{syn}^{(E)}$  ( $X = E$  or  $I$ ) are given in the 5th item of Table I [45].

The coupling strength of the synapse from the pre-synaptic neuron  $j$  in the source  $Y$ -population to the post-synaptic neuron  $i$  in the target  $X$ -population is  $J_{ij}^{(XY)}$ ; for the intrapopulation synaptic coupling  $X = Y$ , while for the interpopulation synaptic coupling,  $X \neq Y$ . Initial synaptic strengths are normally distributed with the mean  $J_0^{(XY)}$  and the standard deviation  $\sigma_0 (= 5)$ . Here,  $J_0^{(II)} = 1300$ ,  $J_0^{(EE)} = 300$ ,  $J_0^{(EI)} = 800$ ,  $J_0^{(IE)} = 487.5$  ( $= J_0^{(II)} J_0^{(EE)} / J_0^{(EI)}$ ) (see the 6th item of Table I). In this initial case, the E-I ratio (given by the ratio of average excitatory to inhibitory synaptic strengths) is the same in both fast spiking interneurons and regular spiking pyramidal cells [i.e.,  $J_0^{(EE)} / J_0^{(EI)}$  (E-population) =  $J_0^{(IE)} / J_0^{(II)}$  (I-population)] [45, 46, 48]. Hereafter, this will be called the ‘‘E-I ratio balance,’’ because the E-I ratios in both E- and I-populations are balanced. Intrapopulation (I to I and E to E) synaptic strengths are static because we do not take into consideration intrapopulation synaptic plasticity. For the interpopulation synaptic strengths  $\{J_{ij}^{(XY)}\}$ , we consider a multiplicative STDP (dependent on states) [77, 83, 117]. To avoid unbounded growth and elimination of synaptic connections, we set a range with the upper and the lower bounds:  $J_{ij}^{(XY)} \in [J_l, J_h]$ , where  $J_l = 0.0001$  and  $J_h = 2000$ . With increasing time  $t$ , synaptic strength for each interpopulation synapse is updated with a nearest-spike pair-based STDP rule [118]:

$$J_{ij}^{(XY)} \rightarrow J_{ij}^{(XY)} + \delta(J^* - J_{ij}^{(XY)}) |\Delta J_{ij}^{(XY)}(\Delta t_{ij}^{(XY)})|, \quad (12)$$

where  $J^* = J_h$  ( $J_l$ ) for the LTP (LTD) and  $\Delta J_{ij}^{(XY)}(\Delta t_{ij}^{(XY)})$  is the synaptic modification depending on the relative time difference  $\Delta t_{ij}^{(XY)} (= t_i^{(post,X)} - t_j^{(pre,Y)})$  between the nearest spike times of the post-synaptic neuron  $i$  in the target  $X$ -population and the pre-synaptic neuron  $j$  in the source  $Y$ -population. The values of the update rate  $\delta$  for the I to E iSTDP and the E to I eSTDP are 0.1 and 0.05, respectively (see the 7th and the 8th items of Table I)

For the I to E iSTDP, we use a time-delayed Hebbian time window for the synaptic modification

$\Delta J_{ij}^{(EI)}(\Delta t_{ij}^{(EI)})$  [79, 119, 120]:

$$\Delta J_{ij}^{(EI)}(\Delta t_{ij}^{(EI)}) = \begin{cases} E_+(\Delta t_{ij}^{(EI)}) \Delta t_{ij}^{(EI)\beta} & \text{for } \Delta t_{ij}^{(EI)} \geq 0 \\ E_-(\Delta t_{ij}^{(EI)}) \Delta t_{ij}^{(EI)\beta} & \text{for } \Delta t_{ij}^{(EI)} < 0 \end{cases} \quad (13)$$

Here,  $E_+(\Delta t_{ij}^{(EI)})$  and  $E_-(\Delta t_{ij}^{(EI)})$  are Hebbian exponential functions used in the case of E to E eSTDP [68, 80]:

$$\begin{aligned} E_+(\Delta t_{ij}^{(EI)}) &= A_+ N_+ e^{-\Delta t_{ij}^{(EI)}/\tau_+} \text{ and} \\ E_-(\Delta t_{ij}^{(EI)}) &= A_- N_- e^{\Delta t_{ij}^{(EI)}/\tau_-}, \end{aligned} \quad (14)$$

where  $N_+ = \frac{e^\beta}{\beta^\beta \tau_+^\beta}$ ,  $N_- = \frac{e^\beta}{\beta^\beta \tau_-^\beta}$ ,  $\beta = 10$ ,  $A_+ = 0.4$ ,  $A_- = 0.35$ ,  $\tau_+ = 2.6$  msec, and  $\tau_- = 2.8$  msec (these values are also given in the 7th item of Table I). We note that the synaptic modification  $\Delta J_{ij}^{(EI)}$  in Eq. (13) is given by the products of Hebbian exponential functions in Eq. (14) and the power function  $\Delta t_{ij}^{(EI)\beta}$ . As in the E to E Hebbian time window, LTP occurs for  $\Delta t_{ij}^{(EI)} > 0$ , while LTD takes place for  $\Delta t_{ij}^{(EI)} < 0$ . However, due to the effect of the power function,  $\Delta J_{ij}^{(EI)} \sim 0$  near  $\Delta t_{ij}^{(EI)} \sim 0$ , and delayed maximum and minimum for  $\Delta J_{ij}^{(EI)}$  appear at  $\Delta t_{ij}^{(EI)} = \beta\tau_+$  and  $-\beta\tau_-$ , respectively. Thus, Eq. (13) is called a time-delayed Hebbian time window, in contrast to the E to E Hebbian time window. This time-delayed Hebbian time window was experimentally found in the case of iSTDP at inhibitory synapses (from hippocampus) onto principal excitatory stellate cells in the superficial layer II of the entorhinal cortex [119].

For the E to I eSTDP, we employ an anti-Hebbian time window for the synaptic modification  $\Delta J_{ij}^{(IE)}(\Delta t_{ij}^{(IE)})$  [67, 121, 122]:

$$\Delta J_{ij}(\Delta t_{ij}) = \begin{cases} -A_+ e^{-\Delta t_{ij}^{(IE)}/\tau_+} & \text{for } \Delta t_{ij}^{(IE)} > 0 \\ A_- e^{\Delta t_{ij}^{(IE)}/\tau_-} & \text{for } \Delta t_{ij}^{(IE)} < 0 \end{cases}, \quad (15)$$

where  $A_+ = 1.0$ ,  $A_- = 0.9$ ,  $\tau_+ = 15$  msec,  $\tau_- = 15$  msec (these values are also given in the 8th item of Table I), and  $\Delta J_{ij}^{(IE)}(0) = 0$ . For  $\Delta t_{ij}^{(IE)} > 0$ , LTD occurs, while LTP takes place for  $\Delta t_{ij}^{(IE)} < 0$ , in contrast to the Hebbian time window for the E to E eSTDP [68, 80]. This anti-Hebbian time window was experimentally found in the case of eSTDP at excitatory synapses onto the GABAergic Purkinje-like cell in electrosensory lobe of electric fish [121].

### C. Numerical Method for Integration

Numerical integration of stochastic differential Eqs. (1)-(11) with a multiplicative STDP update rule of Eqs. (12) is done by employing the Heun method [123]

with the time step  $\Delta t = 0.01$  msec. For each realization of the stochastic process, we choose random initial points  $[v_i^{(X)}(0), u_i^{(X)}(0)]$  for the neuron  $i$  ( $i = 1, \dots, N_X$ ) in the  $X$ -population ( $X = I$  or  $E$ ) with uniform probability in the range of  $v_i^{(X)}(0) \in (-50, -45)$  and  $u_i^{(X)}(0) \in (10, 15)$ .

## III. EFFECTS OF INTERPOPULATION STDP ON FAST SPARSELY SYNCHRONIZED RHYTHMS

We consider clustered small-world networks with both I- and E-populations in Fig. 1. Each Watts-Strogatz small-world network with the rewiring probability  $p_{wiring} = 0.25$  has high clustering and short path length due to presence of predominantly local connections and rare long-range connections. The inhibitory small-world network consists of  $N_I$  fast spiking interneurons, and the excitatory small-world network is composed of  $N_E$  regular spiking pyramidal cells. Random and uniform interconnections between the inhibitory and the excitatory small-world networks are made with the small probability  $p_{inter} = 1/15$ . Throughout the paper,  $N_I = 600$  and  $N_E = 2400$ , except for the cases in Figs. 4(a1)-4(a3). Here we consider sparsely connected case. The average numbers of intrapopulation synaptic inputs per neuron are  $M_{syn}^{(I)} = 40$  and  $M_{syn}^{(E)} = 160$ , which are much smaller than  $N_I$  and  $N_E$ , respectively. For more details on the values of parameters, refer to Table I.

We first study emergence of fast sparse synchronization and its properties in the absence of STDP in the subsection III A. Then, in the subsection III B, we investigate the effects of interpopulation STDPs on diverse properties of population and individual behaviors of fast sparse synchronization in the combined case of both I to E iSTDP and E to I eSTDP.

### A. Emergence of Fast Sparse Synchronization and Its Properties in The Absence of STDP

Here, we are concerned about emergence of fast sparse synchronization and its properties in the I- and the E-populations in the absence of STDP. We also consider an interesting case of the E-I ratio balance where the ratio of average excitatory to inhibitory synaptic strengths is the same in both fast spiking interneurons and regular spiking pyramidal cells [45, 46, 48]. Initial synaptic strengths are chosen from the Gaussian distribution with the mean  $J_0^{(XY)}$  and the standard deviation  $\sigma_0$  ( $= 5$ ). The I to I synaptic strength  $J_0^{(II)}$  ( $= 1300$ ) is strong, and hence fast sparse synchronization may appear in the I-population under the balance between strong inhibition and strong external noise. This I-population is a dominant one in our coupled two-population system because  $J_0^{(II)}$  is much stronger in comparison with the E to E synaptic strength  $J_0^{(EE)}$  ( $= 300$ ). Moreover, the I to E synaptic strength

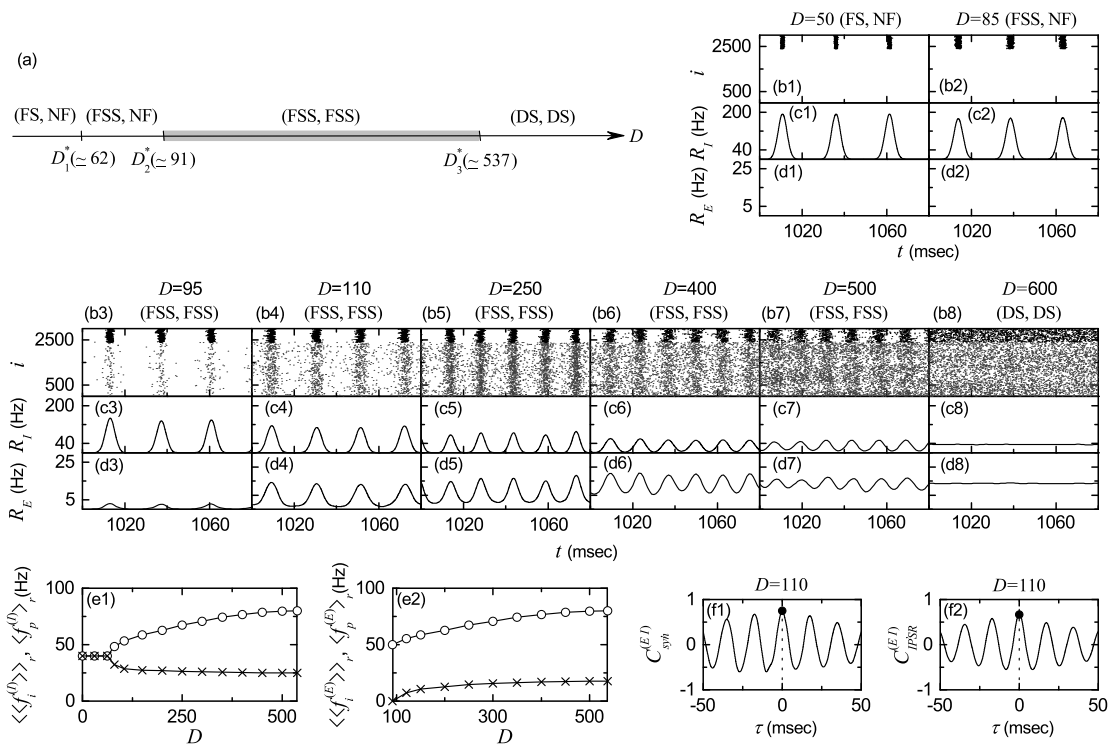

FIG. 3: Synchronized rhythms in both I- and E-populations in the absence of STDP. (a) Bar diagram for the population states (I, E) in the I- and E-populations. FS, FSS, NF, and DS denote full synchronization, fast sparse synchronization, non-firing, and desynchronization, respectively. (b1)-(b8) Raster plots of spikes for various values of  $D$ ; lower gray dots and upper black dots denote spikes in the E- and I-populations, respectively. (c1)-(c8) [(d1)-(d8)] Instantaneous population spike rates  $R_I(t)$  [ $R_E(t)$ ] of the I (E) population for various values of  $D$ . Plots of the population frequency  $\langle f_p^{(X)} \rangle_r$  (represented by open circles) and the population-averaged mean firing rates of individual neurons  $\langle \langle f_i^{(X)} \rangle \rangle_r$  (denoted by crosses) versus  $D$ ; (e1)  $X = I$  (I-population) and (e2)  $X = E$  (E-population). (f1) Cross-correlation function between total synaptic input currents  $I_{syn}^{(E)}(t)$  and  $I_{syn}^{(I)}(t)$  for  $D = 110$ . (f2) Cross-correlation function between instantaneous population spike rate outputs  $R_E(t)$  and  $R_I(t)$  for  $D = 110$ . In (f1) and (f2), solid circles represent the maxima of the cross-correlation functions.

$J_0^{(EI)} = 800$  is so strong that fast sparse synchronization may also appear in the E-population when the noise intensity  $D$  passes a threshold. In this state of fast sparse synchronization, regular spiking pyramidal cells in the E-population make firings at much lower rates than fast spiking interneurons in the I-population. Finally, the E to I synaptic strength  $J_0^{(IE)} (= 487.5)$  is given by the E-I ratio balance (i.e.,  $J_0^{(EE)}/J_0^{(EI)} = J_0^{(IE)}/J_0^{(II)}$ ). In this subsection, all these synaptic strengths are static because we do not consider any synaptic plasticity.

By varying the noise intensity  $D$ , we investigate emergence of diverse population states in both the I- and the E-populations. Figure 3(a) shows a bar diagram for the population states (I, E) in both I- and E-populations, where FS, FSS, NF, and DS represents full synchronization, fast sparse synchronization, non-firing, and desynchronization, respectively. Population synchronization may be well visualized in the raster plot of neural spikes which is a collection of spike trains of individual neurons. Such raster plots of spikes are fundamental data in experimental neuroscience. As a population quantity showing

collective behaviors, we use an instantaneous population spike rate which may be obtained from the raster plots of spikes [16, 27, 44–48, 124]. For a synchronous case, “spiking stripes” (consisting of spikes and indicating population synchronization) are found to be formed in the raster plot, while in a desynchronized case spikes are completely scattered without forming any stripes.

Such raster plots of spikes are well shown for various values of  $D$  in Figs. 3(b1)-3(b8). In each raster plot, spikes of  $N_I (= 600)$  fast spiking interneurons are shown with black dots in the upper part, while spikes of  $N_E (= 2400)$  regular spiking pyramidal cells are shown with gray dots in the lower part. Hence, in a synchronous case, an oscillating instantaneous population spike rate  $R_X(t)$  ( $X = I$  or  $E$ ) appears, while in a desynchronized case  $R_X(t)$  is nearly stationary. To obtain a smooth IPSR, we employ the kernel density estimation (kernel smoother) [125]. Each spike in the raster plot is convoluted (or blurred) with a kernel function  $K_h(t)$  to obtain a smooth



estimate of IPSR  $R_X(t)$ :

$$R_X(t) = \frac{1}{N_X} \sum_{i=1}^{N_X} \sum_{s=1}^{n_i^{(X)}} K_h(t - t_s^{(i,X)}), \quad (X = I \text{ or } E) \quad (16)$$

where  $t_s^{(i,X)}$  is the  $s$ th spiking time of the  $i$ th neuron in the  $X$ -population,  $n_i^{(X)}$  is the total number of spikes for the  $i$ th neuron, and we use a Gaussian kernel function of band width  $h$ :

$$K_h(t) = \frac{1}{\sqrt{2\pi}h} e^{-t^2/2h^2}, \quad -\infty < t < \infty. \quad (17)$$

Throughout the paper, the band width  $h$  of  $K_h(t)$  is 1 msec. The instantaneous population spike rates  $R_I(t)$  [ $R_E(t)$ ] for the I-(E-)population are shown for various values of  $D$  in Figs. 3(c1)-3(c8) [Figs. 3(d1)-3(d8)].

For sufficiently small  $D$ , individual fast spiking interneurons in the I-population fire regularly with the population-averaged mean firing rate  $\langle\langle f_i^{(I)} \rangle\rangle_r$  which is the same as the population frequency  $\langle f_p^{(I)} \rangle_r$  of the instantaneous population spike rate  $R_I(t)$ . Throughout the paper,  $\langle \dots \rangle$  denotes a population average and  $\langle \dots \rangle_r$  represents an average over 20 realizations. In this case, all fast spiking interneurons make spikings in each spiking stripe in the raster plot, and hence each stripe is fully occupied by spikes of all fast spiking interneurons. As a result, full synchronization with  $\langle\langle f_i^{(I)} \rangle\rangle_r = \langle f_p^{(I)} \rangle_r$  occurs. As an example of full synchronization in the I-population, we consider the case of  $D = 50$ . Figure 3(b1) shows the raster plot of spikes where black spiking stripes for the I-population appear successively, and the corresponding instantaneous population spike rate  $R_I(t)$  with a large amplitude oscillates regularly with  $\langle f_p^{(I)} \rangle_r \simeq 40$  Hz [see Fig. 3(c1)]. In contrast, for  $D = 50$ , regular spiking pyramidal cells in the E-population do not make firings (i.e., the E-population is in the non-firing state) due to strong I to E synaptic strength  $J_0^{(EI)} (=800)$ . In the isolated E-population (without synaptic coupling with the I-population), regular spiking pyramidal cells make firings with  $\langle\langle f_i^{(E)} \rangle\rangle_r \simeq 189.9$  Hz in a complete incoherent way, and hence population state becomes desynchronized (i.e., in this case, spikes of regular spiking pyramidal cells are completely scattered without forming any stripes in the raster plot). However, in the presence of strong I to E synaptic current, the population state for the E-population is transformed into a non-firing state. Thus, for  $D = 50$  there are no spikes of regular spiking pyramidal cells in the raster plot and no instantaneous population spike rate  $R_E(t)$  appears.

The full synchronization in the I-population persists until  $D = D_1^* (\simeq 62)$ . For  $D > D_1^*$ , full synchronization is developed into fast sparse synchronization with  $\langle f_p^{(I)} \rangle_r > \langle\langle f_i^{(I)} \rangle\rangle_r$  through a pitchfork bifurcation, as shown in Fig. 3(e1). In the case of fast sparse synchronization for  $D > D_1^*$ ,  $\langle f_p^{(I)} \rangle_r$  ( $\langle\langle f_i^{(I)} \rangle\rangle_r$ ) increases (decreases) monotonically from 40 Hz with increasing  $D$ . In

each realization, we get the population frequency  $f_p^{(X)}$  ( $X = I$  or  $E$ ) from the reciprocal of the ensemble average of  $10^4$  time intervals between successive maxima of  $R_X(t)$ , and obtain the mean firing rate  $f_i^{(X)}$  for each neuron in the  $X$ -population via averaging for  $2 \times 10^4$  msec;  $\langle f_i^{(X)} \rangle$  denotes a population-average of  $f_i^{(X)}$  over all neurons in the  $X$ -population. Due to the noise effect, individual fast spiking interneurons fire irregularly and intermittently at lower rates than the population frequency  $\langle f_p^{(I)} \rangle_r$ . Hence, only a smaller fraction of fast spiking interneurons fire in each spiking stripe in the raster plot (i.e., each spiking stripe is sparsely occupied by spikes of a smaller fraction of fast spiking interneurons). Figures 3(b2), 3(c2), and 3(d2) show an example of fast sparse synchronization in the I-population for  $D = 85$ . In this case, the instantaneous spike rate  $R_I(t)$  of the I-population rhythm makes fast oscillations with the population frequency  $\langle f_p^{(I)} \rangle_r (\simeq 48.3$  Hz), while fast spiking interneurons make spikings intermittently with lower population-averaged mean firing rate  $\langle\langle f_i^{(I)} \rangle\rangle_r (\simeq 32.2$  Hz) than the population frequency  $\langle f_p^{(I)} \rangle_r$ . Then, the black I-stripes (i.e., black spiking stripes for the I-population) in the raster plot become a little sparse and smeared, in comparison to the case of full synchronization for  $D = 50$ , and hence the amplitude of the corresponding instantaneous population spike rate  $R_I(t)$  (which oscillates with increased  $\langle f_p^{(I)} \rangle_r$ ) also has a little decreased amplitude. Thus, fast sparsely synchronized rhythm appears in the I-population. In contrast, for  $D = 85$  the E-population is still in a non-firing state [see Figs. 3(b2) and 3(d2)].

However, as  $D$  passes a 2nd threshold  $D_2^* (\simeq 91)$ , a transition from a non-firing to a firing state occurs in the E-population (i.e., regular spiking pyramidal cells begin to make noise-induced intermittent spikings). [Details on this kind of firing transition will be given below in Fig. 4(a1).] Then, fast sparse synchronization also appears in the E-population due to strong coherent I to E synaptic current to stimulate coherence between noise-induced spikings. Thus, fast sparse synchronization occurs together in both the (stimulating) I- and the (stimulated) E-populations, as shown in the raster plot of spikes in Fig. 3(b3) for  $D = 95$ . The instantaneous population spike rates  $R_I(t)$  and  $R_E(t)$  for the sparsely synchronized rhythms in the I- and the E-populations oscillate fast with the same population frequency  $\langle f_p^{(I)} \rangle_r = \langle f_p^{(E)} \rangle_r (\simeq 51.3$  Hz). Here, we note that the population frequency of fast sparsely synchronized rhythms is determined by the dominant stimulating I-population, and hence  $\langle f_p^{(E)} \rangle_r$  for the E-population is just the same as  $\langle f_p^{(I)} \rangle_r$  for the I-population. However, regular spiking pyramidal cells fire intermittent spikings with much lower population-averaged mean firing rate  $\langle\langle f_i^{(E)} \rangle\rangle_r (\simeq 2.7$  Hz) than  $\langle\langle f_i^{(I)} \rangle\rangle_r (\simeq 30$  Hz) of fast spiking interneurons. Hence, the gray E-stripes (i.e., gray spiking stripes for the E-population) in the raster plot of

spikes are much more sparse than the black I-stripes, and the amplitudes of  $R_E(t)$  are much smaller than those of  $R_I(t)$ .

With further increasing  $D$ , we study evolutions of (FSS, FSS) in both the I- and the E-populations for various values of  $D$  ( $D = 110, 250, 400, \text{ and } 500$ ). For these cases, raster plots of spikes are shown in Figs. 3(b4)-3(b7), and instantaneous population spike rates  $R_I(t)$  and  $R_E(t)$  are given in Figs. 3(c4)-3(c7) and Figs. 3(d4)-3(d7), respectively. In the I-population, as  $D$  is increased, more number of black I-stripes appear successively in the raster plots, which implies increase in the population frequency  $\langle f_p^{(I)} \rangle_r$  [see Fig. 3(e1)]. Furthermore, these black I-stripes become more sparse (i.e., density of spikes in the black I-stripes decreases) due to decrease in  $\langle \langle f_i^{(I)} \rangle \rangle_r$  [see Fig. 3(e1)], and they also are more and more smeared. Hence, with increasing  $D$  monotonic decrease in amplitudes of the corresponding instantaneous population spike rate  $R_I(t)$  occurs (i.e. the degree of fast sparse synchronization in the I-population is decreased). Eventually, when passing the 3rd threshold  $D_3^*$  ( $\simeq 537$ ), a transition from fast sparse synchronization to desynchronization occurs because of complete overlap between black I-stripes in the raster plot. Then, spikes of fast spiking interneurons are completely scattered in the raster plot, and the instantaneous population spike rate  $R_I(t)$  is nearly stationary, as shown in Figs. 3(b8) and 3(c8) for  $D = 600$ .

In the E-population, the instantaneous population spike rate  $R_E(t)$  for the sparsely synchronized rhythm oscillates fast with the population frequency  $\langle f_p^{(E)} \rangle_r$  which is the same as  $\langle f_p^{(I)} \rangle_r$  for the I-population;  $\langle f_p^{(E)} \rangle_r$  increases with  $D$  [see Fig. 3(e2)]. As  $D$  is increased, population-averaged mean firing rate  $\langle \langle f_i^{(E)} \rangle \rangle_r$  also increases due to decrease in the coherent I to E synaptic current (which results from decrease in the degree of fast sparse synchronization in the I-population) [see Fig. 3(e2)], in contrast to the case of  $\langle \langle f_i^{(I)} \rangle \rangle_r$  in the I-population (which decreases with  $D$ ). Hence, as  $D$  is increased, density of spikes in gray E-stripes in the raster plot increases (i.e., gray E-stripes become less sparse), unlike the case of I-population. On the other hand, with increasing  $D$  for  $D > 110$  E-stripes are more and more smeared, as in the case of I-population. The degree of fast sparse synchronization is determined by considering both the density of spikes [denoting the average occupation degree (corresponding to average fraction of regular spiking pyramidal cells in each E-stripe)] and the pacing degree of spikes (representing the degree of phase coherence between spikes) in the E-stripes, the details of which will be given in Fig. 4. Through competition between the (increasing) occupation degree and the (decreasing) pacing degree, it is found that the E-population has the maximum degree of fast sparse synchronization for  $D \sim 250$ ; details on the degree of fast sparse synchronization will be given below in Fig. 4. Thus, the amplitude of  $R_E(t)$  (representing the overall degree of fast sparse synchro-

nization) increases until  $D \sim 250$ , and then it decreases monotonically. Like the case of I-population, due to complete overlap between the gray E-stripes in the raster plot, a transition to desynchronization occurs at the same 3rd threshold  $D_3^*$ . Then, spikes of regular spiking pyramidal cells are completely scattered in the raster plot and the instantaneous population spike rate  $R_E(t)$  is nearly stationary [see Figs. 3(b8) and 3(d8) for  $D = 600$ ].

The E-I ratios,  $\alpha_I$  and  $\alpha_E$ , in the I- and the E-populations are given by the ratios of average excitatory to inhibitory synaptic strengths in the fast spiking interneurons and the regular spiking pyramidal cells, respectively [45, 46, 48]:

$$\alpha_I = \frac{\langle J_{ij}^{(IE)} \rangle}{\langle J_{ij}^{(II)} \rangle} \quad \text{and} \quad \alpha_E = \frac{\langle J_{ij}^{(EE)} \rangle}{\langle J_{ij}^{(EI)} \rangle}. \quad (18)$$

In the absence of STDP, we consider the case of E-I ratio balance [i.e.,  $\alpha_I (= J_0^{(IE)}/J_0^{(II)}) = \alpha_E (= J_0^{(EE)}/J_0^{(EI)}) = 0.375$ ] where the ratio of average excitatory to inhibitory synaptic strengths is the same in both fast spiking interneurons and regular spiking pyramidal cells. In this case, we study the phase shift between fast sparsely synchronized rhythms in the I- and the E-populations. We note that the black I-stripes and the gray E-stripes in the raster plots of spikes are in-phase, as shown in Figs. 3(b3)-3(b7). Hence, both  $R_I(t)$  and  $R_E(t)$  make in-phase oscillations with the same population frequency [compare Figs. 3(c3)-3(c7) with Figs. 3(d3)-3(d7)].

As an example for quantitative analysis of the phase shift, we consider a case of  $D = 110$ . Figure 3(f1) shows the cross-correlation function  $C_{syn}^{(E,I)}(\tau)$  between the population-averaged total synaptic input currents  $I_{syn}^{(E)}(t)$  and  $I_{syn}^{(I)}(t)$  into the E- and the I-populations:

$$C_{syn}^{(E,I)}(\tau) = \frac{\overline{\Delta I_{syn}^{(E)}(t+\tau) \Delta I_{syn}^{(I)}(t)}}{\sqrt{\overline{\Delta I_{syn}^{(E)}(t)^2}} \sqrt{\overline{\Delta I_{syn}^{(I)}(t)^2}}}, \quad (19)$$

where  $\Delta I_{syn}^{(X)}(t) = I_{syn}^{(X)}(t) - \overline{I_{syn}^{(X)}(t)}$  ( $X = I$  or  $E$ ), and throughout the paper, the overbar represents the time average. Here,  $I_{syn}^{(E)}(t)$  [ $I_{syn}^{(I)}(t)$ ] represents a population average of the total (inhibitory + excitatory) synaptic input currents into the regular spiking pyramidal cells (fast spiking interneurons) over the E-(I)-population:

$$I_{syn}^{(E)}(t) = \frac{1}{N_E} \sum_{i=1}^{N_E} [I_{syn,i}^{(EE)}(t) + I_{syn,i}^{(EI)}(t)] \quad \text{and} \\ I_{syn}^{(I)}(t) = \frac{1}{N_I} \sum_{i=1}^{N_I} [I_{syn,i}^{(II)}(t) + I_{syn,i}^{(IE)}(t)], \quad (20)$$

where the intrapopulation and the interpopulation synaptic currents  $I_{syn,i}^{(XX)}(t)$  and  $I_{syn,i}^{(XY)}(t)$  are given in Eqs. (8) and (9), respectively. Throughout the paper, a

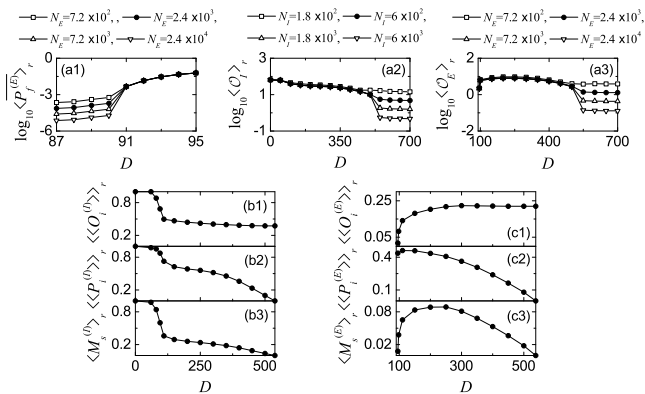

FIG. 4: Characterization of population synchronization in the absence of STDP. (a1) Plot of the average firing probability  $\langle P_f^{(E)} \rangle_r$  versus  $D$  in the E-population. (a2) Plot of the thermodynamic order parameter  $\langle \mathcal{O}_I \rangle_r$  versus  $D$  in the I-population. (a3) Plot of the thermodynamic order parameter  $\langle \mathcal{O}_E \rangle_r$  versus  $D$  in the E-population. Plots of (b1) the average occupation degree  $\langle \langle O_i^{(I)} \rangle \rangle_r$ , (b2) the average pacing degree  $\langle \langle P_i^{(I)} \rangle \rangle_r$ , and (b3) the statistical-mechanical spiking measure  $\langle M_s^{(I)} \rangle_r$  versus  $D$  in the I-population. Plots of (c1) the average occupation degree  $\langle \langle O_i^{(E)} \rangle \rangle_r$ , (c2) the average pacing degree  $\langle \langle P_i^{(E)} \rangle \rangle_r$ , and (c3) the statistical-mechanical spiking measure  $\langle M_s^{(E)} \rangle_r$  versus  $D$  in the E-population.

cross-correlation function is numerically calculated with  $2^{16}$  data points. We note that the main peak of the cross-correlation function  $C_{syn}^{(E,I)}(\tau)$  in Fig. 3(f1) appears at  $\tau = 0$ , which implies that population-averaged total synaptic inputs  $I_{syn}^{(E)}(t)$  and  $I_{syn}^{(I)}(t)$  are in-phase. As a result, instantaneous population spike rate outputs  $R_E(t)$  and  $R_I(t)$  of the E- and the I-populations are also in-phase, which may be well seen in the cross-correlation function  $C_{IPSR}^{(E,I)}(\tau)$  between  $R_E(t)$  and  $R_I(t)$  which also has the main peak at  $\tau = 0$  [see Fig. 3(f2)], where

$$C_{IPSR}^{(E,I)}(\tau) = \frac{\overline{\Delta R_E(t+\tau) \Delta R_I(t)}}{\sqrt{\overline{\Delta R_E^2(t)}} \sqrt{\overline{\Delta R_I^2(t)}}}. \quad (21)$$

For characterization of fast sparse synchronization [shown in Figs. 3(b3)-3(b8)], we first determine the 2nd and 3rd thresholds  $D_2^*$  ( $\simeq 91$ ) and  $D_3^*$  ( $\simeq 537$ ). When passing the 2nd threshold  $D_2^*$ , a firing transition (i.e., transition from a non-firing to a firing state) occurs in the E-population. We quantitatively characterize this firing transition in terms of the average firing probability  $P_f^{(E)}$  [126]. In each raster plot of spikes in the E-population, we divide a long-time interval into bins of width  $\delta$  ( $= 5$  msec) and calculate the firing probability in each  $i$ th bin (i.e., the fraction of firing regular spiking pyramidal cells in the  $i$ th bin):

$$P_f^{(E)}(i) = \frac{N_f^{(E)}(i)}{N_E}, \quad i = 1, 2, \dots, \quad (22)$$

where  $N_f^{(E)}(i)$  is the number of firing regular spiking pyramidal cells in the  $i$ th bin. Then, we get the average firing probability  $\overline{P_f^{(E)}}$  via time average of  $P_f^{(E)}(i)$  over sufficiently many bins:

$$\overline{P_f^{(E)}} = \frac{1}{N_b} \sum_{i=1}^{N_b} P_f^{(E)}(i), \quad (23)$$

where  $N_b$  is the number of bins for averaging. In each realization, the averaging is done for sufficiently large number of bins ( $N_b = 4000$ ). For a firing (non-firing) state, the average firing probability  $\overline{P_f^{(E)}}$  approaches a non-zero (zero) limit value in the thermodynamic limit of  $N_E \rightarrow \infty$ . Figure 4(a1) shows a plot of  $\log_{10} \langle P_f^{(E)} \rangle_r$  versus the noise intensity  $D$ . For  $D > D_2^*$ , firing states appear in the E-population (i.e., regular spiking pyramidal cells make noise-induced intermittent spikings) because  $\langle P_f^{(E)} \rangle_r$  tends to converge toward non-zero limit values. Then, strong coherent I to E synaptic input current stimulates fast sparse synchronization between these noise-induced intermittent spikes in the E-population. Thus, when passing  $D_2^*$  ( $\simeq 91$ ), (FSS, FSS) occurs in both the I- and the E-populations.

However, as  $D$  is further increased, the degree of (FSS, FSS) decreases, and eventually when passing the 3rd threshold  $D_3^*$ , a transition to desynchronization occurs in both the I- and the E-populations, due to a destructive role of noise to spoil fast sparse synchronization. We characterize this kind of synchronization-desynchronization transition in the  $X$ -population ( $X = I$  or  $E$ ) in terms of the order parameter  $\mathcal{O}_X$ , corresponding to the mean square deviation of the instantaneous population spike rate  $R_X(t)$  [124]:

$$\mathcal{O}_X = \overline{(R_X(t) - \overline{R_X(t)})^2}. \quad (24)$$

This order parameter may be regarded as a thermodynamic measure because it concerns just the macroscopic instantaneous population spike rate  $R_X(t)$  without any consideration between  $R_X(t)$  and microscopic individual spikes. For a synchronized state,  $R_X(t)$  exhibits an oscillatory behavior, while for a desynchronized state it is nearly stationary. Hence, the order parameter  $\mathcal{O}_X$  approaches a non-zero (zero) limit value in the synchronized (desynchronized) case in the thermodynamic limit of  $N_X \rightarrow \infty$ . In each realization, we obtain  $\mathcal{O}_X$  by following a stochastic trajectory for  $3 \times 10^4$  msec. Figures 4(a2) and 4(a3) show plots of  $\log_{10} \langle \mathcal{O}_I \rangle_r$  and  $\log_{10} \langle \mathcal{O}_E \rangle_r$  versus  $D$ , respectively. For  $D < D_3^*$  ( $\simeq 537$ ), (FSS, FSS) occurs in both the I- and the E-populations because the order parameters  $\langle \mathcal{O}_I \rangle_r$  and  $\langle \mathcal{O}_E \rangle_r$  tend to converge toward non-zero limit values. In contrast, for  $D > D_3^*$ , with increasing  $N_I$  and  $N_E$  both the order parameters  $\langle \mathcal{O}_I \rangle_r$  and  $\langle \mathcal{O}_E \rangle_r$  tend to approach zero, and hence a transition to desynchronization occurs together in both the I- and the E-populations.

We now measure the degree of fast sparse synchronization in the I- and the E-populations by employing the statistical-mechanical spiking measure  $M_s^{(X)}$  ( $X = I$  or  $E$ ) [124]. For a synchronous case, spiking I-(E)-stripes appear successively in the raster plot of spikes of fast spiking interneurons (regular spiking pyramidal cells). The spiking measure  $M_i^{(X)}$  of the  $i$ th  $X$ -stripe is defined by the product of the occupation degree  $O_i^{(X)}$  of spikes (denoting the density of the  $i$ th  $X$ -stripe) and the pacing degree  $P_i^{(X)}$  of spikes (representing the degree of phase coherence between spikes in the  $i$ th  $X$ -stripe):

$$M_i^{(X)} = O_i^{(X)} \cdot P_i^{(X)}. \quad (25)$$

The occupation degree  $O_i^{(X)}$  of spikes in the  $X$ -stripe is given by the fraction of spiking neurons:

$$O_i^{(X)} = \frac{N_i^{(s,X)}}{N_X}, \quad (26)$$

where  $N_i^{(s,X)}$  is the number of spiking neurons in the  $i$ th  $X$ -stripe. In the case of sparse synchronization,  $O_i^{(X)} < 1$ , in contrast to the case of full synchronization with  $O_i^{(X)} = 1$ .

The pacing degree  $P_i^{(X)}$  of spikes in the  $i$ th  $X$ -stripe can be determined in a statistical-mechanical way by considering their contributions to the macroscopic instantaneous population spike rate  $R_X(t)$ . Central maxima of  $R_X(t)$  between neighboring left and right minima of  $R_X(t)$  coincide with centers of  $X$ -stripes in the raster plot. A global cycle begins from a left minimum of  $R_X(t)$ , passes a maximum, and ends at a right minimum. An instantaneous global phase  $\Phi^{(X)}(t)$  of  $R_X(t)$  was introduced via linear interpolation in the region forming a global cycle [for details, refer to Eqs. (16) and (17) in [124]]. Then, the contribution of the  $k$ th microscopic spike in the  $i$ th  $X$ -stripe occurring at the time  $t_k^{(s,X)}$  to  $R_X(t)$  is given by  $\cos \Phi_k^{(X)}$ , where  $\Phi_k^{(X)}$  is the global phase at the  $k$ th spiking time [i.e.,  $\Phi_k^{(X)} \equiv \Phi^{(X)}(t_k^{(s,X)})$ ]. A microscopic spike makes the most constructive (in-phase) contribution to  $R_X(t)$  when the corresponding global phase  $\Phi_k^{(X)}$  is  $2\pi n$  ( $n = 0, 1, 2, \dots$ ). In contrast, it makes the most destructive (anti-phase) contribution to  $R_X(t)$  when  $\Phi_k^{(X)}$  is  $2\pi(n - 1/2)$ . By averaging the contributions of all microscopic spikes in the  $i$ th  $X$ -stripe to  $R_X(t)$ , we get the pacing degree of spikes in the  $i$ th  $X$ -stripe [refer to Eq. (18) in [124]]:

$$P_i^{(X)} = \frac{1}{S_i^{(X)}} \sum_{k=1}^{S_i^{(X)}} \cos \Phi_k^{(X)}, \quad (27)$$

where  $S_i^{(X)}$  is the total number of microscopic spikes in the  $i$ th  $X$ -stripe. Then, via averaging  $M_i^{(X)}$  of Eq. (25) over a sufficiently large number  $N_s^{(X)}$  of  $X$ -stripes, we

obtain the statistical-mechanical spiking measure  $M_s^{(X)}$ , based on the instantaneous population spike rate  $R_X(t)$  [refer to Eq. (19) in [124]]:

$$M_s^{(X)} = \frac{1}{N_s^{(X)}} \sum_{i=1}^{N_s^{(X)}} M_i^{(X)}. \quad (28)$$

In each realization, we obtain  $\langle O_i^{(X)} \rangle$ ,  $\langle P_i^{(X)} \rangle$ , and  $M_s^{(X)}$  by following  $6 \times 10^3$   $X$ -stripes.

We first consider the case of I-population (i.e.,  $X = I$ ) which is a dominant one in our coupled two-population network. Figures 4(b1)-4(b3) show the average occupation degree  $\langle \langle O_i^{(I)} \rangle \rangle_r$ , the average pacing degree  $\langle \langle P_i^{(I)} \rangle \rangle_r$ , and the statistical-mechanical spiking measure  $\langle M_s^{(I)} \rangle_r$  in the range of  $0 < D < D_3^*$ , respectively. With increasing  $D$  from 0 to  $D_1^*$  ( $\simeq 62$ ), full synchronization persists, and hence  $\langle \langle O_i^{(I)} \rangle \rangle_r = 1$ . In this range of  $D$ ,  $\langle \langle P_i^{(I)} \rangle \rangle_r$  decreases very slowly from 1.0 to 0.98. In the case of full synchronization, the statistical-mechanical spiking measure is equal to the average pacing degree (i.e.,  $\langle M_s^{(I)} \rangle_r = \langle \langle P_i^{(I)} \rangle \rangle_r$ ). However, as  $D$  is increased from  $D_1^*$ , full synchronization is developed into fast sparse synchronization. In the case of fast sparse synchronization, at first  $\langle \langle O_i^{(I)} \rangle \rangle_r$  (representing the density of spikes in the I-stripes) decreases rapidly due to break-up of full synchronization, and then it slowly decreases toward a limit value of  $\langle \langle O_i^{(I)} \rangle \rangle_r \simeq 0.37$  for  $D = D_3^*$ , like the behavior of population-averaged mean firing rate  $\langle \langle f_i^{(I)} \rangle \rangle_r$  in Fig. 3(e1). The average pacing degree  $\langle \langle P_i^{(I)} \rangle \rangle_r$  denotes well the average degree of phase coherence between spikes in the I-stripes; as the I-stripes become more smeared, their pacing degree gets decreased. With increasing  $D$ ,  $\langle \langle P_i^{(I)} \rangle \rangle_r$  decreases due to intensified smearing, and for large  $D$  near  $D_3^*$  it converges to zero due to complete overlap between sparse spiking I-stripes. The statistical-mechanical spiking measure  $\langle M_s^{(I)} \rangle_r$  is obtained via product of the occupation and the pacing degrees of spikes. Due to the rapid decrease in  $\langle \langle O_i^{(I)} \rangle \rangle_r$ , at first  $\langle M_s^{(I)} \rangle_r$  also decreases rapidly, and then it makes a slow convergence to zero for  $D = D_3^*$ , like the case of  $\langle \langle P_i^{(I)} \rangle \rangle_r$ . Thus, three kinds of downhill-shaped curves (composed of solid circles) for  $\langle \langle O_i^{(I)} \rangle \rangle_r$ ,  $\langle \langle P_i^{(I)} \rangle \rangle_r$  and  $\langle M_s^{(I)} \rangle_r$  are formed [see Figs. 4(b1)-4(b3)].

Figures 4(c1)-4(c3) show  $\langle \langle O_i^{(E)} \rangle \rangle_r$ ,  $\langle \langle P_i^{(E)} \rangle \rangle_r$ , and  $\langle M_s^{(E)} \rangle_r$  in the E-population for  $D_2^* < D < D_3^*$ , respectively. When passing the 2nd threshold  $D_2^*$ , fast sparse synchronization appears in the E-population because strong coherent I to E synaptic input current stimulates coherence between noise-induced intermittent spikes [i.e., sparsely synchronized E-population rhythms are locked to (stimulating) sparsely synchronized I-population rhythms]. In this case, at first, the average occupation degree  $\langle \langle O_i^{(E)} \rangle \rangle_r$  begins to make a rapid increase from 0, and then it increases slowly to a satu-



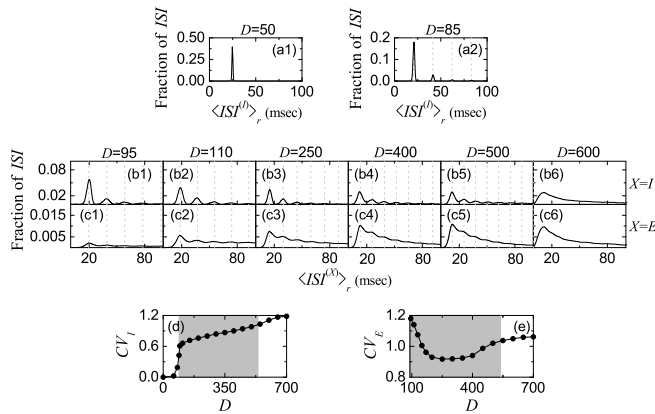

FIG. 5: Characterization of individual spiking behaviors in the absence of STDP. ISI histograms for  $D =$  (a1) 50 and (a2) 85 in the I-population. ISI histograms for various values of  $D$  in the I-population ( $X = I$ ) [(b1)-(b6)] and the E-population ( $X = E$ ) [(c1)-(c6)]. Vertical dotted lines in (a2), (b1)-(b5), and (c1)-(c5) represent multiples of the global period  $T_G^{(X)}$  of the instantaneous population spike rate  $R_X(t)$  ( $X = I$  or  $E$ ). Plots of the coefficient of variation  $CV_X$  versus  $D$ ;  $X =$  (d)  $I$  and (e)  $E$ . In (d) and (e), (FSS, FSS) occurs in the intermediate gray-shaded region.

rated limit value of  $\langle\langle O_i^{(E)} \rangle\rangle_r \simeq 0.22$ . Thus, an uphill-shaped curve for  $\langle\langle O_i^{(E)} \rangle\rangle_r$  is formed, similar to the case of population-averaged mean firing rate  $\langle\langle f_i^{(E)} \rangle\rangle_r$  in Fig. 3(e2). In contrast, just after  $D = D_2^*$ , the average pacing degree  $\langle\langle P_i^{(E)} \rangle\rangle_r$  starts from a non-zero value (e.g.,  $\langle\langle P_i^{(E)} \rangle\rangle_r \simeq 0.409$  for  $D = 92$ ), it increases to a maximum value ( $\simeq 0.465$ ) for  $D \sim 150$ , and then it decreases monotonically to zero at the 3rd threshold  $D_3^*$  because of complete overlap between sparse E-stripes. Thus, for  $D > 150$  the graph for  $\langle\langle P_i^{(E)} \rangle\rangle_r$  is a downhill-shaped curve. Through the product of the occupation (uphill curve) and the pacing (downhill curve) degrees, the spiking measure  $\langle M_s^{(E)} \rangle_r$  forms a bell-shaped curve with a maximum ( $\simeq 0.089$ ) at  $D \sim 250$ ; the values of  $\langle M_s^{(E)} \rangle_r$  are zero at both ends ( $D_2^*$  and  $D_3^*$ ). This spiking measure  $\langle M_s^{(E)} \rangle_r$  of the E-population rhythms is much less than that  $\langle M_s^{(I)} \rangle_r$  of the dominant I-population rhythms.

In addition to characterization of population synchronization in Fig. 4, we also characterize individual spiking behaviors of fast spiking interneurons and regular spiking pyramidal cells in terms of interspike intervals (ISIs) in Fig. 5. In each realization, we obtain one ISI histogram which is composed of  $10^5$  ISIs obtained from all individual neurons, and then we get an averaged ISI histogram for  $\langle ISI^{(X)} \rangle_r$  ( $X = I$  or  $E$ ) via 20 realizations.

We first consider the case of (stimulating) dominant I-population. In the case of full synchronization for  $D = 50$ , the ISI histogram is shown in Fig. 5(a1). It has a sharp single peak at  $\langle ISI^{(I)} \rangle_r = 25$  msec. In this case,

all fast spiking interneurons exhibit regular spikings like clocks with  $\langle\langle f_i^{(I)} \rangle\rangle_r \simeq 40$  Hz, which leads to emergence of fully synchronized rhythm with the same population frequency  $\langle f_p^{(I)} \rangle_r \simeq 40$  Hz.

However, when passing the 1st threshold  $D_1^*$  ( $\simeq 62$ ), fast sparse synchronization emerges via break-up of full synchronization due to a destructive role of noise. Due to the noise effect, individual fast sparse interneurons exhibit intermittent spikings phase-locked to the instantaneous population spike rate  $R_I(t)$  at random multiples of the global period  $T_G^{(I)}$  of  $R_I(t)$ , unlike the case of full synchronization. This “stochastic phase locking,” resulting in “stochastic spike skipping,” is well shown in the ISI histogram with multiple peaks appearing at integer multiples of  $T_G^{(I)}$ , as shown in Fig. 5(a2) for  $D = 85$ , which is in contrast to the case of full synchronization with a single-peaked ISI histogram. In this case, the 1st-order main peak at  $T_G^{(I)}$  ( $\simeq 20.7$  msec) is a dominant one, and smaller 2nd- and 3rd-order peaks (appearing at  $2 T_G^{(I)}$  and  $3 T_G^{(I)}$ ) may also be seen. Here, vertical dotted lines in Fig. 5(a2), Figs. 5(b1)-5(b5), and Figs. 5(c1)-5(c5) represent multiples of the global period  $T_G^{(X)}$  of the instantaneous population spike rate  $R_X(t)$  ( $X = I$  or  $E$ ). In the case of  $D = 85$ , the average ISI  $\langle\langle ISI^{(I)} \rangle\rangle_r$  ( $\simeq 31.0$  msec) is increased, in comparison with that in the case of full synchronization. Hence, fast spiking interneurons make intermittent spikings at lower population-averaged mean firing rate  $\langle\langle f_i^{(I)} \rangle\rangle_r$  ( $\simeq 32.3$  Hz) than the population frequency  $\langle f_p^{(I)} \rangle_r$  ( $\simeq 48.3$  Hz), in contrast to the case of full synchronization with  $\langle\langle f_i^{(I)} \rangle\rangle_r = \langle f_p^{(I)} \rangle_r$  ( $\simeq 40$  Hz).

This kind of spike-skipping phenomena (characterized with multi-peaked ISI histograms) have also been found in networks of coupled inhibitory neurons where noise-induced hoppings from one cluster to another one occur [127], in single noisy neuron models exhibiting stochastic resonance due to a weak periodic external force [128, 129], and in inhibitory networks of coupled subthreshold neurons showing stochastic spiking coherence [130–132]. Because of this stochastic spike skipping, the population-averaged mean firing rate of individual neurons becomes less than the population frequency, which leads to occurrence of sparse synchronization (i.e., sparse occupation occurs in spiking stripes in the raster plot).

As  $D$  passes the 2nd threshold  $D_2^*$  ( $\simeq 91$ ), fast sparse synchronization emerges in the E-population because of strong coherent I to E synaptic input current stimulating coherence between noise-induced intermittent spikes. Thus, for  $D > D_2^*$  fast sparse synchronization occurs together in both the I- and the E-populations. However, when passing the large 3rd threshold  $D_3^*$  ( $\simeq 537$ ), a transition from fast sparse synchronization to desynchronization occurs due to a destructive role of noise to spoil fast sparse synchronization. Hence, for  $D > D_3^*$  desynchronized states exist in both the I- and the E-populations. With increasing  $D$  from  $D_2^*$ , we investigate individual

spiking behaviors in terms of ISIs in both the I- and the E-populations.

Figures 5(b1)-5(b5) show ISI histograms for various values of  $D$  in the case of fast sparse synchronization in the (stimulating) dominant I-population. Due to the stochastic spike skipings, multiple peaks appear at integer multiples of the global period  $T_G^{(I)}$  of  $R_I(t)$ . As  $D$  is increased, fast spiking interneurons tend to fire more irregularly and sparsely. Hence, the 1st-order main peak becomes lowered and broadened, higher-order peaks also become wider, and thus mergings between multiple peaks occur. Hence, with increasing  $D$ , the average ISI  $\langle\langle ISI^{(I)} \rangle\rangle_r$  increases due to developed tail part. We note that the population-averaged mean firing rate  $\langle\langle f_i^{(I)} \rangle\rangle_r$  corresponds to the reciprocal of the average ISI  $\langle\langle ISI^{(I)} \rangle\rangle_r$ . Hence, as  $D$  is increased in the case of fast sparse synchronization,  $\langle\langle f_i^{(I)} \rangle\rangle_r$  decreases [see Fig. 3(e1)]. These individual spiking behaviors make some effects on population behaviors. Because of decrease in  $\langle\langle f_i^{(I)} \rangle\rangle_r$  with increasing  $D$ , spikes become more sparse, and hence the average occupation degree  $\langle\langle O_i^{(I)} \rangle\rangle_r$  in the spiking stripes in the raster plots decreases, as shown in Figs. 4(b1). Also, due to merging between peaks (i.e., due to increase in the irregularity degree of individual spikings), spiking stripes in the raster plots in Figs. 3(b3)-3(b7) become more smeared as  $D$  is increased, and hence the average pacing degrees  $\langle\langle P_i^{(I)} \rangle\rangle_r$  of spikes in the stripes get decreased [see Fig. 4(b2)].

In the case of desynchronization, multiple peaks overlap completely, and hence spikes in the raster plot are completely scattered. Thus, a single-peaked ISI histogram with a long tail appears, as shown in Fig. 5(b6) for  $D = 600$ . In this case of  $D = 600$ , the average ISI  $\langle\langle ISI^{(I)} \rangle\rangle_r$  ( $\simeq 39.7$  msec) is a little shorter than that ( $\simeq 40$  msec) for  $D = 500$ , in contrast to the increasing tendency in the case of fast sparse synchronization. In the desynchronized state for  $D > D_3^*$ , the I to I synaptic current is incoherent (i.e., the instantaneous population spike rate  $R_I(t)$  is nearly stationary), and hence noise no longer causes stochastic phase lockings. In this case, noise just makes fast spiking interneurons fire more frequently, along with the incoherent synaptic input currents. Thus, with increasing  $D$  in the desynchronized case, the average ISI  $\langle\langle ISI^{(I)} \rangle\rangle_r$  tends to decrease, in contrast to the case of fast sparse synchronization. The corresponding population-averaged mean firing rate  $\langle\langle f_i^{(I)} \rangle\rangle_r$  in the desynchronized case also tends to increase, in contrast to the decreasing tendency in the case of fast sparse synchronization.

We now consider the case of (stimulated) E-population for  $D > D_2^*$ . Figures 5(c1)-5(c5) show ISI histograms for various values of  $D$  in the case of fast sparse synchronization. In this case, both the coherent I to E synaptic input and noise make effects on individual spiking behaviors of regular spiking pyramidal cells. Due to the stochastic spike skipings, multiple peaks appear, as in the case of I-population. However, as  $D$  is increased,

stochastic spike skipings become weakened (i.e., regular spiking pyramidal cells tend to fire less sparsely) due to decrease in strengths of the stimulating I to E synaptic input currents. Hence, the heights of major lower-order peaks (e.g. the main 1st-order peak and the 2nd- and 3rd-order peaks) continue to increase with increasing  $D$ , in contrast to the case of I-population where the major peaks are lowered due to noise effect.

Just after appearance of fast sparse synchronization (appearing due to coherent I to E synaptic current), a long tail is developed so much in the ISI histogram [e.g., see Fig. 5(c1) for  $D = 95$ ], and hence multiple peaks are less developed. As  $D$  is a little more increased, multiple peaks begin to be clearly developed due to a constructive role of coherent I to E synaptic input, as shown in Fig. 5(c2) for  $D = 110$ . Thus, the average pacing degree  $\langle\langle P_i^{(E)} \rangle\rangle_r$  of spikes in the E-stripes for  $D = 110$  increases a little in comparison with that for  $D = 95$ , as shown in Fig. 4(c2). However, as  $D$  is further increased for  $D > 150$ , mergings between multiple peaks begin to occur due to a destructive role of noise, as shown in Figs. 5(c3)-5(c5). Hence, with increasing  $D$  from 150, the average pacing degree  $\langle\langle P_i^{(E)} \rangle\rangle_r$  of spikes also begins to decrease [see Fig. 4(c2)], as in the case of I-population.

With increasing  $D$  in the case of fast sparse synchronization, the average ISI  $\langle\langle ISI^{(E)} \rangle\rangle_r$  decreases mainly due to increase in the heights of major lower-order peaks, in contrast to the increasing tendency for  $\langle\langle ISI^{(I)} \rangle\rangle_r$  in the I-population. This decreasing tendency for  $\langle\langle ISI^{(E)} \rangle\rangle_r$  continues even in the case of desynchronization. Figure 5(c6) shows a single-peaked ISI histogram with a long tail (that appears through complete merging between multiple peaks) for  $D = 600$  (where desynchronization occurs). In this case, the average ISI  $\langle\langle ISI^{(E)} \rangle\rangle_r$  ( $\simeq 54.9$  msec) is shorter than that (56.8 msec) in the case of fast sparse synchronization for  $D = 500$ . We also note that for each value of  $D$  (in the case of fast sparse synchronization and desynchronization),  $\langle\langle ISI^{(E)} \rangle\rangle_r$  is longer than  $\langle\langle ISI^{(I)} \rangle\rangle_r$  in the case of I-population, due to much more developed tail part.

As a result of decrease in the average ISI  $\langle\langle ISI^{(E)} \rangle\rangle_r$ , the population-averaged mean firing rate  $\langle\langle f_i^{(E)} \rangle\rangle_r$  (corresponding to the reciprocal of  $\langle\langle ISI^{(E)} \rangle\rangle_r$ ) increases with  $D$  [see Fig. 3(e2)]. We also note that these population-averaged mean firing rates  $\langle\langle f_i^{(E)} \rangle\rangle_r$  are much lower than  $\langle\langle f_i^{(I)} \rangle\rangle_r$  in the (stimulating) I-population, although the population frequencies in both populations are the same. In the case of fast sparse synchronization, due to increase in  $\langle\langle f_i^{(E)} \rangle\rangle_r$ , E-stripes in the raster plot become less sparse [i.e., the average occupation degree  $\langle\langle O_i^{(E)} \rangle\rangle_r$  of spikes in the E-stripes increases, as shown in Fig. 4(c1)]. The increasing tendency for  $\langle\langle f_i^{(E)} \rangle\rangle_r$  continues even in the case of desynchronization. For example, the population-averaged mean firing rate  $\langle\langle f_i^{(E)} \rangle\rangle_r$  ( $\simeq 18.2$  Hz) for  $D = 600$  is increased in comparison with that ( $\simeq 17.6$  Hz) for  $D = 500$ .

We are also concerned about temporal variability of individual single-cell spike discharges. Irregularity degree of individual single-cell firings may be measured in terms of the coefficient of variation (defined by the ratio of the standard deviation to the mean for the distribution of ISIs) [133]. As the coefficient of variation is increased, the irregularity degree of individual firings of single cells increases. For example, in the case of a Poisson process, the coefficient of variation takes a value 1. However, this (i.e., to take the value 1 for the coefficient of variation) is just a necessary, though not sufficient, condition to identify a Poisson spike train. When the coefficient of variation for a spike train is less than 1, it is more regular than a Poisson process with the same mean firing rate [134]. On the other hand, if the coefficient of variation is larger than 1, then the spike train is more irregular than the Poisson process (e.g., see Fig. 1C in [27]). By varying  $D$ , we obtain coefficients of variation from the realization-averaged ISI histograms. Figures 5(d) and 5(e) show plots of the coefficients of variation,  $CV_I$  and  $CV_E$ , versus  $D$  for individual firings of fast spiking interneurons (I-population) and regular spiking pyramidal cells (E-population), respectively. Gray-shaded regions in Figs. 5(d)-5(e) correspond to the regions of (FSS, FSS) (i.e.,  $D_2^* < D < D_3^*$ ) where fast sparse synchronization appears in both the I- and the E-populations.

We first consider the case of fast spiking interneurons in Fig. 5(d). In the case of full synchronization for  $D < D_1^*$  ( $\simeq 62$ ), the coefficient of variation is nearly zero; with increasing  $D$  in this region, the coefficient of variation increases very slowly. Hence, individual firings of fast spiking interneurons in the case of full synchronization are very regular. However, when passing the 1st threshold  $D_1^*$ , fast sparse synchronization appears via break-up of full synchronization. Then, the coefficient of variation increases so rapidly, and the irregularity degree of individual firings increases. In the gray-shaded region, the coefficient of variation continues to increase with relatively slow rates. Hence, with increasing  $D$ , spike trains of fast spiking interneurons become more irregular. This increasing tendency for the coefficient of variation continues in the desynchronized region. For  $D = 600$  in Fig. 5(b6), fast spiking interneurons fire more irregularly in comparison with the case of  $D = 500$ , because the value of the coefficient of variation for  $D = 600$  is increased.

In the case of regular spiking pyramidal cells in the E-population, the coefficients of variation form a well-shaped curve with a minimum at  $D \simeq 250$  in Fig. 5(e). Just after passing  $D_2^*$  (e.g.,  $D = 95$ ), regular spiking pyramidal cells fire very irregularly and sparsely, and hence its coefficient of variation becomes very high. In the states of fast sparse synchronization, the values of coefficient of variation are larger than those in the case of fast spiking interneurons, and hence regular spiking pyramidal cells in the (stimulated) E-population exhibit more irregular spikings than fast spiking interneurons in the (stimulating) I-population. In the case of desyn-

chronization, the increasing tendency in the coefficient of variation continues. However, the increasing rate becomes relatively slow, in comparison with the case of fast spiking interneurons. Thus, for  $D = 600$ , the value of coefficient of variation is less than that in the case of fast spiking interneurons.

We emphasize that a high coefficient of variation is not necessarily inconsistent with the presence of population synchronous rhythms [16]. In the gray-shaded region in Figs. 5(d)-5(e), fast sparsely synchronized rhythms emerge, together with stochastic and intermittent spike discharges of single cells. Due to the stochastic spike skipplings (which results from random phase-lockings to the instantaneous population spike rates), multi-peaked ISI histograms appear. Due to these multi-peaked structure in the histograms, the standard deviation becomes large, which leads to a large coefficient of variation (implying high irregularity). However, in addition to such irregularity, the presence of multi peaks (corresponding to phase lockings) also represents some kind of regularity. In this sense, both irregularity and regularity coexist in spike trains for the case of fast sparse synchronization, in contrast to both cases of full synchronization (complete regularity) and desynchronization (complete irregularity).

We also note that the reciprocal of the coefficient of variation represents regularity degree of individual single-cell spike discharges. It is expected that high regularity of individual single-cell firings in the  $X$ -population ( $X = I$  or  $E$ ) may result in good population synchronization with high spiking measure  $\langle M_s^{(X)} \rangle$  of Eq. (28). We examine the correlation between the reciprocal of the coefficient of variation and the spiking measure  $\langle M_s^{(X)} \rangle$  in both the I- and the E-populations. In the I-population, plots of both the reciprocal of the coefficient of variation and the spiking measure  $\langle M_s^{(I)} \rangle$  versus  $D$  form downhill-shaped curves, and they are found to have a strong correlation with Pearson's correlation coefficient  $r \simeq 0.966$  [135]. On the other hand, in the case of E-population, plots of both the reciprocal of the coefficient of variation and the spiking measure  $\langle M_s^{(E)} \rangle$  versus  $D$  form bell-shaped curves. They also shows a good correlation, although the Pearson's correlation coefficient is reduced to  $r \simeq 0.643$  due to some quantitative discrepancy near  $D_2^*$ . As a result of such good correlation, the maxima for the reciprocal of the coefficient of variation and the spiking measure  $\langle M_s^{(E)} \rangle$  appear at the same value of  $D$  ( $\simeq 250$ ).

## B. Effect of Interpopulation (both I to E and E to I) STDPs on Population States in The I- and The E-populations

In this subsection, we consider a combined case including both I to E iSTDP and E to I eSTDP, and study their effects on population states (I, E) in both the I- and the E-populations. A main finding is occurrence of an equal-



ization effect in the spiking measure  $\langle M_s^{(X)} \rangle_r$  ( $X = I$  or  $E$ ) which represents overall synchronization degree of the fast sparse synchronization. In a wide region of intermediate  $D$ , the degree of good synchronization (with higher spiking measure) gets decreased, while in a region of large  $D$  the degree of bad synchronization (with lower spiking measure) becomes increased. Particularly, some desynchronized states for  $D > D_3^*$  ( $\simeq 537$ ) in the absence of STDP becomes transformed into fast sparsely synchronized ones in the presence of interpopulation STDPs, and hence the region of fast sparse synchronization is so much extended. Thus, the degree of fast sparse synchronization becomes nearly the same in such an extended broad region of  $D$  (including both the intermediate and the large  $D$ ) (i.e., the standard deviation in the distribution of spiking measures is much decreased in comparison with that in the absence of STDP). This kind of equalization effect is distinctly in contrast to the Matthew (bipolarization) effect in the case of intrapopulation (I to I and E to E) STDPs where good (bad) synchronization becomes better (worse) [80, 83].

Here, we are concerned about population states (I, E) in the I- and the E-populations for  $D > D_2^*$  ( $\simeq 91$ ). In the absence of STDP, (FSS, FSS) appears for  $D_2^* < D < D_3^*$  ( $\simeq 537$ ), while for  $D > D_3^*$  desynchronization occurs together in both the I- and the E-populations [see Fig. 3(a)]. The initial synaptic strengths are chosen from the Gaussian distribution with the mean  $J_0^{(XY)}$  and the standard deviation  $\sigma_0$  ( $= 5$ ), where  $J_0^{(II)} = 1300$ ,  $J_0^{(EE)} = 300$ ,  $J_0^{(EI)} = 800$ , and  $J_0^{(IE)} = 487.5$  ( $= J_0^{(II)} J_0^{(EE)} / J_0^{(EI)}$ ). (These initial synaptic strengths are the same as those in the absence of STDP.) We note that this initial case satisfies the E-I ratio balance [i.e.,  $\alpha_E$  ( $= J_0^{(EE)} / J_0^{(EI)}$ )  $= \alpha_I$  ( $= J_0^{(IE)} / J_0^{(II)}$ )  $= 0.375$ ]. In the case of combined interpopulation (both I to E and E to I) STDPs, both synaptic strengths  $\{J_{ij}^{(EI)}\}$  and  $\{J_{ij}^{(IE)}\}$  are updated according to the nearest-spike pair-based STDP rule in Eq. (12), while intrapopulation (I to I and E to E) synaptic strengths are static. By increasing  $D$  from  $D_2^*$  ( $\simeq 91$ ), we investigate the effects of combined interpopulation STDPs on population states (I, E) in the I- and the E-populations, and make comparison with the case without STDP.

We first consider the case of I to E iSTDP. Figure 6(a) shows a time-delayed Hebbian time window for the synaptic modification  $\Delta J_{ij}^{(EI)}$  ( $\Delta t_{ij}^{(EI)}$ ) of Eq. (13) [79, 119, 120]. As in the E to E Hebbian time window [68–75], LTP occurs in the black region for  $\Delta t_{ij}^{(EI)} > 0$ , while LTD takes place in the gray region for  $\Delta t_{ij}^{(EI)} < 0$ . However, unlike the E to E Hebbian time window,  $\Delta J_{ij}^{(EI)} \sim 0$  near  $\Delta t_{ij}^{(EI)} \sim 0$ , and delayed maximum and minimum for  $\Delta J_{ij}^{(EI)}$  appear at  $\Delta t_{ij}^{(EI)} = \beta\tau_+$  and  $-\beta\tau_-$ , respectively.

$\Delta J_{ij}^{(EI)}$  ( $\Delta t_{ij}^{(EI)}$ ) varies depending on the relative time

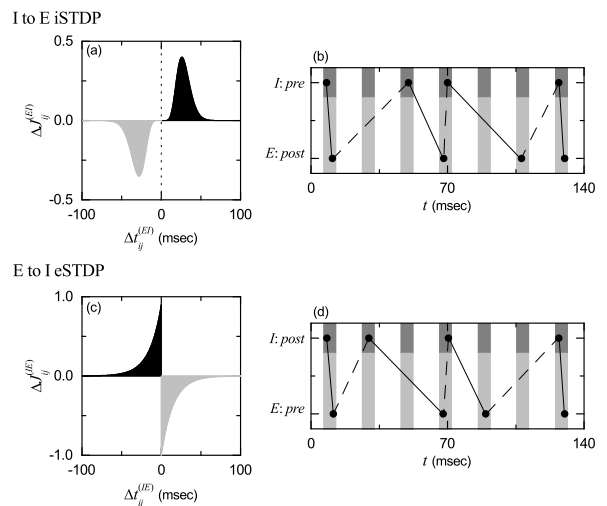

FIG. 6: Time windows for the interpopulation STDPs and schematic diagrams for the nearest-spike pair-based interpopulation STDP rules. (a) Time window for the delayed Hebbian I to E iSTDP [see Eq. (13)]. Plot of synaptic modification  $\Delta J_{ij}^{(EI)}$  versus  $\Delta t_{ij}^{(EI)}$  ( $= t_i^{(post,E)} - t_j^{(pre,I)}$ ). (b) Schematic diagram for the nearest-spike pair-based I to E iSTDP rule.  $I : Pre$  and  $E : Post$  correspond to a pre-synaptic fast spiking interneuron and a post-synaptic regular spiking pyramidal cell, respectively. (c) Time window for the anti-Hebbian E to I eSTDP [see Eq. (15)]. Plot of synaptic modification  $\Delta J_{ij}^{(IE)}$  versus  $\Delta t_{ij}^{(IE)}$  ( $= t_i^{(post,I)} - t_j^{(pre,E)}$ ). (d) Schematic diagram for the nearest-spike pair-based E to I eSTDP rule.  $E : Pre$  and  $I : Post$  correspond to a pre-synaptic regular spiking pyramidal cell and a post-synaptic fast spiking interneuron, respectively. Solid and dashed lines denote LTP [iLTP in (b) and eLTP in (d)] and LTD [iLTD in (b) and eLTD in (d)], respectively.

difference  $\Delta t_{ij}^{(EI)}$  ( $= t_i^{(post,E)} - t_j^{(pre,I)}$ ) between the nearest spike times of the post-synaptic regular spiking pyramidal cell  $i$  and the pre-synaptic fast spiking interneuron  $j$ . When a post-synaptic spike follows a pre-synaptic spike (i.e.,  $\Delta t_{ij}^{(EI)}$  is positive), inhibitory LTP (iLTP) of I to E synaptic strength appears; otherwise (i.e.,  $\Delta t_{ij}^{(EI)}$  is negative), inhibitory LTD (iLTD) occurs. A schematic diagram for the nearest-spike pair-based I to E iSTDP rule is given in Fig. 6(b), where  $I : Pre$  and  $E : Post$  correspond to a pre-synaptic fast spiking interneuron and a post-synaptic regular spiking pyramidal cell, respectively. Here, gray and light gray boxes represent I- and E-stripes in the raster plot of spikes, respectively, and spikes in the stripes are denoted by black solid circles.

When the post-synaptic regular spiking pyramidal cell ( $E : Post$ ) fires a spike, iLTP (represented by solid lines) occurs via I to E iSTDP between the post-synaptic spike and the previous nearest pre-synaptic spike of the fast spiking interneuron ( $I : Pre$ ). In contrast, when the pre-synaptic fast spiking interneuron ( $I : Pre$ ) fires a spike, iLTD (denoted by dashed lines) occurs through I to E iSTDP between the pre-synaptic spike and the previous



nearest post-synaptic spike of the regular spiking pyramidal cell ( $E: Post$ ). In the case of fast sparse synchronization, individual neurons make stochastic phase lockings (i.e., they make intermittent spikings phase-locked to the instantaneous population spike rate at random multiples of its global period). As a result of stochastic phase lockings (leading to stochastic spike skipings), nearest-neighboring pre- and post-synaptic spikes may appear in any two separate stripes (e.g., nearest-neighboring, next-nearest-neighboring or farther-separated stripes), as well as in the same stripe, in contrast to the case of full synchronization where they appear in the same or just in the nearest-neighboring stripes [compare Fig. 6(b) with Fig. 4(b) (corresponding to the case of full synchronization) in [80]]. For simplicity, only the cases, corresponding to the same, the nearest-neighboring, and the next-nearest-neighboring stripes, are shown in Fig. 6(b).

Next, we consider the case of E to I eSTDP. Figure 6(c) shows an anti-Hebbian time window for the synaptic modification  $\Delta J_{ij}^{(IE)} (\Delta t_{ij}^{(IE)})$  of Eq. (15) [67, 121, 122]. Unlike the case of the I to E time-delayed Hebbian time window [79, 119, 120], LTD occurs in the gray region for  $\Delta t_{ij}^{(IE)} > 0$ , while LTP takes place in the black region for  $\Delta t_{ij}^{(IE)} < 0$ . Furthermore, the anti-Hebbian time window for E to I eSTDP is in contrast to the Hebbian time window for the E to E eSTDP [68–75], although both cases correspond to the same excitatory synapses (i.e., the type of time window may vary depending on the type of target neurons of excitatory synapses).

The synaptic modification  $\Delta J_{ij}^{(IE)} (\Delta t_{ij}^{(IE)})$  changes depending on the relative time difference  $\Delta t_{ij}^{(IE)}$  ( $= t_i^{(post,I)} - t_j^{(pre,E)}$ ) between the nearest spike times of the post-synaptic fast spiking interneurons  $i$  and the pre-synaptic regular spiking pyramidal cell  $j$ . When a post-synaptic spike follows a pre-synaptic spike (i.e.,  $\Delta t_{ij}^{(IE)}$  is positive), excitatory LTD (eLTD) of E to I synaptic strength occurs; otherwise (i.e.,  $\Delta t_{ij}^{(IE)}$  is negative), excitatory LTP (eLTP) appears. A schematic diagram for the nearest-spike pair-based E to I eSTDP rule is given in Fig. 6(d), where  $E: Pre$  and  $I: Post$  correspond to a pre-synaptic regular spiking pyramidal cell and a post-synaptic fast spiking interneuron, respectively. As in the case of I to E iSTDP in Fig. 6(b), gray and light gray boxes denote I- and E-stripes in the raster plot, respectively, and spikes in the stripes are represented by black solid circles. When the post-synaptic fast spiking interneuron ( $I: Post$ ) fires a spike, eLTD (represented by dashed lines) occurs via E to I eSTDP between the post-synaptic spike and the previous nearest pre-synaptic spike of the regular spiking pyramidal cell ( $E: Pre$ ). On the other hand, when the pre-synaptic regular spiking pyramidal cell ( $E: Pre$ ) fires a spike, eLTP (denoted by solid lines) occurs through E to I eSTDP between the pre-synaptic spike and the previous nearest post-synaptic spike of the fast spiking interneuron ( $I: Post$ ). In the case of fast sparse synchronization, nearest-neighboring

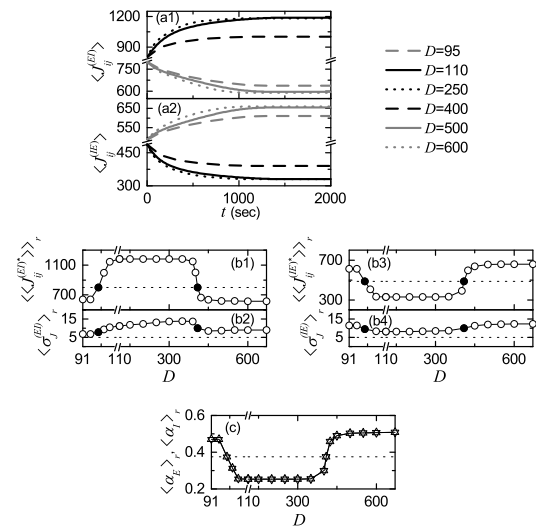

FIG. 7: Emergence of LTP and LTD in the presence of interpopulation (I to E and E to I) STDPs. Time-evolutions of population-averaged synaptic strengths (a1)  $\langle J_{ij}^{(IE)} \rangle$  and (a2)  $\langle J_{ij}^{(EI)} \rangle$  for various values of  $D$ . Plots of population-averaged saturated limit values of synaptic strengths (b1)  $\langle \langle J_{ij}^{(IE)} \rangle \rangle_r$  and (b3)  $\langle \langle J_{ij}^{(EI)*} \rangle \rangle_r$  versus  $D$ . Plots of standard deviations (b2)  $\langle \sigma_{J_{ij}^{(IE)}} \rangle_r$  and (b4)  $\langle \sigma_{J_{ij}^{(EI)}} \rangle_r$  versus  $D$ . Effect of interpopulation (I to E and E to I) STDPs on the E-I ratio balance. (c) Plots of the E-I ratios  $\langle \alpha_E \rangle_r$  (up-triangles) ( $= J_0^{(EE)} / \langle \langle J_{ij}^{(IE)} \rangle \rangle_r$ ) and  $\langle \alpha_I \rangle_r$  (down-triangles) ( $= \langle \langle J_{ij}^{(IE)} \rangle \rangle_r / J_0^{(II)}$ ).

pre- and post-synaptic spikes may appear in any two separate stripes due to stochastic spike skipping. Like the case of I to E iSTDP, only the cases, corresponding to the same, the nearest-neighboring, and the next-nearest-neighboring stripes, are shown in Fig. 6(d).

Figures 7(a1) and 7(a2) show time-evolutions of population-averaged I to E synaptic strengths  $\langle J_{ij}^{(IE)} \rangle$  and E to I synaptic strengths  $\langle J_{ij}^{(EI)} \rangle$  for various values of  $D$ , respectively. We first consider the case of  $\langle J_{ij}^{(IE)} \rangle$  whose time evolutions are governed by the time-delayed Hebbian time window. In each case of intermediate values of  $D = 110, 250$ , and  $400$  (shown in black color),  $\langle J_{ij}^{(IE)} \rangle$  increases monotonically above its initial value  $J_0^{(IE)}$  ( $=800$ ), and eventually it approaches a saturated limit value  $\langle J_{ij}^{(IE)*} \rangle$  nearly at  $t = 1500$  sec. After such a long time of adjustment ( $\sim 1500$  sec), the distribution of synaptic strengths becomes nearly stationary (i.e., equilibrated). Consequently, iLTP occurs for these values of  $D$ . On the other hand, for small and large values of  $D = 95, 500$ , and  $600$  (shown in gray color),  $\langle J_{ij}^{(IE)} \rangle$  decreases monotonically below  $J_0^{(IE)}$ , and approaches a saturated limit value  $\langle J_{ij}^{(IE)*} \rangle$ . As a result, iLTD occurs in the cases of  $D = 95, 500$  and  $600$ .

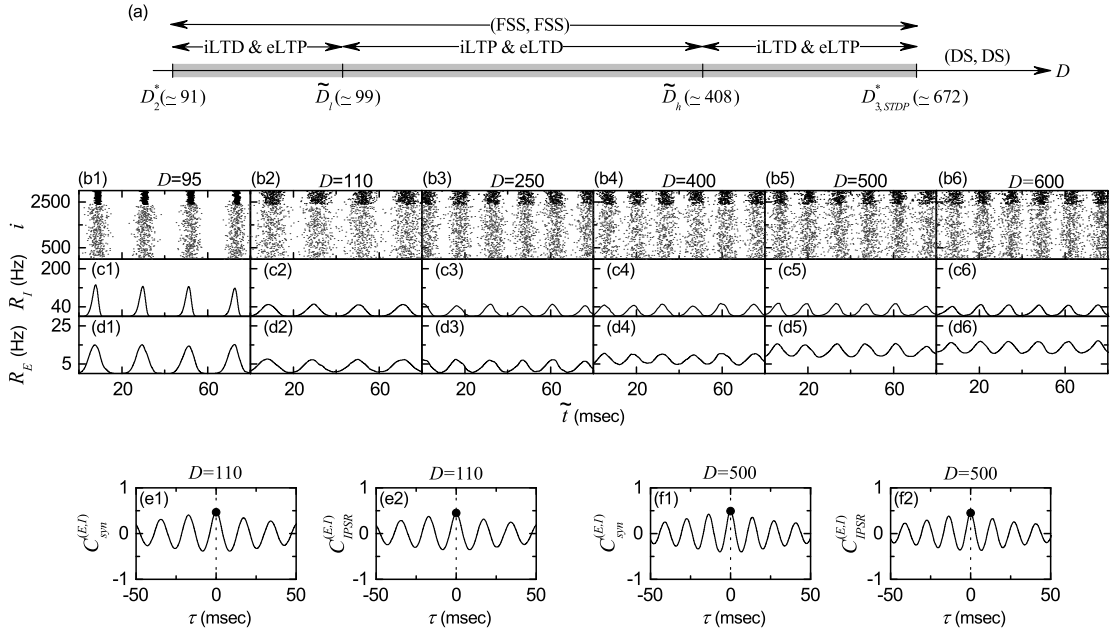

FIG. 8: Effects of interpopulation (I to E and E to I) STDPs on population states. (a) Bar diagram for the population states (I, E) in the I- and the E-populations. Raster plots of spikes in (b1)-(b6) and instantaneous population spike rates  $R_I(t)$  in (c1)-(c6) and  $R_E(t)$  in (d1)-(d6) for various values of  $D$  after the saturation time, where  $t = t^*$  (saturation time = 1500 sec) +  $\tilde{t}$ . Cross-correlation functions between total synaptic input currents  $I_{syn}^{(E)}(t)$  and  $I_{syn}^{(I)}(t)$  for  $D =$  (e1) 110 (iLTP and eLTD) and (f1) 500 (iLTD and eLTP). Cross-correlation functions between instantaneous population spike rates  $R_E(t)$  and  $R_I(t)$  for  $D =$  (e2) 110 and (f2) 500.

Next, we consider the case of  $\langle J_{ij}^{(IE)} \rangle$ . Due to the effect of anti-Hebbian time window, its time evolutions are in contrast to those of  $\langle J_{ij}^{(EI)} \rangle$ . For intermediate values of  $D = 110, 250, \text{ and } 400$  (shown in black color),  $\langle J_{ij}^{(IE)} \rangle$  decreases monotonically below its initial value  $J_0^{(IE)}$  ( $=487.5$ ), and eventually it converges toward a saturated limit value  $\langle J_{ij}^{(IE)*} \rangle$  nearly at  $t = 1500$  sec. As a result, eLTD occurs for these values of  $D$ . In contrast, for small and large values of  $D = 95, 500, \text{ and } 600$  (shown in gray color),  $\langle J_{ij}^{(IE)} \rangle$  increases monotonically above  $J_0^{(IE)}$ , and converges toward a saturated limit value  $\langle J_{ij}^{(IE)*} \rangle$ . Consequently, eLTP occurs for  $D = 95, 500$  and  $600$ .

Figure 7(b1) shows a bell-shaped plot of population-averaged saturated limit values  $\langle \langle J_{ij}^{(EI)*} \rangle \rangle_r$  (open circles) of I to E synaptic strengths versus  $D$  in a range of  $D_2^* (\simeq 91) < D < D_{3,STDP}^* (\simeq 672)$  where (FSS, FSS) appears in both the I- and the E-populations. Here, the horizontal dotted line represents the initial average value  $J_0^{(EI)}$  ( $= 800$ ) of I to E synaptic strengths. In contrast, the plot for population-averaged saturated limit values  $\langle \langle J_{ij}^{(IE)*} \rangle \rangle_r$  (open circles) of E to I synaptic strengths versus  $D$  forms a well-shaped graph, as shown in Fig. 7(b3), where the horizontal dotted line denotes the initial average value of E to I synaptic strengths  $J_0^{(IE)}$  ( $= 487.5$ ). The lower and the higher thresholds,  $\tilde{D}_l$  ( $\simeq 99$ ) and  $\tilde{D}_h$  ( $\simeq 408$ ), for LTP/LTD [where  $\langle \langle J_{ij}^{(EI)*} \rangle \rangle_r$

and  $\langle \langle J_{ij}^{(IE)*} \rangle \rangle_r$  lie on their horizontal lines (i.e., they are the same as their initial average values, respectively)] are denoted by solid circles. Thus, in the case of a bell-shaped graph for  $\langle \langle J_{ij}^{(EI)*} \rangle \rangle_r$ , iLTP occurs in a broad region of intermediate  $D$  ( $\tilde{D}_l < D < \tilde{D}_h$ ), while iLTD takes place in the other two (separate) regions of small and large  $D$  [ $D_2^* < D < \tilde{D}_l$  and  $\tilde{D}_h < D < D_{3,STDP}^*$ ]. On the other hand, in the case of a well-shaped graph for  $\langle \langle J_{ij}^{(IE)*} \rangle \rangle_r$ , eLTD takes place in a broad region of intermediate  $D$  ( $\tilde{D}_l < D < \tilde{D}_h$ ), while eLTP occurs in the other two (separate) regions of small and large  $D$  [ $D_2^* < D < \tilde{D}_l$  and  $\tilde{D}_h < D < D_{3,STDP}^*$ ].

We next consider standard deviations (from the population-averaged limit values) in the distribution of saturated limit values of interpopulation synaptic strengths. Figures 7(b2) and 7(b4) show plots of standard deviations  $\langle \sigma_J^{(EI)} \rangle_r$  and  $\langle \sigma_J^{(IE)} \rangle_r$  versus  $D$ , respectively. Here, the horizontal dotted lines represent the initial value  $\sigma_0$  ( $= 5$ ) of the standard deviations. We note that all the values of  $\langle \sigma_J^{(EI)} \rangle_r$  and  $\langle \sigma_J^{(IE)} \rangle_r$  are larger than  $\sigma_0$  ( $= 5.0$ ), independently of  $D$ .

We study the effect of combined interpopulation (both I to E and E to I) STDPs on the E-I ratios,  $\alpha_E$  and  $\alpha_I$  (given by the ratio of average excitatory to inhibitory synaptic strengths), in the E- and the I-populations;  $\alpha_E (= \langle J_{ij}^{(EE)} \rangle / \langle J_{ij}^{(EI)} \rangle)$  and  $\alpha_I (= \langle J_{ij}^{(IE)} \rangle / \langle J_{ij}^{(II)} \rangle)$ . In

the absence of STDP, there exists an E-I ratio balance between the E- and the I-populations (i.e.,  $\alpha_E = \alpha_I = 0.375$ ), and then the two fast sparsely synchronized rhythms in the I- and the E-populations are in-phase (see Fig. 3). Figure 7(c) shows plots of  $\langle \alpha_E \rangle_r$  (up-triangles) and  $\langle \alpha_I \rangle_r$  (down-triangles) versus  $D$ , respectively. We note that the E-I ratio balance is preserved (i.e.,  $\langle \alpha_E \rangle_r = \langle \alpha_I \rangle_r$ ) in the whole range of  $D$ . Thus, in the presence of combined I to E and E to I STDPs, states in our coupled two-population system are evolved into ones with the E-I ratio balance. However, the balanced E-I ratios vary depending on  $D$ , in contrast to the case without STDP where the balanced E-I ratio is a constant ( $=0.375$ ).

A bar diagram for the population states (I, E) in the I- and the E-populations is shown in Fig. 8(a). We note that (FSS, FSS) occurs in a broad range of  $D$  [ $D_2^* (\simeq 91) < D < D_{3,STDP}^* (\simeq 672)$ ], in comparison with the case without STDP where (FSS, FSS) appears for  $D_2^* < D < D_3^* (\simeq 537)$  [see Fig. 3(a)]. We note that desynchronized states for  $D_3^* < D < D_{3,STDP}^*$  in the absence of STDP are transformed into (FSS, FSS) in the presence of combined interpopulation (both I to E and E to I) STDPs, and thus the region of (FSS, FSS) is so much extended.

The effects of LTP and LTD at inhibitory and excitatory synapses on population states after the saturation time ( $t^* = 1500$  sec) may be well seen in the raster plot of spikes and the corresponding instantaneous population spike rates  $R_I(t)$  and  $R_E(t)$ . Figures 8(b1)-8(b6), Figures 8(c1)-8(c6), and Figures 8(d1)-8(d6) show raster plots of spikes, the instantaneous population spike rates  $R_I(t)$ , and the instantaneous population spike rates  $R_E(t)$  for various values of  $D$ , respectively.

In comparison with the case without STDP [see Figs. 3(b4)-3(b6), Figs. 3(c4)-3(c6), and Figs. 3(d4)-3(d6)], the degrees of (FSS, FSS) for intermediate values of  $D$  ( $D = 110, 250, \text{ and } 400$ ) are decreased (i.e., the amplitudes of  $R_I(t)$  and  $R_E(t)$  are decreased) due to increased I to E synaptic inhibition (iLTP) and decreased E to I synaptic excitation (eLTD). In contrast, for small and large values of  $D$  ( $D = 95$  and  $500$ ), the degrees of (FSS, FSS) are increased (i.e., the amplitudes of  $R_I(t)$  and  $R_E(t)$  are increased) because of decreased I to E synaptic inhibition (iLTD) and increased E to I synaptic excitation (eLTP) (for comparison, see the corresponding raster plots,  $R_I(t)$ , and  $R_E(t)$  for  $D = 95$  and  $500$  in Fig. 3). We note that a desynchronized state for  $D = 600$  in the absence of STDP [see Figs. 3(b8), 3(c8), and 3(d8)] is transformed into (FSS, FSS) [see Figs. 8(b6), 8(c6), and 8(d6)] via iLTD and eLTP. The degree of (FSS, FSS) for  $D = 600$  is also nearly the same as those for other smaller values of  $D$ , because the value of  $D = 600$  is much far away from its 3rd threshold  $D_{3,STDP}^* (\simeq 672)$ .

Here, we also note that the degree of FSS in the I-(E-)population (i.e., the amplitude of  $R_I(t)$  [ $R_E(t)$ ]) tends to be nearly the same in an extended wide range of  $\tilde{D}_l < D < D_{3,STDP}^*$ , except for the narrow small- $D$  re-

gion ( $D_2^* < D < \tilde{D}_l$ ). Hence, an equalization effect in the combined interpopulation synaptic plasticity occurs in such an extended wide range of  $D$ . Quantitative analysis for the degree of (FSS, FSS) and the equalization effect in the case of combined interpopulation (both I to E and E to I) STDP will be done intensively in Fig. 11.

As explained in Fig. 7(c), the E-I ratio balance is preserved (i.e.,  $\langle \alpha_E \rangle_r = \langle \alpha_I \rangle_r$ ) in the whole range of  $D$ . In this preserved case of E-I ratio balance, the fast sparsely synchronized rhythms in both the I- and the E-populations become in-phase. As an example of intermediate  $D$ , we consider the case of  $D = 110$  with  $\langle \alpha_E \rangle_r = \langle \alpha_I \rangle_r = 0.254$  where iLTP and eLTD occur. Figure 8(e1) shows the cross-correlation function  $C_{syn}^{(E,I)}(\tau)$  of Eq. (19) between the population-averaged total synaptic input currents  $I_{syn}^{(E)}(t)$  and  $I_{syn}^{(I)}(t)$  into the E- and the I-populations. The main peak (denoted by a solid circle) appears at  $\tau = 0$ . Hence, no phase shift between  $I_{syn}^{(E)}(t)$  and  $I_{syn}^{(I)}(t)$  occurs. As a result, the cross-correlation function  $C_{IPSR}^{(E,I)}(\tau)$  of Eq. (21) between the instantaneous population spike rate outputs  $R_E(t)$  and  $R_I(t)$  also has the main peak at  $\tau = 0$ , as shown in Fig. 8(e2). We note that the black I-strips and the gray E-strips in the raster plot of spikes are in-phase, as shown in Fig. 8(b2). Hence, both  $R_I(t)$  and  $R_E(t)$  make in-phase oscillations with the same population frequency [see Figs. 8(c2) and 8(d2)], as in the case without STDP (see Fig. 3).

As another example of large  $D$ , we consider the case of  $D = 500$  with  $\langle \alpha_E \rangle_r = \langle \alpha_I \rangle_r = 0.504$  where iLTD and eLTP occur. In this case, Figure 8(f1) shows the cross-correlation function  $C_{syn}^{(E,I)}(\tau)$  between  $I_{syn}^{(E)}(t)$  and  $I_{syn}^{(I)}(t)$ . The main peak (represented by a solid circle) appears at  $\tau = 0$ , as in the above case of  $D = 110$ . Hence, both  $I_{syn}^{(E)}(t)$  and  $I_{syn}^{(I)}(t)$  are in-phase. Consequently, the cross-correlation function  $C_{IPSR}^{(E,I)}(\tau)$  between  $R_E(t)$  and  $R_I(t)$  also has the main peak at  $\tau = 0$  [see Fig. 8(f2)]. Thus, the black I-strips and the gray E-strips in the raster plot of spikes are in-phase, as shown in Fig. 8(b5). Hence, both  $R_I(t)$  and  $R_E(t)$  make in-phase oscillations with the same population frequency [see Figs. 8(c5) and 8(d5)], as in the above case of  $D = 110$ . When compared with the case without STDP, the degrees of (FSS, FSS) for  $D = 110$  and  $500$  in the case of combined interpopulation (both I to E and E to I) STDPs are changed to become nearly the same, while their the E-I ratios continue to be balanced.

However, in the presence of only I to E iSTDP or only E to I eSTDP, the E-I ratio balance is broken up, in contrast to the combined case of interpopulation (both I to E and E to I) STDPs. We first study the effect of only I to E iSTDP on the E-I ratio balance and the phase shift between fast synchronized rhythms in the I- and the E-populations. In the presence of only I to E iSTDP, the E-I ratio  $\alpha_E$  in the (target) E-population changes, while no change in the E-I ratio  $\alpha_I (= 0.375)$  in the (source) I-population occurs. Thus, break-up of

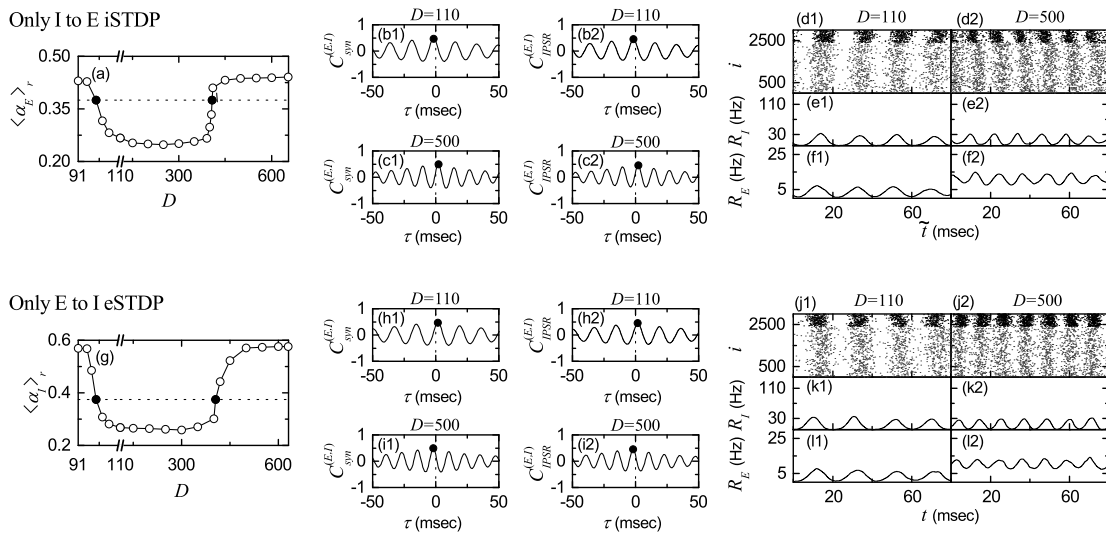

FIG. 9: Break-up of E-I ratio balance in the presence of only I to E iSTDP. (a) Plot of the E-I ratio  $\langle \alpha_E \rangle_r (= J_0^{(EE)} / \langle \langle J_{ij}^{(EI)} \rangle \rangle_r)$  versus  $D$ . Break-up of E-I ratio balance in the presence of only E to I eSTDP. (g) Plot of the E-I ratio  $\langle \alpha_I \rangle_r (= \langle \langle J_{ij}^{(IE)} \rangle \rangle_r / J_0^{(II)})$  versus  $D$ . Horizontal dotted lines in (a) and (g) represents constant E-I ratios  $\alpha_I (=0.375)$  in the case of only I to E iSTDP and  $\alpha_E (=0.375)$  in the case of E to I eSTDP, respectively. Cross-correlation functions between total synaptic input currents  $I_{syn}^{(E)}(t)$  and  $I_{syn}^{(I)}(t)$  for  $D =$  (b1) 110 (iLTP) and (c1) 500 (iLTD) [ $D =$  (h1) 110 (eLTD) and (i1) 500 (eLTP)] in the case of only I to E iSTDP (only E to I eSTDP). Cross-correlation functions between instantaneous population spike rates  $R_E(t)$  and  $R_I(t)$  for  $D =$  (b2) 110 and (c2) 500 [ $D =$  (h2) 110 and (i2) 500] in the case of only I to E iSTDP (only E to I eSTDP). Solid circles represent the maxima of the cross-correlation functions. Raster plots of spikes for  $D =$  (d1) 110 and (d2) 500 [ $D =$  (j1) 110 and (j2) 500] in the case of only I to E iSTDP (only E to I eSTDP), after the saturation time, where  $t = t^* + \tilde{t}$  (saturation time = 1500 sec) +  $\tilde{t}$ . Instantaneous population spike rates  $R_I(t)$  for  $D =$  (e1) 110 and (e2) 500 [ $D =$  (k1) 110 and (k2) 500] and  $R_E(t)$  for  $D =$  (f1) 110 and (f2) 500 [ $D =$  (l1) 110 and (l2) 500] in the case of only I to E iSTDP (only E to I eSTDP).

the E-I ratio balance occurs, in contrast to the combined case of both I to E and E to I STDPs.

Figure 9(a) shows a well-shaped plot of the E-I ratio  $\langle \alpha_E \rangle_r (= J_0^{(EE)} / \langle \langle J_{ij}^{(EI)} \rangle \rangle_r; J_0^{(EE)} = 300)$  versus  $D$  in the presence of only I to E iSTDP. In the region of intermediate  $D$  [ $\tilde{D}_{l,EI} (\simeq 99) < D < \tilde{D}_{h,EI} (\simeq 408)$ ] where iLTP occurs,  $\langle \alpha_E \rangle_r$  is decreased below the value ( $=0.375$ ) of  $\alpha_I$ , denoted by the horizontal dotted line, due to increase in I to E synaptic inhibition. Here, the values of lower and higher thresholds for LTP/LTD,  $\tilde{D}_{l,EI}$  and  $\tilde{D}_{h,EI}$ , are the same as  $\tilde{D}_l$  and  $\tilde{D}_h$  in the combined case of both I to E and E to I STDPs. Hence, in such an intermediate- $D$  region, the values of  $\langle \alpha_E \rangle_r$  become smaller than that of  $\alpha_I$ . On the other hand, in the other two separate regions of small and large  $D$  [ $D_2^* (\simeq 91) < D < \tilde{D}_{l,EI}$  and  $\tilde{D}_{h,EI} < D < D_{3,EI}^* (\simeq 656)$ ] [(FSS, FSS) appears in the region of  $D_2^* < D < D_{3,EI}^*$ ] where iLTD takes place,  $\langle \alpha_E \rangle_r$  is increased above the value ( $=0.375$ ) of  $\alpha_I$ , because of decrease in I to E synaptic inhibition. In these two regions, the values of  $\langle \alpha_E \rangle_r$  are larger than that of  $\alpha_I$ .

Due to break-up of the E-I ratio balance in the case of only I to E iSTDP, phase shifts between fast sparsely synchronized rhythms in the E- and the I-populations occur. As an example of iLTP, we consider the case of  $D = 110$  with  $\langle \alpha_E \rangle_r = 0.267$ . Figure 9(b1) shows the

cross-correlation function  $C_{syn}^{(E,I)}(\tau)$  of Eq. (19) between the population-averaged total synaptic input currents  $I_{syn}^{(E)}(t)$  and  $I_{syn}^{(I)}(t)$  into the E- and the I-populations. The main peak appears at  $\tau = -1.7$  msec, in contrast to the combined case of both I to E and E to I STDPs where  $\tau = 0$  [see Fig. 8(e1)]. Thus,  $I_{syn}^{(E)}(t)$  shows a phase advance of  $36.6^\circ$  ahead of  $I_{syn}^{(I)}(t)$ . Consequently, the cross-correlation function  $C_{IPSR}^{(E,I)}(\tau)$  of Eq. (21) between the instantaneous population spike rate outputs  $R_E(t)$  and  $R_I(t)$  also has the main peak at  $\tau = -1.7$  msec, as shown in Fig. 9(b2). This phase advance of the E-population rhythm may be well seen in Figs. 9(d1), 9(e1), and 9(f1). The gray E-stripes in the raster plot of spikes are phase-advanced with respect to the black I-stripes, and  $R_E(t)$  also makes phase-advanced oscillations with respect to  $R_I(t)$ . These phase-advanced behaviors for  $\langle \alpha_E \rangle_r < \alpha_I (= 0.375)$  in the case of iLTP are in contrast to the in-phase behaviors in the combined case of both I to E and E to I STDPs where  $\langle \alpha_E \rangle_r = \langle \alpha_I \rangle_r$ .

We also consider another case of  $D = 500$  where iLTD occurs. In this case,  $\langle \alpha_E \rangle_r = 0.437$ . Figure 9(c1) shows the cross-correlation function  $C_{syn}^{(E,I)}(\tau)$  between  $I_{syn}^{(E)}(t)$  and  $I_{syn}^{(I)}(t)$ . The main peak appears at  $\tau = 2.1$  msec, in contrast to the above case of iLTP for  $D = 110$ . Hence,  $I_{syn}^{(E)}(t)$  shows a phase lag of  $-58.2^\circ$  behind  $I_{syn}^{(I)}(t)$ . As a result, the cross-correlation function  $C_{IPSR}^{(E,I)}(\tau)$  between



$R_E(t)$  and  $R_I(t)$  also has the main peak at  $\tau = 2.1$  msec [see Fig. 9(c2)]. This phase lag of the E-population rhythm may be well seen in Figs. 9(d2), 9(e2), and 9(f2). The gray E-stripes in the raster plot of spikes are phase-delayed with respect to the black I-stripes, and  $R_E(t)$  also makes phase-delayed oscillations with respect to  $R_I(t)$ . These phase-delayed behaviors for  $\langle\alpha_E\rangle_r > \alpha_I (= 0.375)$  in the case of iLTD are in contrast to the phase-advanced behaviors for  $\langle\alpha_E\rangle_r < \alpha_I$  in the case of iLTP.

Next, we consider the case of only E to I eSTDP. Like the case of I to E iSTDP, E-I ratio balance is also broken up, and hence a phase shift between the fast sparsely synchronized rhythms in the I- and the E-populations occurs. However, the phase shift in the case of E to I eSTDP is opposite to that in the case of I to E iSTDP. In the presence of only E to I eSTDP, the E-I ratio  $\alpha_I$  in the (target) I-population changes, while no change in the E-I ratio  $\alpha_E (= 0.375)$  in the (source) E-population occurs. In this way, break-up of the E-I ratio balance occurs in an opposite way, in comparison with the case of I to E iSTDP where  $\alpha_E$  in the (target) E-population varies.

Figure 9(g) shows a well-shaped plot of the E-I ratio  $\langle\alpha_I\rangle_r (= \langle\langle J_{ij}^{(IE)} \rangle\rangle_r / J_0^{(II)}$ ;  $J_0^{(II)} = 1300$ ) versus  $D$  in the presence of only E to I eSTDP. This well-shaped graph for  $\langle\alpha_I\rangle_r$  is similar to that for  $\langle\alpha_E\rangle_r$  in the case of only I to E iSTDP [see Fig. 9(a)]. In the region of intermediate  $D$  [ $\tilde{D}_{l,IE} (\simeq 99) < D < \tilde{D}_{h,IE} (\simeq 406)$ ] where eLTD takes place,  $\langle\alpha_I\rangle_r$  is decreased below the value ( $=0.375$ ) of  $\alpha_E$ , represented by the horizontal dotted line, because of decrease in E to I synaptic excitation. Here, the value of the lower threshold for LTP/LTD,  $\tilde{D}_{l,IE}$ , is the same as  $\tilde{D}_l$  in the case of combined interpopulation (both I to E and E to I) STDPs, while the value of the higher threshold for LTP/LTD,  $\tilde{D}_{h,IE}$ , is smaller than  $\tilde{D}_h (\simeq 408)$  in the combined case of both I to E and E to I STDPs. Hence, in the intermediate- $D$  region, the values of  $\langle\alpha_I\rangle_r$  become smaller than that of  $\alpha_E (= 0.375)$ . In contrast, in the other two separate regions of small and large  $D$  [ $D_2^* (\simeq 91) < D < \tilde{D}_{l,IE}$  and  $\tilde{D}_{h,IE} < D < D_{3,IE}^* (\simeq 632)$ ] [(FSS, FSS) occurs in the region of  $D_2^* < D < D_{3,IE}^*$ ] where eLTP occurs,  $\langle\alpha_I\rangle_r$  is increased above the value ( $=0.375$ ) of  $\alpha_E$ , due to increase in E to I synaptic excitation. In these two regions, the values of  $\langle\alpha_I\rangle_r$  are larger than that of  $\alpha_E$ .

Break-up of the E-I ratio balance in the case of only E to I eSTDP is opposite to that in the case of only I to E iSTDP. In the region of intermediate  $D$ ,  $\langle\alpha_I\rangle_r < \alpha_E$  ( $\langle\alpha_E\rangle_r < \alpha_I$ ) in the case of only E to I eSTDP (only I to E iSTDP), while in the other two regions of small and large  $D$ ,  $\langle\alpha_I\rangle_r > \alpha_E$  ( $\langle\alpha_E\rangle_r > \alpha_I$ ) in the case of only E to I eSTDP (only I to E iSTDP). Hence, phase shifts between fast sparsely synchronized rhythms in the E- and the I-populations also occur in an opposite way.

As an example of intermediate  $D$ , we consider the case of  $D = 110$  with  $\langle\alpha_I\rangle_r = 0.268$  where eLTD occurs. Figure 9(h1) shows the cross-correlation function

$C_{syn}^{(E,I)}(\tau)$  of Eq. (19) between the population-averaged total synaptic input currents  $I_{syn}^{(E)}(t)$  and  $I_{syn}^{(I)}(t)$  into the E- and the I-populations. The main peak (denoted by a solid circle) appears at  $\tau = 1.6$  msec, in contrast to the case of only I to E iSTDP where  $\tau = -1.7$  msec [see Fig. 9(b1)]. Hence,  $I_{syn}^{(E)}(t)$  shows a phase lag of  $-40.3^\circ$  behind  $I_{syn}^{(I)}(t)$ . As a result, the cross-correlation function  $C_{IPSR}^{(E,I)}(\tau)$  of Eq. (21) between the instantaneous population spike rate outputs  $R_E(t)$  and  $R_I(t)$  also has the main peak at  $\tau = 1.6$  msec, as shown in Fig. 9(h2). This phase lag of the E-population rhythm may be well seen in Figs. 9(j1), 9(k1), and 9(l1). The gray E-stripes in the raster plot of spikes are phase-delayed with respect to the black I-stripes, and  $R_E(t)$  also makes phase-delayed oscillations with respect to  $R_I(t)$ . These phase-delayed behaviors for  $D = 110$  where  $\langle\alpha_I\rangle_r < \alpha_E$  are in contrast to the phase-advanced behaviors for  $D = 110$  in the case of only I to E iSTDP where  $\langle\alpha_E\rangle_r < \alpha_I$  [see Figs. 9(d1), 9(e1), and 9(f1)].

As another example of large  $D$ , we consider the case of  $D = 500$  with  $\langle\alpha_E\rangle_r = 0.571$  where eLTP occurs. In this case, Figure 9(h2) shows the cross-correlation function  $C_{syn}^{(E,I)}(\tau)$  between  $I_{syn}^{(E)}(t)$  and  $I_{syn}^{(I)}(t)$ . The main peak (represented by a solid circle) appears at  $\tau = -2.0$  msec, in contrast to the above case of eLTD for  $D = 110$ . Hence,  $I_{syn}^{(E)}(t)$  shows a phase advance of  $55.4^\circ$  ahead of  $I_{syn}^{(I)}(t)$ . Consequently, the cross-correlation function  $C_{IPSR}^{(E,I)}(\tau)$  between  $R_E(t)$  and  $R_I(t)$  also has the main peak at  $\tau = -2.0$  msec [see Fig. 9(i2)]. This phase advance of the E-population rhythm may be well seen in Figs. 9(j2), 9(k2), and 9(l2). The gray E-stripes in the raster plot of spikes are phase-advanced with respect to the black I-stripes, and  $R_E(t)$  also makes phase-advanced oscillations with respect to  $R_I(t)$ . These phase-advanced behaviors for  $\langle\alpha_I\rangle_r > \alpha_E$  are in contrast to the phase-delayed behaviors for  $D = 500$  in the case of only I to E iSTDP where  $\langle\alpha_E\rangle_r > \alpha_I$  [see Figs. 9(d2), 9(e2), and 9(f2)].

In the above way, the E-I ratio balance is broken in the case of only I to E iSTDP or only E to I eSTDP. Break-up of the E-I ratio balance in the case of only I to E iSTDP is opposite to that in the case of only I to E iSTDP. Thus, phase shifts between fast sparsely synchronized rhythms in the E- and the I-populations also occur in an opposite way. On the other hand, we note that, in the presence of combined interpopulation (both I to E and E to I) STDPs, the E-I ratio balance is recovered (i.e.,  $\langle\alpha_E\rangle_r = \langle\alpha_I\rangle_r$ ) in the whole range of  $D$  via constructive interplay between I to E iSTDP and E to I eSTDP. Hence, the two fast sparsely synchronized rhythms become in-phase.

We now study the effects of LTP and LTD at inhibitory and excitatory synapses on the population-averaged mean firing rate  $\langle\langle f_i^{(X)} \rangle\rangle_r$  ( $X = E$  or  $I$ ) and the population frequency  $\langle\langle f_p^{(X)} \rangle\rangle_r$ . The synaptic input current  $\{I_{syn,i}^{(XY)}\}$  of Eq. (9) from the source  $Y$ -population

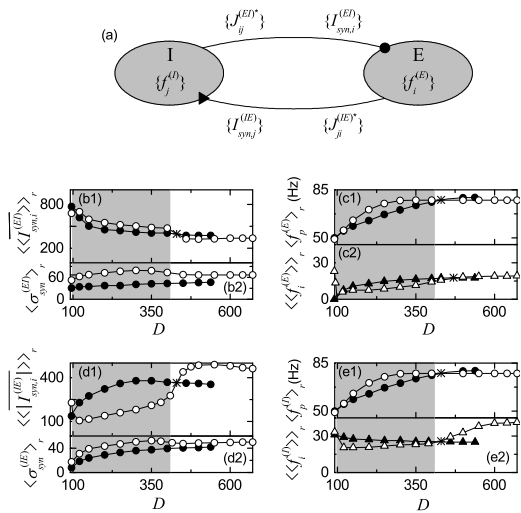

FIG. 10: Effects of interpopulation (both I to E and E to I) STDPs on population-averaged mean firing rates of individual neurons and the population frequency. (a) Schematic representation for relations between pre-synaptic mean firing rates  $\{f_j^{(Y)}\}$  of source neurons  $j$  in the  $Y$  population ( $Y = I$  or  $E$ ), saturated limit interpopulation ( $Y$  to  $X$ ) synaptic strengths  $\{J_{ij}^{(XY)*}\}$ , interpopulation ( $Y$  to  $X$ ) synaptic currents  $\{I_{syn,i}^{(XY)}\}$ , and post-synaptic mean firing rates  $\{f_i^{(X)}\}$  of target neurons  $i$  in the  $Y$  population. Plots of (b1) population average  $\langle\langle I_{syn,i}^{(EI)} \rangle\rangle_r$  (open circles) and (b2) standard deviation  $\langle\sigma_{syn}^{(EI)} \rangle_r$  (open circles) for time-averaged strengths  $\{I_{syn,i}^{(EI)}\}$  of individual I to E synaptic currents versus  $D$ ; those in the absence of STDP are represented by solid circles. Plots of (c1) the population frequency  $\langle f_p^{(E)} \rangle_r$  (open circles) and (c2) the population-averaged mean firing rate of regular spiking pyramidal cells  $\langle f_i^{(E)} \rangle_r$  (open triangles) versus  $D$  in the E-populations; those in the absence of STDP are denoted by solid circles and triangles, respectively. Plots of (d1) population average  $\langle\langle I_{syn,i}^{(IE)} \rangle\rangle_r$  (open circles) and (d2) standard deviation  $\langle\sigma_{syn}^{(IE)} \rangle_r$  (open circles) for time-averaged strengths  $\{I_{syn,i}^{(IE)}\}$  of individual E to I synaptic currents versus  $D$ ; those in the absence of STDP are represented by solid circles. Plots of (e1) the population frequency  $\langle f_p^{(I)} \rangle_r$  (open circles) and (e2) the population-averaged mean firing rate of fast spiking interneurons  $\langle f_i^{(I)} \rangle_r$  (open triangles) versus  $D$  in the I-populations; those in the absence of STDP are denoted by solid circles and triangles, respectively.

into the target  $X$ -population makes effects on mean firing rates  $\{f_i^{(X)}\}$  of post-synaptic target neurons. The main factors in  $I_{syn,i}^{(XY)}$  are both synaptic strengths  $J_{ij}^{(XY)}$  and synaptic gate functions  $s_j^{(XY)}$  of Eq. (10) (representing the fraction of open channels from the source  $Y$ -population to the target  $X$ -population). Here,  $s_j^{(XY)}$  is determined by spikings of pre-synaptic neurons in the source  $Y$ -population. Hence, both pre-synaptic mean firing rates  $\{f_j^{(Y)}\}$  of source neurons  $j$  in the  $Y$ -population and saturated limit interpopulation ( $Y$  to  $X$ ) synaptic

strengths  $\{J_{ij}^{(XY)*}\}$  make effects on interpopulation ( $Y$  to  $X$ ) synaptic currents  $\{I_{syn,i}^{(XY)}\}$  which then affect post-synaptic mean firing rates  $\{f_i^{(X)}\}$  of target neurons  $i$  in the  $X$ -population, which is schematically represented in Fig. 10(a).

We first consider the case of E-population with high dynamical susceptibility with respect to variations in I to E synaptic inputs. Figures 10(b1) and 10(b2) show plots of population average  $\langle\langle I_{syn,i}^{(EI)} \rangle\rangle_r$  (open circles) and standard deviation  $\langle\sigma_{syn}^{(EI)} \rangle_r$  (from the population average) (open circles) for time-averaged strengths  $\{I_{syn,i}^{(EI)}\}$  of individual I to E synaptic currents, respectively; for comparison, those in the absence of STDP are represented by solid circles. In this case,  $\langle\langle J_{ij}^{(EI)*} \rangle\rangle_r$  and  $\langle\langle f_i^{(I)} \rangle\rangle_r$  in Figs. 7(b1) and 10(e2) make opposite effects on  $\langle\langle I_{syn,i}^{(EI)} \rangle\rangle_r$ . In the region of iLTP of  $\langle\langle J_{ij}^{(EI)*} \rangle\rangle_r$  (increasing  $\langle\langle I_{syn,i}^{(EI)} \rangle\rangle_r$ ),  $\langle\langle f_i^{(I)} \rangle\rangle_r$  has a tendency of decreasing  $\langle\langle I_{syn,i}^{(EI)} \rangle\rangle_r$ , while in the region of iLTD of  $\langle\langle J_{ij}^{(EI)*} \rangle\rangle_r$  (decreasing  $\langle\langle I_{syn,i}^{(EI)} \rangle\rangle_r$ ),  $\langle\langle f_i^{(I)} \rangle\rangle_r$  has a tendency of increasing  $\langle\langle I_{syn,i}^{(EI)} \rangle\rangle_r$ . However, the effects of  $\langle\langle J_{ij}^{(EI)*} \rangle\rangle_r$  are found to be dominant in comparison with those of  $\langle\langle f_i^{(I)} \rangle\rangle_r$ . Hence, in the gray region of iLTP [ $\tilde{D}_l \approx 99 < D < \tilde{D}_h \approx 408$ ], the population-average values of  $\langle\langle I_{syn,i}^{(EI)} \rangle\rangle_r$  (open circles) are higher than those (solid circles) in the absence of STDP, mainly due to increase in  $\langle\langle J_{ij}^{(EI)*} \rangle\rangle_r$ . On the other hand, in most cases of iLTD for large  $D$  (except for a narrow region near the higher threshold  $\tilde{D}_h$ ), the population averages  $\langle\langle I_{syn,i}^{(EI)} \rangle\rangle_r$  (open circles) are lower than those (solid circles) in the absence of STDP, mainly because of decrease in  $\langle\langle J_{ij}^{(EI)*} \rangle\rangle_r$ .

In the (exceptional) narrow region of iLTD near the higher threshold [ $\tilde{D}_h \leq D < D_{cr,l}^* \approx 430$ ] ( $D_{cr,l}^*$ : denoted by a star), the overall effect of standard deviation  $\langle\sigma_J^{(EI)} \rangle_r$  in Fig. 7(b2) (increasing  $\langle\langle I_{syn,i}^{(EI)} \rangle\rangle_r$ ) is found to be dominant in comparison with the effect of iLTD (decreasing  $\langle\langle I_{syn,i}^{(EI)} \rangle\rangle_r$ ), and hence the population averages  $\langle\langle I_{syn,i}^{(EI)} \rangle\rangle_r$  (open circles) become higher than those (solid circles) in the absence of STDP, like the case of iLTP (in the gray region of intermediate  $D$ ). In this way, the E-population seems to have high dynamical susceptibility against variations (i.e.,  $\langle\sigma_J^{(EI)} \rangle_r$ ) in I to E synaptic strengths. After passing the crossing point  $D_{cr,l}^*$  (denoted by a star), the effect of iLTD (decreasing  $\langle\langle I_{syn,i}^{(EI)} \rangle\rangle_r$ ) becomes dominant, as in the usual case of iLTD. In addition to population averages  $\langle\langle I_{syn,i}^{(EI)} \rangle\rangle_r$ , standard deviations  $\langle\sigma_{syn}^{(EI)} \rangle_r$  are also shown in Fig. 10(b2). Unlike the case of  $\langle\langle I_{syn,i}^{(EI)} \rangle\rangle_r$ , all the values of  $\langle\sigma_{syn}^{(EI)} \rangle_r$  (open circles) are

higher than those (solid circles) in the absence of STDP, independently of  $D$ .

We study the effects of both the population average  $\langle\langle I_{syn,i}^{(EI)} \rangle\rangle_r$  and the standard deviation  $\langle\sigma_{syn}^{(EI)}\rangle_r$  on the population-averaged mean firing rate  $\langle\langle f_i^{(E)} \rangle\rangle_r$  in the E-population. Figure 10(c2) shows a plot of  $\langle\langle f_i^{(E)} \rangle\rangle_r$  versus  $D$ . In the region where  $\langle\langle I_{syn,i}^{(EI)} \rangle\rangle_r$  (open circles) is increased in comparison with those (solid circles) in the absence of STDP [ $\tilde{D}_l < D < D_{cr,l}^*$  ( $\simeq 430$ )], the population-averaged mean firing rates  $\langle\langle f_i^{(E)} \rangle\rangle_r$  (open triangles) become lower than those (solid triangles) in the absence of STDP, due to increased I to E synaptic input inhibition. On the other hand, in most other cases where  $\langle\langle I_{syn,i}^{(EI)} \rangle\rangle_r$  (open circles) is decreased, [except for a narrow region of  $D_{cr,l}^* < D < D_{cr,h}^*$  ( $\simeq 470$ )] [ $D_{cr,h}^*$ : denoted by a star in Fig. 10(c2)], the population-averaged mean firing rates  $\langle\langle f_i^{(E)} \rangle\rangle_r$  (open triangles) become higher than those (solid triangles) in the absence of STDP, because of decreased I to E synaptic input inhibition. As mentioned above, the E-population has high dynamical susceptibility with respect to variations in  $\{I_{syn,i}^{(EI)}\}$ . In the exceptional narrow region of  $D_{cr,l}^* < D < D_{cr,h}^*$ , the overall effect of standard deviation  $\langle\sigma_{syn}^{(EI)}\rangle_r$  (decreasing  $\langle\langle f_i^{(E)} \rangle\rangle_r$ ) is found to be dominant when compared with the effect of  $\langle\langle I_{syn,i}^{(EI)} \rangle\rangle_r$  (increasing  $\langle\langle f_i^{(E)} \rangle\rangle_r$ ). Hence, values of  $\langle\langle f_i^{(E)} \rangle\rangle_r$  (open circles) are lower than those (solid circles) in the absence of STDP.

We now consider the case of I-population with low dynamical susceptibility with respect to variations in E to I synaptic inputs. Figures 10(d1) and 10(d2) show plots of population average  $\langle\langle |I_{syn,i}^{(IE)}| \rangle\rangle_r$  (open circles) and standard deviation  $\langle\sigma_{syn}^{(IE)}\rangle_r$  (from the population average) (open circles) for time-averaged strengths  $\{I_{syn,i}^{(IE)}\}$  of individual E to I synaptic currents, respectively; for comparison, those in the absence of STDP are represented by solid circles. In this case,  $\langle\langle J_{ij}^{(IE)*} \rangle\rangle_r$  and  $\langle\langle f_i^{(E)} \rangle\rangle_r$  in Figs. 7(b3) and 10(c2) make nearly the same effects on  $\langle\langle |I_{syn,i}^{(IE)}| \rangle\rangle_r$ , in contrast to the above case in Fig. 10(b1) where  $\langle\langle J_{ij}^{(EI)*} \rangle\rangle_r$  and  $\langle\langle f_i^{(I)} \rangle\rangle_r$  make opposite effects on  $\langle\langle |I_{syn,i}^{(EI)}| \rangle\rangle_r$ . Hence, changing tendencies in  $\langle\langle |I_{syn,i}^{(IE)}| \rangle\rangle_r$  are the same as those in  $\langle\langle f_i^{(E)} \rangle\rangle_r$ , except for a narrow region of  $D_{cr,m}^*$  ( $\simeq 440$ )  $< D < D_{cr,h}^*$  ( $\simeq 470$ ) [ $D_{cr,m}^*$ : denoted by a star in Fig. 10(d1)]. Due to the effects of  $\langle\langle J_{ij}^{(IE)*} \rangle\rangle_r$ , such changing tendencies become intensified (i.e., the differences from those in the absence of STDP become much larger), and also  $\langle\langle |I_{syn,i}^{(IE)}| \rangle\rangle_r$  becomes increased rapidly by passing a crossing point  $D_{cr,m}^*$  (lower than  $D_{cr,h}^*$ ). Along with population averages  $\langle\langle |I_{syn,i}^{(IE)}| \rangle\rangle_r$ , standard deviations  $\langle\sigma_{syn}^{(IE)}\rangle_r$  are also shown in Fig. 10(d2). Like the

case of  $\langle\sigma_{syn}^{(EI)}\rangle_r$  in Fig. 10(b2), all the values of  $\langle\sigma_{syn}^{(IE)}\rangle_r$  (open circles) are higher than those (solid circles) in the absence of STDP, independently of  $D$ .

We study the effects of both the population average  $\langle\langle |I_{syn,i}^{(IE)}| \rangle\rangle_r$  and the standard deviation  $\langle\sigma_{syn}^{(IE)}\rangle_r$  on the population-averaged mean firing rate  $\langle\langle f_i^{(I)} \rangle\rangle_r$  and the population frequency  $\langle f_p^{(I)} \rangle_r$  in the I-population. Figures 10(e1) and 10(e2) shows plots of  $\langle f_p^{(I)} \rangle_r$  and  $\langle\langle f_i^{(I)} \rangle\rangle_r$  versus  $D$ , respectively. We note that the I-population is a dominant one in our coupled two-population system, and it has low dynamical susceptibility against variations  $\langle\sigma_{syn}^{(IE)}\rangle_r$  in time-averaged strengths in the E to I synaptic currents. Hence, effects of time-averaged strengths of individual E to I synaptic input currents on the I-population are given mainly by their population average  $\langle\langle |I_{syn,i}^{(IE)}| \rangle\rangle_r$  (i.e., effects of standard deviation  $\langle\sigma_{syn}^{(IE)}\rangle_r$  may be neglected). Thus, population-averaged mean firing rates  $\langle\langle f_i^{(I)} \rangle\rangle_r$  (open circles) are lower than those (solid circles) in the absence of STDP for  $\tilde{D}_l < D < D_{cr,m}^*$  ( $\simeq 440$ ), because of decrease in  $\langle\langle |I_{syn,i}^{(IE)}| \rangle\rangle_r$ . As a result of decreased  $\langle\langle f_i^{(I)} \rangle\rangle_r$ , the population frequency  $\langle f_p^{(I)} \rangle_r$  (open circles) becomes higher than that (solid circles) in the absence of STDP. In contrast, in the other two separate regions ( $D_2^* < D < \tilde{D}_l$  and  $D_{cr,m}^* < D < D_{3,STDP}^*$ ), population-averaged mean firing rates  $\langle\langle f_i^{(I)} \rangle\rangle_r$  (open circles) are higher than those (solid circles) in the absence of STDP, due to increase in  $\langle\langle |I_{syn,i}^{(IE)}| \rangle\rangle_r$ . Because of increased  $\langle\langle f_i^{(I)} \rangle\rangle_r$ , the population frequency  $\langle f_p^{(I)} \rangle_r$  (open circles) become lower than that (solid circles) in the absence of STDP. We also note that the population frequency in our coupled two-population system is determined by the dominant I-population. Hence, the population frequency  $\langle f_p^{(I)} \rangle_r$  in Fig. 10(c1) is the same as  $\langle f_p^{(I)} \rangle_r$ .

In a wide range of  $\tilde{D}_l < D < D_{3,STDP}^*$ , a weak equalization effect is found to appear in the population frequency  $\langle f_p^{(I)} \rangle_r$  ( $= \langle f_p^{(E)} \rangle_r$ ), because the standard deviation in the distribution of  $\langle f_p^{(X)} \rangle_r$  ( $X=I$  or  $E$ ) in the presence of combined interpopulation (both I to E and E to I) STDPs becomes decreased, in comparison to that in the absence of STDP. Particularly, for  $D > 300$  the values of  $\langle f_p^{(X)} \rangle_r$  are nearly the same (i.e., the curve for  $\langle f_p^{(X)} \rangle_r$  is nearly flat). However, this kind of equalization effect in  $\langle f_p^{(X)} \rangle_r$  is weak in comparison with strong equalization effect in the synchronization degree [denoted by the amplitudes of  $R_I(t)$  and  $R_E(t)$ ] in the I- and the E-populations. In contrast to the case of  $\langle f_p^{(X)} \rangle_r$ , non-equalization effects are found to occur in the population-averaged mean firing rates  $\langle\langle f_i^{(I)} \rangle\rangle_r$  and  $\langle\langle f_i^{(E)} \rangle\rangle_r$  and in the population averages  $\langle\langle |I_{syn,i}^{(IE)}| \rangle\rangle_r$  and  $\langle\langle |I_{syn,i}^{(EI)}| \rangle\rangle_r$  for time-averaged strengths of interpopulation synaptic cur-



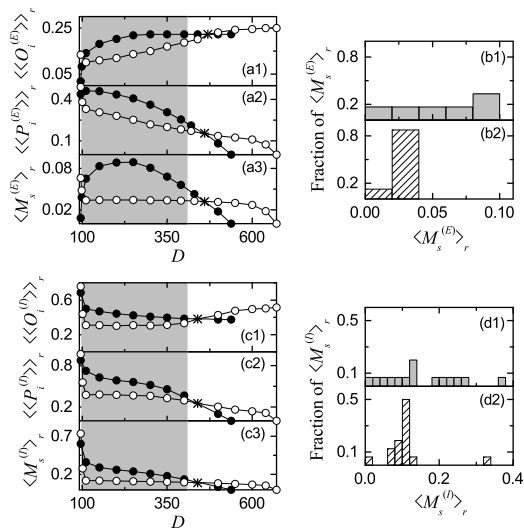

FIG. 11: Characterization of fast sparse synchronization in the presence of interpopulation (both I to E and E to I) STDPs. Plots of (a1) the average occupation degree  $\langle\langle O_i^{(E)} \rangle\rangle_r$  (open circles), (a2) the average pacing degree  $\langle\langle P_i^{(E)} \rangle\rangle_r$  (open circles), and (a3) the statistical-mechanical spiking measure  $\langle M_s^{(E)} \rangle_r$  (open circles) versus  $D$  in the E-population. Histograms for distribution of statistical-mechanical spiking measures  $\langle M_s^{(E)} \rangle_r$  in the E-population in the (b1) absence and the (b2) presence of interpopulation (both I to E and E to I) STDPs. Plots of (c1) the average occupation degree  $\langle\langle O_i^{(I)} \rangle\rangle_r$  (open circles), (c2) the average pacing degree  $\langle\langle P_i^{(I)} \rangle\rangle_r$  (open circles), and (c3) the statistical-mechanical spiking measure  $\langle M_s^{(I)} \rangle_r$  (open circles) versus  $D$  in the I-population. For comparison,  $\langle\langle O_i^{(X)} \rangle\rangle_r$ ,  $\langle\langle P_i^{(X)} \rangle\rangle_r$ , and  $\langle M_s^{(X)} \rangle_r$  ( $X = E$  or  $I$ ) in the absence of STDP are also denoted by solid circles. Histograms for distribution of statistical-mechanical spiking measures  $\langle M_s^{(I)} \rangle_r$  in the I-population in the (d1) absence and the (d2) presence of interpopulation (both I to E and E to I) STDPs.

rents, because their distributions have increased standard deviations, in comparison with those in the absence of STDP.

In an extended wide region of (FSS, FSS) for  $D_2^* (\simeq 91) < D < D_{3,STDP}^* (\simeq 672)$ , we characterize population and individual behaviors for (FSS, FSS) in both the I- and the E-populations, and make comparison with those in the case without STDP. Population behaviors for fast sparse synchronization in each  $X$ -population ( $X = E$  or  $I$ ) are characterized in terms of the average occupation degree  $\langle\langle O_i^{(X)} \rangle\rangle_r$ , the average pacing degree  $\langle\langle P_i^{(X)} \rangle\rangle_r$ , and the statistical-mechanical spiking measure  $\langle M_s^{(X)} \rangle_r$ . As explained in the subsection III A,  $\langle\langle O_i^{(X)} \rangle\rangle_r$  represents average density of spikes in the stripes in the raster plot,  $\langle\langle P_i^{(X)} \rangle\rangle_r$  denotes average phase coherence of spikes in the stripes, and  $\langle M_s^{(X)} \rangle_r$  (given by a product of occupation and pacing degrees) represents overall degree of fast sparse synchronization. Here, the average occupation

degree  $\langle\langle O_i^{(X)} \rangle\rangle_r$  is mainly determined by population-averaged mean firing rates  $\langle\langle f_i^{(X)} \rangle\rangle_r$ , and thus they have strong correlations with the Pearson's correlation coefficient  $r \simeq 1.0$ .

We first consider the case of E-population which has high dynamical susceptibility with respect to variations  $\langle\sigma_{syn}^{(EI)} \rangle_r$  in I to E synaptic input currents. Figures 11(a1)-11(a3) show plots of  $\langle\langle O_i^{(E)} \rangle\rangle_r$ ,  $\langle\langle P_i^{(E)} \rangle\rangle_r$ , and  $\langle M_s^{(E)} \rangle_r$ , respectively. In the gray region of iLTP [ $\tilde{D}_l (\simeq 99) < D < \tilde{D}_h (\simeq 408)$ ], the average occupation degrees  $\langle\langle O_i^{(E)} \rangle\rangle_r$  and the average pacing degrees  $\langle\langle P_i^{(E)} \rangle\rangle_r$  (open circles) are lower than those (solid circles) in the absence of STDP, mainly due to increased I to E synaptic input current  $\langle\langle I_{syn,i}^{(EI)} \rangle\rangle_r$ . On the other hand, in most cases of iLTD for large  $D$  (except for a narrow region near the higher threshold  $\tilde{D}_h$ ),  $\langle\langle O_i^{(E)} \rangle\rangle_r$  and  $\langle\langle P_i^{(E)} \rangle\rangle_r$  (open circles) are higher than those (solid circles) in the absence of STDP, mainly because of decreased I to E synaptic input current  $\langle\langle I_{syn,i}^{(EI)} \rangle\rangle_r$ .

In the (exceptional) narrow region of iLTD near the higher threshold [ $\tilde{D}_h \leq D < D_{cr}^*$ ] [ $D_{cr}^*$  (denoted by stars)  $\simeq 470$  (450) in the case of  $\langle\langle O_i^{(E)} \rangle\rangle_r$  ( $\langle\langle P_i^{(E)} \rangle\rangle_r$ )], the overall effect of (increased) standard deviation  $\langle\sigma_{syn}^{(EI)} \rangle_r$  (decreasing  $\langle\langle O_i^{(E)} \rangle\rangle_r$  and  $\langle\langle P_i^{(E)} \rangle\rangle_r$ ) is found to be dominant in comparison with the effect of decreased I to E synaptic input current  $\langle\langle I_{syn,i}^{(EI)} \rangle\rangle_r$  (increasing  $\langle\langle O_i^{(E)} \rangle\rangle_r$  and  $\langle\langle P_i^{(E)} \rangle\rangle_r$ ). Hence, in the exceptional narrow region,  $\langle\langle O_i^{(E)} \rangle\rangle_r$  and  $\langle\langle P_i^{(E)} \rangle\rangle_r$  (open circles) become lower than those (solid circles) in the absence of STDP.

We are concerned about a broad region of  $\tilde{D}_l (\simeq 99) < D < D_{3,STDP}^* (\simeq 672)$  (including the regions of both intermediate and large  $D$ ). In this region,  $\langle\langle O_i^{(E)} \rangle\rangle_r$  is a relatively fast-increasing function of  $D$  (consisting of open circles), and shows a non-equalization effect, because the standard deviation in the distribution of  $\langle\langle O_i^{(E)} \rangle\rangle_r$  is increased in comparison to that in the absence of STDP. In contrast,  $\langle\langle P_i^{(E)} \rangle\rangle_r$  is a relatively slowly-decreasing function of  $D$  (consisting of open circles) and exhibits a weak equalization effect, because the standard deviation in the distribution of  $\langle\langle P_i^{(E)} \rangle\rangle_r$  is decreased in comparison with that in the case without STDP.

The statistical-mechanical spiking measure  $\langle M_s^{(E)} \rangle_r$  is given by a product of the occupation and the pacing degrees which exhibit increasing and decreasing behaviors with  $D$ , respectively. In the region of intermediate  $D$ , the degrees of good synchronization (solid circles) in the absence of STDP become decreased to lower ones (open circles), while in the region of large  $D$  the degrees of bad synchronization (solid circles) in the absence of STDP get increased to higher values (open circles). Via the effects of iLTD, even desynchronized states in the absence of STDP are transformed into sparsely synchronized states in the range of  $D_3^* (\simeq 537) < D <$



$D_{3,STDP}^*$  ( $\simeq 672$ ), and hence the region of FSS is so much extended in the presence of both I to E and E to I STDPs. In this way, through cooperative interplay between the weak equalization effect in (decreasing)  $\langle\langle P_i^{(E)} \rangle\rangle_r$  and the non-equalization effect in (increasing)  $\langle\langle O_i^{(E)} \rangle\rangle_r$ , strong equalization effect in the spiking measure  $\langle M_s^{(E)} \rangle_r$  with much smaller standard deviation is found to occur [i.e., the values of  $\langle M_s^{(E)} \rangle_r$  in Fig. 11(a3) are nearly the same], which is markedly in contrast to the Matthew (bipolarization) effect in the intrapopulation (I to I and E to E) STDPs where good (bad) synchronization gets better (worse) [80, 83]. Thus, a bell-shaped curve (consisting of solid circles) for  $\langle M_s^{(E)} \rangle_r$  in the absence of STDP is transformed into a nearly flat curve (composed of open circles) in the presence of combined I to E and E to I STDPs.

This kind of equalization effect may be well seen in the histograms for the distribution of  $\langle M_s^{(E)} \rangle_r$ . The gray histogram in the absence of STDP is shown in Fig. 11(b1) and the hatched histogram in the presence of combined I to E and E to I STDPs is given in Fig. 11(b2). The standard deviation ( $\simeq 0.007$ ) in the hatched histogram is much smaller than that ( $\simeq 0.028$ ) in the gray histogram. Hence, strong equalization effect occurs in an extended broad region of  $\tilde{D}_l$  ( $\simeq 99$ )  $< D < D_{3,STDP}^*$  ( $\simeq 672$ ). Furthermore, a dumbing-down effect also occurs because the mean value ( $\simeq 0.029$ ) in the hatched histogram is smaller than that ( $\simeq 0.056$ ) in the gray histogram.

We now consider the case of I-population which has low dynamical susceptibility with respect to variations  $\langle\sigma_{syn}^{(IE)}\rangle_r$  in E to I synaptic input currents. Figures 11(c1)-11(c3) show plots of  $\langle\langle O_i^{(I)} \rangle\rangle_r$ ,  $\langle\langle P_i^{(I)} \rangle\rangle_r$ , and  $\langle M_s^{(I)} \rangle_r$  in the I-population, respectively. As explained in the case of  $\langle\langle f_i^{(I)} \rangle\rangle_r$  [see Fig. 10(e2)], effects of time-averaged strengths of individual E to I synaptic input currents on the I-population are given mainly by their population average  $\langle\langle |I_{syn,i}^{(IE)}| \rangle\rangle_r$ , and hence effects of standard deviation  $\langle\sigma_{syn}^{(IE)}\rangle_r$  may be neglected. In the region of  $\tilde{D}_l < D < D_{cr}^*$  ( $\simeq 440$ ) where values of  $\langle\langle |I_{syn,i}^{(IE)}| \rangle\rangle_r$  (open circles) are lower than those in the absence of STDP, the values of  $\langle\langle O_i^{(I)} \rangle\rangle_r$  (open circles) are lower than those (solid circles) in the absence of STDP, due to decreased E to I synaptic input current, and their variations are small in this region. On the other hand, in the other two separate regions (i.e.,  $D_2^* < D < \tilde{D}_l$  and  $D_{cr}^* < D < D_{3,STDP}^*$  where values of  $\langle\langle |I_{syn,i}^{(IE)}| \rangle\rangle_r$  (open circles) are higher than those in the absence of STDP, the values of  $\langle\langle O_i^{(I)} \rangle\rangle_r$  (open circles) are higher than those (solid circles) in the absence of STDP, due to increased E to I synaptic input current, and  $\langle\langle O_i^{(I)} \rangle\rangle_r$  increases with  $D$  in a relatively fast way. Thus, the standard deviation in the distribution of  $\langle\langle O_i^{(I)} \rangle\rangle_r$  is increased in comparison to that in the absence of STDP, and  $\langle\langle O_i^{(I)} \rangle\rangle_r$  exhibits a non-equalization

effect, as in the case of  $\langle\langle f_i^{(I)} \rangle\rangle_r$ .

We next consider behaviors of  $\langle\langle P_i^{(I)} \rangle\rangle_r$ . In the region of  $\tilde{D}_l < D < D_{cr}^*$  ( $\simeq 440$ ) where the values of  $\langle\langle |I_{syn,i}^{(IE)}| \rangle\rangle_r$  are decreased, the values of  $\langle\langle P_i^{(I)} \rangle\rangle_r$  (open circles) are also lower than those (solid circles) in the absence of STDP and their variations are small in this region. In contrast, in the other two separate regions (i.e.,  $D_2^* < D < \tilde{D}_l$  and  $D_{cr}^* < D < D_{3,STDP}^*$ ) where the values of  $\langle\langle |I_{syn,i}^{(IE)}| \rangle\rangle_r$  are increased, the values of  $\langle\langle P_i^{(I)} \rangle\rangle_r$  (open circles) are also higher than those (solid circles) in the absence of STDP, and  $\langle\langle P_i^{(I)} \rangle\rangle_r$  decreases with  $D$  in a relatively slow way, in contrast to the case without STDP. Thus, the standard deviation in the distribution of  $\langle\langle P_i^{(I)} \rangle\rangle_r$  is decreased in comparison with that in the absence of STDP, and  $\langle\langle P_i^{(I)} \rangle\rangle_r$  shows a weak equalization effect, like the case of  $\langle f_p^{(I)} \rangle_r$ .

The statistical-mechanical spiking measure  $\langle M_s^{(I)} \rangle_r$  in the I-population is given by a product of the occupation and the pacing degrees which exhibit increasing and decreasing behaviors with  $D$ , respectively. In the region of intermediate  $D$ , the degrees of good synchronization (solid circles) in the absence of STDP get decreased to lower ones (open circles), while in the region of large  $D$  the degrees of bad synchronization (solid circles) in the absence of STDP become increased to higher values (open circles). Through the effects of eLTP, even desynchronized states in the absence of STDP become transformed into sparsely synchronized states in the range of  $D_3^*$  ( $\simeq 537$ )  $< D < D_{3,STDP}^*$  ( $\simeq 672$ ), and hence the region of FSS is so much extended in the presence of combined I to E and E to I STDP. As in the case of  $\langle M_s^{(E)} \rangle_r$ , via cooperative interplay between the weak equalization effect in (decreasing)  $\langle\langle P_i^{(I)} \rangle\rangle_r$  and the non-equalization effect in (increasing)  $\langle\langle O_i^{(I)} \rangle\rangle_r$ , strong equalization effect in the spiking measure  $\langle M_s^{(I)} \rangle_r$  with much smaller standard deviation is found to occur [i.e., the values of  $\langle M_s^{(I)} \rangle_r$  in Fig. 11(c3) are nearly the same], which is distinctly in contrast to the Matthew (bipolarization) effect in the intrapopulation (I to I and E to E) STDPs where good (bad) synchronization gets better (worse) [80, 83].

This kind of equalization effect may also be well seen in the histograms for the distribution of  $\langle M_s^{(I)} \rangle_r$ . The gray histogram in the absence of STDP is shown in Fig. 11(d1) and the hatched histogram in the presence of combined I to E and E to I STDP is given in Fig. 11(d2). The standard deviation ( $\simeq 0.056$ ) in the hatched histogram is much smaller than that ( $\simeq 0.112$ ) in the gray histogram. Thus, strong equalization effect also occurs in the I-population in an extended broad region of  $\tilde{D}_l$  ( $\simeq 99$ )  $< D < D_{3,STDP}^*$  ( $\simeq 672$ ), as in the case of E-population. Moreover, a dumbing-down effect also occurs because the mean value ( $\simeq 0.111$ ) in the hatched histogram is smaller than that ( $\simeq 0.162$ ) in the gray histogram.

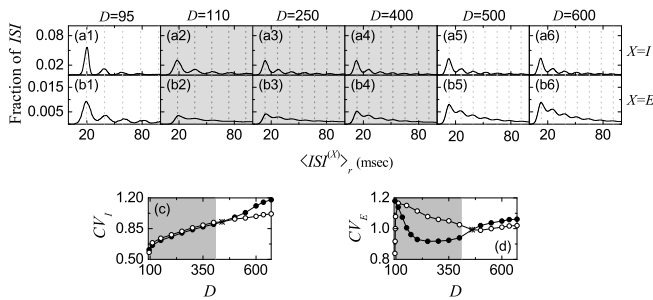

FIG. 12: Characterization of individual spiking behaviors in the presence of interpopulation (both I to E and E to I) STDPs. ISI histograms for various values of  $D$  in the I-population [(a1)-(a6)] and the E-population [(b1)-(b6)]. Vertical dotted lines in (a1)-(a6) and (b1)-(b6) represent multiples of the global period  $T_G^{(X)}$  of the instantaneous population spike rate  $R_X(t)$  ( $X = I$  or  $E$ ). Plots of the coefficient of variation  $CV_X$  (open circles) versus  $D$ ;  $X =$  (c)  $I$  and (d)  $E$ . For comparison, the coefficients of variation in the absence of STDP are represented by solid circles.

From now on, we characterize individual spiking behaviors of fast spiking interneurons and regular spiking pyramidal cells, and compare them with those in the case without STDP. Figures 12(a1)-12(a6) [Figures 12(b1)-12(b6)] show ISI histograms for various values of  $D$  in the I-(E)-population. Because of stochastic spike skipings, multiple peaks appear at integer multiples of the global period  $T_G^{(X)}$  of  $R_X(t)$  ( $X = I$  or  $E$ ), as in the case without STDP [see Figs. 5(b1)-5(b6) and Figs. 5(c1)-5(c6)]. For intermediate values of  $D$  ( $=110, 250$ , and  $400$ ), ISI histograms are shaded in gray color. In this case of intermediate  $D$ , iLTP and eLTD occur, and they tend to make single cells fire in a more stochastic and sparse way. Thus, in these gray-shaded histograms, the 1st-order main peaks become lowered and broadened, higher-order peaks also become wider, and thus mergings between multiple peaks are more developed, when compared with those in the absence of STDP. Hence, in comparison with those in the case without STDP, the average ISIs  $\langle \langle ISI^{(X)} \rangle_r \rangle$  ( $X = I$  or  $E$ ) become increased, because of the developed tail part. Consequently, population-averaged mean firing rates  $\langle \langle f_i^{(X)} \rangle_r \rangle$  (corresponding to the reciprocals of  $\langle \langle ISI^{(X)} \rangle_r \rangle$ ) are decreased, as shown in Figs. 10(c2) and 10(e2). These individual spiking behaviors make some effects on population behaviors. Due to decrease in  $\langle \langle f_i^{(X)} \rangle_r \rangle$ , spikes become more sparse, and hence the average occupation degree  $\langle \langle O_i^{(X)} \rangle_r \rangle$  in the spiking stripes in the raster plots becomes decreased [see Figs. 11(a1) and 11(c1)]. Also, because of the enhanced merging between peaks (i.e., due to increase in the irregularity degree of individual spikings), spiking stripes in the raster plots in Figs. 8(b2)-8(b4) become more smeared, and hence the average pacing degrees  $\langle \langle P_i^{(X)} \rangle_r \rangle$  of spikes in the stripes get decreased [see Figs. 11(a2) and 11(c2)].

In contrast, for small and large  $D$  ( $= 95, 500$ , and  $600$ )

iLTD and eLTP occur, and they tend to make individual neurons fire in a less stochastic and sparse way. Due to the effects of iLTD and eLTP, ISI histograms have much more clear peaks in comparison with those in the absence of STDP. Particularly, for  $D = 600$  single-peaked broad ISI histograms in the absence of STDP are transformed into multi-peaked ISI histograms in the presence of combined I to E and E to I STDPs, because desynchronization in the case without STDP is transformed into fast sparse synchronization in the combined case of both I to E and E to I STDPs. When compared with those in the absence of STDP, the average ISIs  $\langle \langle ISI^{(X)} \rangle_r \rangle$  ( $X = I$  or  $E$ ) are decreased due to enhanced lower-order peaks. As a result, population-averaged mean firing rates  $\langle \langle f_i^{(X)} \rangle_r \rangle$  are increased [see Figs. 10(c2) and 10(e2)]. Because of increase in  $\langle \langle f_i^{(X)} \rangle_r \rangle$ , the degrees of stochastic spike skipping get decreased, and hence the average occupation degrees  $\langle \langle O_i^{(X)} \rangle_r \rangle$  become increased [see Figs. 11(a1) and 11(c1)]. Also, due to appearance of clear peaks, spiking stripes in the raster plots in Figs. 8(b1), 8(b5) and 8(b6) become less smeared, and thus the average pacing degrees  $\langle \langle P_i^{(X)} \rangle_r \rangle$  become increased, as shown in Figs. 11(a2) and 11(c2).

We also study the effects of combined I to E and E to I STDPs on the coefficients of variation (characterizing irregularity degree of individual single-cell firings) in the region of (FSS, FSS) for  $D_2^* (\simeq 91) < D < D_{3,STDP}^* (\simeq 672)$ , and compare them with those in the case without STDP [see Figs. 5(d) and 5(e)]. Figures 12(c) and 12(d) show plots of the coefficients of variations (open circles),  $CV_I$  and  $CV_E$ , for the I- and the E-populations versus  $D$ , respectively; for comparison, the coefficients of variations (solid circles) in the absence of STDP are also given. Here, the intermediate regions of  $\tilde{D}_l (\simeq 99) < D < \tilde{D}_h (\simeq 408)$  are shaded in gray color. In the gray-shaded region of intermediate  $D$ , iLTP and eLTD occur. Then, due to the effects of iLTP and eLTD (tending to increase irregularity degree of single-cell firings), the values of coefficients (open circles) become higher than those (solid circles) in the absence of STDP. On the other hand, in the other two separate regions of small and large  $D$ , iLTD and eLTP occur which tend to decrease irregularity degree of single-cell spike discharges. Hence, the values of coefficients (open circles) become lower than those (solid circles) in the absence of STDP, in contrast to the case of intermediate  $D$ .

As in the case without STDP, we also examine the correlations between the reciprocals of coefficients of variation (denoting the regularity degree of single-cell spike discharges) and the spiking measures  $\langle M_s^{(X)} \rangle_r$  (representing the overall synchronization degree of fast sparse synchronization) in both the I- and the E-populations ( $X = I$  and  $E$ ). Some positive correlations are thus found in the I- and the E-populations with the Pearson's correlation coefficient  $r \simeq 0.858$  and  $0.226$ , respectively. However, these correlations in the presence of combined STDPs are reduced, in comparison with those in the ab-

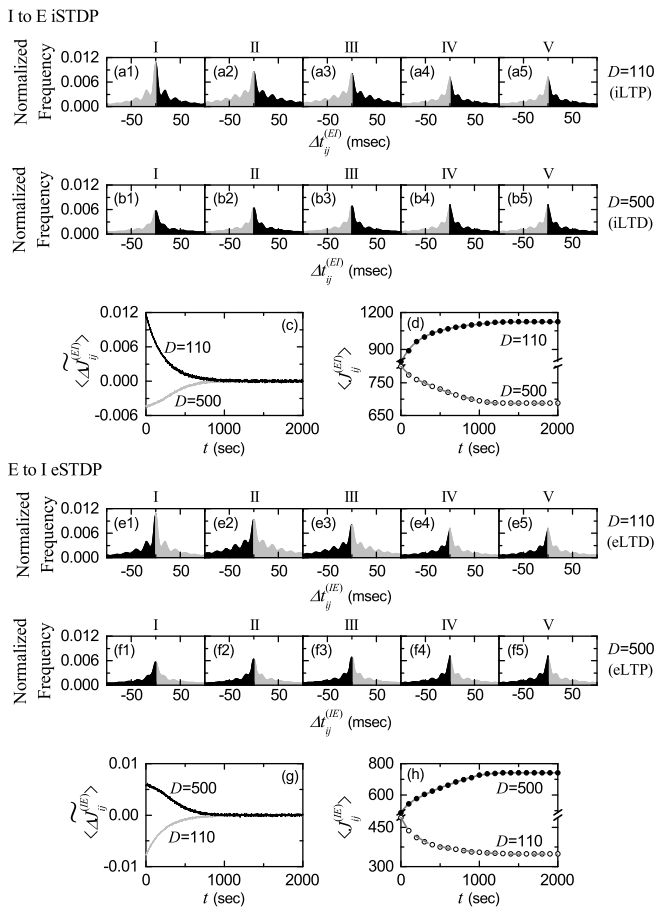

FIG. 13: Microscopic investigations on emergences of LTP and LTD in the presence of interpopulation (both I to E and E to I) STDPs. I to E iSTDP: time-evolutions of the normalized histogram  $H(\Delta t_{ij}^{(EI)})$  for the distributions of time delays  $\{\Delta t_{ij}^{(EI)}\}$  between the pre- and the post-synaptic spike times for  $D = 110$  (iLTP) in (a1)-(a5) and for  $D = 500$  (iLTD) in (b1)-(b5); 5 stages are shown in I (starting from 0 sec), II (starting from 100 sec), III (starting from 400 sec), IV (starting from 800 sec), and V (starting from 1300 sec). (c) Time-evolutions of multiplicative synaptic modification  $\langle \Delta J_{ij}^{(EI)} \rangle$  for  $D = 110$  (black line) and  $D = 500$  (gray line). (d) Time-evolutions of population-averaged synaptic strength  $\langle J_{ij}^{(EI)} \rangle$  (obtained by an approximate method) for  $D = 110$  (solid circle) and  $D = 500$  (open circle). E to I eSTDP: time-evolutions of the normalized histogram  $H(\Delta t_{ij}^{(IE)})$  for the distributions of time delays  $\{\Delta t_{ij}^{(IE)}\}$  between the pre- and the post-synaptic spike times for  $D = 110$  (eLTD) in (e1)-(e5) and for  $D = 500$  (eLTP) in (f1)-(f5); 5 stages are shown, as in the above case of I to E iSTDP. (g) Time-evolutions of multiplicative synaptic modification  $\langle \Delta J_{ij}^{(IE)} \rangle$  for  $D = 110$  (gray line) and  $D = 500$  (black line). (h) Time-evolutions of population-averaged synaptic strength  $\langle J_{ij}^{(IE)} \rangle$  (obtained by an approximate method) for  $D = 110$  (open circle) and  $D = 500$  (solid circle).

sense of STDP, mainly due to appearance of strong equalization effects in  $\langle M_s^{(X)} \rangle_r$ . In the presence of both I to E and E to I STDPs, standard deviations in the distributions of coefficients of variation are a little decreased, and hence weak equalization effects occur in both the I- and the E-populations, in contrast to strong equalization effects in  $\langle M_s^{(X)} \rangle_r$ .

Finally, we make an intensive investigation on emergences of LTP and LTD in combined I to E and E to I STDPs through a microscopic method based on the distributions of time delays  $\{\Delta t_{ij}^{(XY)}\}$  ( $= t_i^{(post,X)} - t_j^{(pre,Y)}$ ) between the nearest spike times of the post-synaptic neuron  $i$  in the  $X$ -population and the pre-synaptic neuron  $j$  in the  $Y$ -population. We first consider the case of I to E iSTDP. Figures 13(a1)-13(a5) and Figs. 13(b1)-13(b5) show time-evolutions of normalized histograms  $H(\Delta t_{ij}^{(EI)})$  for the distributions of time delays  $\{\Delta t_{ij}^{(EI)}\}$  for  $D = 110$  and  $500$ , respectively; the bin size in each histogram is 0.5 msec. Here, we consider 5 stages, represented by I (starting from 0 sec), II (starting from 100 sec), III (starting from 400 sec), IV (starting from 800 sec), and V (starting from 1300 sec). At each stage, we obtain the distribution of  $\{\Delta t_{ij}^{(EI)}\}$  for all synaptic pairs during 0.2 sec and get the normalized histogram by dividing the distribution with the total average number of synapses ( $=96000$ ).

In a case of iLTP for  $D = 110$ , multiple peaks appear in each histogram, which is similar to the case of multi-peaked ISI histogram. As explained in Fig. 6(b), due to stochastic spike skipings, nearest-neighboring pre- and post-synaptic spikes appear in any two separate stripes (e.g., nearest-neighboring, next-nearest-neighboring or farther-separated stripes), as well as in the same stripe. In the stage I, in addition to the sharp main central (1st-order) peak, higher  $k$ th-order ( $k = 2, \dots, 5$ ) left and right minor peaks also are well seen. Here, iLTP and iLTD occur in the black ( $\Delta t^{(EI)} > 0$ ) and the gray ( $\Delta t^{(EI)} < 0$ ) parts, respectively. As the time  $t$  is increased (i.e., with increase in the level of stage), the 1st-order main peak becomes lowered and widened, higher-order peaks also become broadened, and thus mergings between multiple peaks occur. Thus, at the final stage V, the histogram is composed of lowered and broadened 1st-order peak and merged higher-order minor peaks. In the stage I, the effect in the right black part (iLTP) is dominant, in comparison with the effect in the left gray part (iLTD), and hence the overall net iLTP begins to emerge. As the level of stage is increased, the effect of iLTP in the black part tends to nearly cancel out the effect of iLTD in the gray part at the stage V.

In a case of iLTD for  $D = 500$ , in the initial stage I, the histogram consists of much lowered and widened 1st-order main peak and higher-order merged peaks, in contrast to the case of  $D = 110$ . For this initial stage, the effect in the left gray part (iLTD) is dominant, in comparison with the effect in the right black part (iLTP), and hence the overall net iLTD begins to occur. However,



with increasing the level of stage, the heights of peaks become increased, their widths tend to be narrowed, and thus peaks (particularly, main peak) become more clear, which is in contrast to the progress in the case of  $D = 110$ . Moreover, the effect of iLTD in the gray part tends to nearly cancel out the effect of iLTP in the black part at the stage V. We also note that the two initially-different histograms for both  $D = 110$  (iLTP) and 500 (iLTD) are evolved into similar ones at the final stage V [see Figs. 12(a5) and 12(b5)], which shows the equalization effect occurring in the I to E synaptic plasticity.

We consider successive time intervals  $I_k \equiv (t_k, t_{k+1})$ , where  $t_k = 0.2 \cdot (k-1)$  sec ( $k = 1, 2, 3, \dots$ ). With increasing the time  $t$ , in each  $k$ th time interval  $I_k$ , we get the  $k$ th normalized histogram  $H_k(\Delta t_{ij}^{(EI)})$  ( $k = 1, 2, 3, \dots$ ) via the distribution of  $\{\Delta t_{ij}^{(EI)}\}$  for all synaptic pairs during 0.2 sec. Then, from Eq. (12), we get the population-averaged synaptic strength  $\langle J_{ij}^{(XY)} \rangle_k$  recursively:

$$\langle J_{ij}^{(XY)} \rangle_k = \langle J_{ij}^{(XY)} \rangle_{k-1} + \delta \cdot \langle \widetilde{\Delta J_{ij}^{(XY)}}(\Delta t_{ij}^{(XY)}) \rangle_k. \quad (29)$$

Here,  $X = E$  (post-synaptic population),  $Y = I$  (pre-synaptic population),  $\langle J_{ij}^{(EI)} \rangle_0 = J_0^{(EI)}$  ( $=800$ : initial mean value),  $\langle \dots \rangle_k$  in the 2nd term means the average over the distribution of time delays  $\{\Delta t_{ij}^{(XY)}\}$  for all synaptic pairs in the  $k$ th time interval, and the multiplicative synaptic modification  $\widetilde{\Delta J_{ij}^{(XY)}}(\Delta t_{ij}^{(XY)})$  is given by the product of the multiplicative factor  $(J^* - J_{ij}^{(XY)})$  [ $J_{ij}^{(XY)}$ : synaptic coupling strength at the  $(k-1)$ th stage] and the absolute value of synaptic modification  $|\Delta J_{ij}^{(XY)}(\Delta t_{ij}^{(XY)})|$ :

$$\widetilde{\Delta J_{ij}^{(XY)}}(\Delta t_{ij}^{(XY)}) = (J^* - J_{ij}^{(XY)}) |\Delta J_{ij}^{(XY)}(\Delta t_{ij}^{(XY)})|. \quad (30)$$

Here, we obtain the population-averaged multiplicative synaptic modification  $\langle \widetilde{\Delta J_{ij}^{(XY)}}(\Delta t_{ij}^{(XY)}) \rangle_k$  for the  $k$ th stage through a population-average approximation where  $J_{ij}^{(XY)}$  is replaced by its population average  $\langle J_{ij}^{(XY)} \rangle_{k-1}$  at the  $(k-1)$ th stage:

$$\langle \widetilde{\Delta J_{ij}^{(XY)}}(\Delta t_{ij}^{(XY)}) \rangle_k \simeq (J^* - \langle J_{ij}^{(XY)} \rangle_{k-1}) \langle |\Delta J_{ij}^{(XY)}(\Delta t_{ij}^{(XY)})| \rangle_k. \quad (31)$$

Here,  $\langle |\Delta J_{ij}^{(XY)}(\Delta t_{ij}^{(XY)})| \rangle_k$  may be easily got from the  $k$ th normalized histogram  $H_k(\Delta t_{ij}^{(XY)})$ :

$$\langle |\Delta J_{ij}^{(XY)}(\Delta t_{ij}^{(XY)})| \rangle_k \simeq \sum_{\text{bins}} H_k(\Delta t_{ij}^{(XY)}) \cdot |\Delta J_{ij}^{(XY)}(\Delta t_{ij}^{(XY)})|. \quad (32)$$

Using Eqs. (29), (31), and (32), we get approximate values of  $\langle \widetilde{\Delta J_{ij}^{(XY)}} \rangle_k$  and  $\langle J_{ij}^{(XY)} \rangle_k$  in a recursive way.

Figure 13(c) shows time-evolutions of  $\langle \widetilde{\Delta J_{ij}^{(EI)}} \rangle$  for  $D = 110$  (black curve) and  $D = 500$  (gray curve).  $\langle \widetilde{\Delta J_{ij}^{(EI)}} \rangle$  for  $D = 110$  is positive, while  $\langle \widetilde{\Delta J_{ij}^{(EI)}} \rangle$  for  $D = 500$  is negative. For both cases they converge toward nearly zero at the stage V (starting from 1300 sec) because the effects of iLTP and iLTD in the normalized histograms are nearly cancelled out. The time-evolutions of  $\langle J_{ij}^{(EI)} \rangle$  for  $D = 110$  (solid circles) and  $D = 500$  (open circles) are also shown in Fig. 13(d). We note that the approximately-obtained values for  $\langle J_{ij}^{(EI)} \rangle$  agree well with directly-obtained ones [denoted by the gray solid (dashed) line for  $D = 110$  (500)] in Fig. 7(a1). As a result, iLTP (iLTD) emerges for  $D = 110$  (500).

As in the case of I to E iSTDP, we now study emergences of eLTD and eLTP in E to I eSTDP via a microscopic method based on the distributions of time delays  $\{\Delta t_{ij}^{(IE)}\}$  ( $= t_i^{(post,I)} - t_j^{(pre,E)}$ ) between the nearest spike times of the post-synaptic fast spiking interneuron  $i$  and the pre-synaptic regular spiking pyramidal cell  $j$ .

Figures 13(e1)-13(e5) and Figs. 13(f1)-13(f5) show time-evolutions of normalized histograms  $H(\Delta t_{ij}^{(IE)})$  for the distributions of time delays  $\{\Delta t_{ij}^{(IE)}\}$  for  $D = 110$  and 500, respectively; the bin size in each histogram is 0.5 msec. Here, we also consider 5 stages, as in the case of the above I to E iSTDP. At each stage, we get the distribution of  $\{\Delta t_{ij}^{(IE)}\}$  for all synaptic pairs during 0.2 sec and obtain the normalized histogram by dividing the distribution with the total average number of synapses ( $=96000$ ).

As an example of eLTD in the region of intermediate  $D$ , we consider the case of  $D = 110$ . Due to stochastic spike skipplings for fast spike skipplings, multiple peaks appear in each histogram, as in the multi-peaked ISI histograms. In the stage I, along with the sharp main central (1st-order) peak, higher  $k$ th-order ( $k = 2, \dots, 5$ ) left and right minor peaks also are well seen. Because of the anti-Hebbian time window for the E to I eSTDP, eLTD and eLTP occur in the gray ( $\Delta t^{(IE)} > 0$ ) and the black ( $\Delta t^{(IE)} < 0$ ) parts, respectively, which is in contrast to the case of I to E iSTDP with a time-delayed Hebbian time window where iLTP and iLTD occur in the black ( $\Delta t^{(IE)} > 0$ ) and the gray ( $\Delta t^{(IE)} < 0$ ) parts, respec-



tively [see Figs. 6(a) and 6(c)]. With increasing the level of stage, the 1st-order main peak becomes lowered and broadened, higher-order peaks also become widened, and thus mergings between multiple peaks occur. Thus, at the final stage V, the histogram consists of lowered and widened 1st-order peak and merged higher-order minor peaks. In the stage I, the effect in the right gray part (eLTD) is dominant, in comparison to the effect in the left black part (eLTP), and hence the overall net eLTD begins to appear. As the level of stage is increased, the effect of eLTD in the gray part tends to nearly cancel out the effect of eLTP in the black part at the stage V.

We consider another case of  $D = 500$  where eLTP occurs. In the initial stage I, the histogram is composed of much lowered and broadened 1st-order main peak and higher-order merged peaks, in contrast to the case of  $D = 110$ . For this initial stage, the effect in the left black part (eLTP) is dominant, when compared with the effect in the right gray part (eLTD), and hence the overall net eLTP begins to occur. However, as the level of stage is increased, the heights of peaks become increased, their widths tend to be narrowed, and thus peaks become more clear, in contrast to the progress in the case of  $D = 110$ . Furthermore, the effect of eLTP in the black part tends to nearly cancel out the effect of eLTD in the gray part at the stage V. We also note that the two initially-different histograms in the cases of  $D = 110$  and 500 are developed into similar ones at the final stage V [see Figs. 13(e5) and 13(f5)], which shows the equalization effect occurring in the case of E to I eSTDP.

As in the case of I to E iSTDP, we consider successive time intervals  $I_k \equiv (t_k, t_{k+1})$ , where  $t_k = 0.2 \cdot (k - 1)$  sec ( $k = 1, 2, 3, \dots$ ). As the time  $t$  is increased, in each  $k$ th time interval  $I_k$ , we obtain the  $k$ th normalized histogram  $H_k(\Delta t_{ij}^{(IE)})$  ( $k = 1, 2, 3, \dots$ ) through the distribution of  $\{\Delta t_{ij}^{(IE)}\}$  for all synaptic pairs during 0.2 sec. Then, using Eqs. (29), (31), and (32), we obtain approximate values of multiplicative synaptic modification  $\langle \Delta \widetilde{J}_{ij}^{(IE)} \rangle_k$  and population-averaged synaptic strength  $\langle J_{ij}^{(IE)} \rangle_k$  in a recursive way. Figure 13(g) shows time-evolutions of  $\langle \Delta \widetilde{J}_{ij}^{(IE)} \rangle$  for  $D = 110$  (gray curve) and  $D = 500$  (black curve).  $\langle \Delta \widetilde{J}_{ij}^{(IE)} \rangle$  for  $D = 110$  is negative, while  $\langle \Delta \widetilde{J}_{ij}^{(IE)} \rangle$  for  $D = 500$  is positive. For both cases they converge toward nearly zero at the stage V (starting from 1300 sec) because the effects of eLTP and eLTD in the normalized histograms are nearly cancelled out. The time-evolutions of  $\langle J_{ij}^{(IE)} \rangle$  for  $D = 110$  (open circles) and  $D = 500$  (solid circles) are also shown in Fig. 13(h). We note that the approximately-obtained values for  $\langle J_{ij}^{(IE)} \rangle$  agree well with directly-obtained ones [represented by the gray dashed (solid) line for  $D = 110$  (500)] in Fig. 7(a2). Consequently, eLTD (eLTP) emerges for  $D = 110$  (500), in contrast to the case of I to E iSTDP where iLTP (iLTD) occurs for  $D = 110$  (500).

#### IV. SUMMARY AND DISCUSSION

We are interested in fast sparsely synchronized brain rhythms, related to diverse cognitive functions. In most cases of previous works, emergence of fast sparsely synchronized rhythms and their properties have been studied for static synaptic strengths (i.e., without considering synaptic plasticity) in single-population networks of purely inhibitory interneurons and in two-population networks composed of inhibitory interneurons and excitatory pyramidal cells [27, 44–48]. Only in one case [83], intrapopulation I to I iSTDP was considered in an inhibitory small-world network of fast spiking interneurons. In contrast to these previous works, in the present work, we took into consideration adaptive dynamics of interpopulation (both I to E and E to I) synaptic strengths, governed by the I to E iSTDP and the E to I eSTDP, respectively. We considered clustered small-world networks with both I- and E-populations. The inhibitory small-world network is composed of fast spiking interneurons, and the excitatory small-world network consists of regular spiking pyramidal cells. A time-delayed Hebbian time window has been used for the I to E iSTDP update rule, while an anti-Hebbian time window has been employed for the E to I eSTDP update rule.

By varying the noise intensity  $D$ , we have investigated the effects of interpopulation STDPs on diverse population and individual properties of fast sparsely synchronized rhythms that emerge in both the I- and the E-populations for the combined case of both I to E and E to I STDPs. In the presence of interpopulation STDPs, the distribution of interpopulation synaptic strengths  $\{J_{ij}^{(XY)}\}$  is evolved into a saturated one after a sufficiently long time of adjustment. Depending on  $D$ , the mean  $\langle \langle J_{ij}^{(XY)*} \rangle \rangle_r$  for saturated limit interpopulation synaptic strengths has been found to increase or decrease [i.e., emergence of LTP or LTD]. These LTP and LTD make effects on the degree of fast sparse synchronization.

In the case of I to E iSTDP, increase (decrease) in the mean  $\langle \langle J_{ij}^{(EI)*} \rangle \rangle_r$  of the I to E synaptic inhibition has been found to disfavor (favor) fast sparse synchronization [i.e. iLTP (iLTD) tends to decrease (increase) the degree of fast sparse synchronization]. In contrast, the roles of LTP and LTD are reversed in the case of E to I eSTDP. In this case, eLTP (eLTD) in the E to I synaptic excitation has been found to favor (disfavor) fast sparse synchronization [i.e., increase (decrease) in the mean  $\langle \langle J_{ij}^{(IE)*} \rangle \rangle_r$  tends to increase (decrease) the degree of fast sparse synchronization]. Particularly, desynchronized states for  $D_3^* (\simeq 537) < D < D_{3,STDP}^* (\simeq 672)$  in the absence of STDP become transformed into fast sparsely synchronized ones via iLTD and eLTP in the presence of interpopulation STDPs, and hence the region of fast sparse synchronization is so much extended.

An equalization effect in interpopulation (both I to E and E to I) synaptic plasticity has been found to occur in such an extended wide range of  $D$ . In a broad region

of intermediate  $D$ , the degree of good synchronization in the  $X$ -population ( $X = I$  or  $E$ ) (with higher spiking measure  $\langle M_s^{(X)} \rangle_r$ ) gets decreased, while in a region of large  $D$ , the degree of bad synchronization (with lower  $\langle M_s^{(X)} \rangle_r$ ) becomes increased. As a result, the degree of fast sparse synchronization in each I- or E-population becomes nearly the same in a wide range of  $D$ . Due to the equalization effect in interpopulation STDPs, fast sparsely synchronized rhythms, associated with diverse cognitive functions, seem to be evolved into stable and robust ones (i.e., less sensitive ones) against external noise in an extended wide range of  $D$  (including both the intermediate and the large  $D$ ). This kind of equalization effect in interpopulation synaptic plasticity is markedly in contrast to the Matthew (bipolarization) effect in intrapopulation (I to I and E to E) synaptic plasticity where good (bad) synchronization becomes better (worse) [80, 83]. In this case of Matthew effect, in a broad region of intermediate  $D$ , sparsely synchronized rhythms are so much enhanced due to a constructive effect of intrapopulation STDPs to increase their synchronization degrees, while in a region of large  $D$  they are so much depressed or they are transformed into desynchronized states due to a destructive effect of intrapopulation STDPs to decrease their synchronization degrees. In this way, a distinct bipolarization effect occurs in the case of intrapopulation STDPs.

We note that the spiking measure is given by the product of the occupation (representing density of spiking stripes) and the pacing (denoting phase coherence between spikes) degrees of spikes. Due to interpopulation STDPs, the average pacing degree  $\langle \langle P_i^{(X)} \rangle \rangle_r$  has been found to exhibit a kind of weak equalization effect (i.e.,  $\langle \langle P_i^{(X)} \rangle \rangle_r$  is a relatively slowly-decreasing function of  $D$  with a smaller standard deviation, in comparison with  $\langle \langle P_i^{(X)} \rangle \rangle_r$  in the absence of STDP). On the other hand, the average occupation degree  $\langle \langle O_i^{(X)} \rangle \rangle_r$  has been found to show a type of non-equalization effect (i.e.,  $\langle \langle O_i^{(X)} \rangle \rangle_r$  is an increasing function of  $D$  with a larger standard deviation, when compared with  $\langle \langle O_i^{(X)} \rangle \rangle_r$  in the absence of STDP). Through cooperative interplay between the weak equalization effect in (decreasing)  $\langle \langle P_i^{(X)} \rangle \rangle_r$  and the non-equalization effect in (increasing)  $\langle \langle O_i^{(X)} \rangle \rangle_r$ , strong equalization effect in  $\langle M_s^{(X)} \rangle_r$  with much smaller standard deviation has been found to emerge (i.e., the curve for  $\langle M_s^{(X)} \rangle_r$  becomes nearly flat in a wide range of  $D$ ).

This kind of equalization effect can be well visualized in the histograms for the spiking measures in the presence and in the absence of interpopulation STDPs. In each I- or E-population, the standard deviation from the mean in the histogram in the case of interpopulation STDPs has been found to be much smaller than that in the case without STDP, which clearly shows emergence of the equalization effect in both the I- and the E-populations. Moreover, a dumbing-down effect in interpopulation synaptic plasticity has also been found to occur in the I- and the

E-populations, because the mean in the histogram in the case of interpopulation STDPs is smaller than that in the absence of STDP. Thus, in each I- or E-population, equalization effect occurs together with dumbing-down effect.

Equalization effect has also been found in the population frequency  $\langle f_p^{(X)} \rangle_r$  ( $X = I$  or  $E$ ) of fast sparsely synchronized rhythms. The values of  $\langle f_p^{(X)} \rangle_r$  are nearly the same in a broad range of large  $D$  in the presence of combined I to E and E to I STDPs. On the other hand, population-averaged mean firing rate  $\langle \langle f_i^{(X)} \rangle \rangle_r$  of individual neurons has been found to exhibit non-equalization effects, like the case of  $\langle \langle O_i^{(X)} \rangle \rangle_r$ , and they have strong correlation with a large Pearson's correlation coefficient.

We note that the I-population is a dominant one in our coupled two-population system. Hence, the effects of I to E iSTDP are stronger than those of E to I eSTDP. For example, the population frequency of fast sparsely synchronized rhythms in both the I- and the E-populations is determined by the dominant I-population, and hence  $\langle f_p^{(E)} \rangle_r$  is just the same as  $\langle f_p^{(I)} \rangle_r$ . Particularly, the I-population has low dynamical susceptibility with respect to variations in E to I synaptic input currents, while the E-population has high dynamical susceptibility with respect to variations I to E synaptic input currents. Hence, the standard deviation  $\langle \sigma_{syn}^{(EI)} \rangle_r$  makes some effects on  $\langle \langle f_i^{(E)} \rangle \rangle_r$ ,  $\langle \langle O_i^{(E)} \rangle \rangle_r$ ,  $\langle \langle P_i^{(E)} \rangle \rangle_r$ , and  $\langle M_s^{(E)} \rangle_r$  in the E-population, while the effects of the standard deviation  $\langle \sigma_{syn}^{(IE)} \rangle_r$  on the individual and population behaviors in the I-population may be negligible in comparison with the effects of the population average  $\langle \langle I_{syn,i}^{(IE)} \rangle \rangle_r$ .

We have also studied the effect of interpopulation STDPs on the E-I ratio [given by the ratio of average excitatory (AMPA) to inhibitory (GABA) synaptic strengths] and the phase shift between fast sparsely synchronized rhythms in the E- and the I-populations. In the absence of STDP, we considered the case where the E-I ratios  $\alpha_E$  and  $\alpha_I$  are the same in both regular spiking pyramidal cells and fast spiking interneurons. In this case of E-I ratio balance ( $\alpha_E = \alpha_I$ ), the two E- and I-population rhythms are in-phase. In the combined case of both I to E and E to I STDPs, the E-I ratio balance (i.e.,  $\langle \alpha_E \rangle_r = \langle \alpha_I \rangle_r \equiv \alpha$ ) has been found to be preserved, and no phase-shift occurs between the E- and the I-population rhythms. In this case, the balanced E-I ratio  $\alpha(D)$  forms a well-shaped curve with respect to  $D$ , in contrast to the constant  $\alpha (= 0.375)$  in the absence of STDP. However, in the individual case of only I to E or only E to I STDP, the E-I ratio balance is broken up, and thus phase shift between fast sparsely synchronized rhythms in the I- and the E-populations occurs. The phase shifts in the case of only I to E iSTDP are opposite to those in the case of only E to I eSTDP. In contrast, in the combined case of both I to E and E to I STDPs, the E-I ratio balance has been recovered via cooperative interplay between the two interpopulation STDPs.

In addition to population behaviors, effects of combined I to E and E to I STDPs on individual spiking behaviors have been investigated. In the case of I to E iSTDP, iLTP (iLTD) has been found to increase (decrease) irregularity degree of individual single-cell spike discharges [i.e., due to iLTP (iLTD), single cells tend to fire more (less) irregularly and sparsely]. On the other hand, in the case of E to I eSTDP, the roles of LTP and LTD are reversed. Hence, irregularity degree of individual single-cell firings has been found to decrease (increase) due to eLTP (eLTD) [i.e., because of eLTP (eLTD), single cells tend to make firings less (more) irregularly and sparsely].

LTP and LTD in both I to E and E to I STDPs make effects on distributions of ISIs. In the case of fast sparse synchronization, multi-peaked ISI histograms appear due to stochastic spike skipings, in contrast to the case of full synchronization with a single-peaked ISI histogram. In the region of intermediate  $D$ , due to the effects of iLTP and eLTD, the 1st-order main peaks become lowered and widened, higher-order peaks also become broader, and thus mergings between multiple peaks are more developed, in comparison with those in the absence of STDP. Thus, the average ISIs  $\langle\langle ISI^{(X)} \rangle_r\rangle$  ( $X = I$  or  $E$ ) become increased, because of the developed tail part. As a result, population-averaged mean firing rates  $\langle\langle f_i^{(X)} \rangle_r\rangle$  (corresponding to the reciprocals of  $\langle\langle ISI^{(X)} \rangle_r\rangle$ ) get decreased. On the other hand, in the region of small and large  $D$ , because of the effects of iLTD and eLTP, ISI histograms have much more clear peaks when compared with those in the absence of STDP. As a result, the average ISIs  $\langle\langle ISI^{(X)} \rangle_r\rangle$  ( $X = I$  or  $E$ ) become decreased due to enhanced lower-order peaks. Consequently, population-averaged mean firing rates  $\langle\langle f_i^{(X)} \rangle_r\rangle$  get increased.

Furthermore, effects of both I to E and E to I STDPs on the coefficients of variation (characterizing the irregularity degree of individual single-cell spike discharge) have also been studied in both the I- and the E-populations. In the intermediate region where iLTP and eLTD occurs, irregularity degrees of individual single-cell firings increase, and hence the coefficients of variation become increased. In contrast, in the other two separate regions of small and large  $D$  where iLTD and eLTP occur, the degrees of irregularity of individual spikings decrease, and hence the coefficients of variation get decreased. Reciprocals of coefficients of variation (representing the regularity degree of individual single-cell firings) have also been found to have positive correlations with the spiking measures (denoting the overall synchronization degree of fast sparse synchronization).

Particularly, emergences of LTP and LTD of interpopulation synaptic strengths were investigated via a microscopic method, based on the distributions of time delays  $\{\Delta t_{ij}^{(XY)}\}$  between the nearest spiking times of the

post-synaptic neuron  $i$  in the (target)  $X$ -population and the pre-synaptic neuron  $j$  in the (source)  $Y$ -population. Time evolutions of normalized histograms  $H(\Delta t_{ij}^{(XY)})$  were followed in both cases of LTP and LTD. We note that, due to the equalization effects, the normalized histograms (in both cases of LTP and LTD) at the final (evolution) stage are nearly the same, which is in contrast to the cases of intrapopulation (I to I and E to E) STDPs where the two normalized histograms at the final stage are distinctly different because of the Matthew (bipolarization) effect; in the cases of intrapopulation STDPs, see Fig. 8 in [80] and Fig. 8 in [83]. Employing a recurrence relation, we recursively obtained population-averaged interpopulation synaptic strength  $\langle J_{ij}^{(XY)} \rangle$  at successive stages via an approximate calculation of population-averaged multiplicative synaptic modification  $\langle \widetilde{\Delta J_{ij}^{(XY)}} \rangle$  of Eq. (31), based on the normalized histogram at each stage. These approximate values of  $\langle J_{ij}^{(XY)} \rangle$  have been found to agree well with directly-calculated ones. Consequently, one can understand clearly how microscopic distributions of  $\{\Delta t_{ij}^{(XY)}\}$  contribute to  $\langle J_{ij}^{(XY)} \rangle$ .

Finally, we discuss limitations of our present work and future works. In the present work, we have restricted out attention just to interpopulation (I to E and E to I) STDPs and found emergence of equalization effects. In previous works, intrapopulation (I to I and E to E) STDPs were studied and the Matthew (bipolarization) effects were found to appear [80, 83]. Hence, in future work, it would be interesting to study competitive interplay between the equalization effect in interpopulation synaptic plasticity and the Matthew (bipolarization) effect in intrapopulation synaptic plasticity in networks consisting of both E- and I-populations with both intrapopulation and interpopulation STDPs. In addition to fast sparsely synchronized rhythms (main concern in the present study), asynchronous irregular states (which show stationary global activity and stochastic sparse spike discharges of single cells) also appear in the hippocampal and the neocortical networks. Therefore, as another future work, it would be interesting to study mechanisms (provided by the STDPs in networks with both E- and I-populations) for emergence of asynchronous irregular states which are known to play an important role of information processing [68, 98].

## Acknowledgments

This research was supported by the Basic Science Research Program through the National Research Foundation of Korea (NRF) funded by the Ministry of Education (Grant No. 20162007688).

[1] G. Buzsáki, *Rhythms of the Brain* (Oxford University Press, New York, 2006).

[2] R. D. Traub and M. A. Whittington, *Cortical Oscilla-*



- tions in Health and Diseases (Oxford University Press, New York, 2010).
- [3] D. Khodagholy, N. Gelines, and G. Buzsáki, *Science* **358**, 369 (2017).
- [4] L. Roux, B. Hu, R. Eichler, E. Stark, and G. Buzsáki, *Nat. Neurosci.* **20**, 845 (2017).
- [5] A. Oliva, A. Fernández-Ruiz, G. Buzsáki, and A. Berényi, *Neuron* **91**, 1 (2016).
- [6] J. Taxis, C. A. Anastassiou, K. Diva, and C. Koch, *Neuron* **87**, 590 (2015).
- [7] G. Buzsáki and X.-J. Wang, *Annu. Rev. Neurosci.* **35**, 203 (2012).
- [8] A. B. Saleem, A. D. Lien, M. Krumin, B. Haider, M. R. Rosón, A. Ayaz, K. Reinhold, L. Busse, M. Carandini, and K. D. Harris, *Neuron* **93**, 315 (2017).
- [9] J. Veit, R. Hakim, M. P. Jari, T. J. Sejnowski, and H. Adesnik, *Nat. Neurosci.* **20**, 951 (2017).
- [10] G. Michalareas, J. Vezoli, S. van Pelt, J.-M. Schoffelen, H. Kennedy, and P. Fries, *Neuron* **89**, 384 (2016).
- [11] E. Garcia-Rill, *Waking and the Reticular Activating System in Health and Disease* (Elsevier, London, 2015).
- [12] P. P. Ujma, R. Bódizs, F. Gombos, J. Stintzing, B. N. Konrad, L. Ginzler, A. Steiger, and M. Dresler, *Sci. Rep.* **5**, 17159 (2015).
- [13] H. Miyawaki and K. Diva, *Curr. Biol.* **26**, 893 (2016).
- [14] M. Ploner, C. Sorg, and J. Gross, *Trends Cogn. Sci.* **21**, 100 (2017).
- [15] N. C. Swann, C. de Hemptinne, S. Miodinovic, S. Qasim, S. S. Wang, N. Ziman, J. L. Ostrem, M. San Luciano, N. B. Galifianakis, and P. A. Starr, *J. Neurosci.* **36**, 6445 (2017).
- [16] X.-J. Wang, *Physiol. Rev.* **90**, 1195 (2010).
- [17] J. Csicsvari, H. Hirase, A. Czurko, A. Mamiya, and G. Buzsáki, *J. Neurosci.* **19**, 274 (1999).
- [18] Destexhe and D. Paré, *J. Neurophysiol.* **81**, 1531 (1999).
- [19] J. Fellous and T. J. Sejnowski, *Hippocampus* **10**, 187 (2000).
- [20] A. Hasenstaub, Y. Shu, B. Haider, U. Kraushaar, A. Duque, and D. McCormick, *Neuron* **47**, 423 (2005).
- [21] B. D. Burns and A. C. Webb, *Proc. R. Soc. London Ser. B* **194**, 211 (1976).
- [22] W. R. Softky and C. Koch, *J. Neurosci.* **13**, 334 (1993).
- [23] W. Bair, C. Koch, W. Newsome, and K. Britten, *J. Neurosci.* **14**, 2870 (1994).
- [24] R. J. Douglas, K. A. C. Martin, and D. Whitteridge, *J. Physiol.* **440**, 659 (1991).
- [25] C. van Vreeswijk and H. Sompolinsky, *Science* **274**, 1724 (1996).
- [26] C. van Vreeswijk and H. Sompolinsky, *Neural Comput.* **10**, 1321 (1998).
- [27] N. Brunel, *J. Comput. Neurosci.* **8**, 183 (2000).
- [28] R. Eckhorn, R. Bauer, W. Jordan, M. Brosch, W. Kruse, M. Munk, and H. Reitboeck, *Biol. Cybern.* **60**, 121 (1988).
- [29] C. M. Gray, A. Engel, P. König, and W. Singer, *Eur. J. Neurosci.* **2**, 607 (1990).
- [30] F. H. Eeckman and W. J. Freeman, *Brain Res.* **528**, 238 (1990).
- [31] A. Bragin, G. Jando, Z. Nadasdy, J. Hetke, K. Wise, and G. Buzsáki, *J. Neurosci.* **15**, 47 (1995).
- [32] E. H. Buhl, G. Tamas, and A. Fisahn, *J. Physiol.* **513**, 117 (1998).
- [33] A. Fisahn, F. G. Pike, E. H. Buhl, and O. Paulsen, *Nature* **394**, 186 (1998).
- [34] J. Csicsvari, H. Hirase, A. Czurko, and G. Buzsáki, *Neuron* **21**, 179 (1998).
- [35] A. Destexhe, D. Contreras, and M. Steriade, *J. Neurosci.* **19**, 4595 (1999).
- [36] H. Kashiwadani, Y. F. Sasaki, N. Uchida, and K. Mori, *J. Neurophysiol.* **82**, 1786 (1999).
- [37] P. Fries, J. H. Reynolds, A. E. Rorie, and R. Desimone, *Science* **291**, 1560 (2001).
- [38] N. K. Logothetis, J. Pauls, M. A. Augath, T. Trinath, and A. Oeltermann, *Nature* **412**, 150 (2001).
- [39] B. Pesaran, J. S. Pezaris, M. Sahani, P. P. Mitra, and R. A. Andersen, *Nat. Neurosci.* **5**, 805 (2002).
- [40] J. Csicsvari, B. Jamieson, K. Wise, and G. Buzsáki, *Neuron* **37**, 311 (2003).
- [41] A. Compte, R. Reig, V. F. Descalzo, M. A. Harvey, G. D. Puccini, and M. V. Sanchez-Vives, *J. Neurosci.* **28**, 13828 (2008).
- [42] D. Rojas-Libano and L. M. Kay, *Cogn. Neurodyn.* **2**, 179 (2008).
- [43] L. L. Colgin, T. Denninger, M. Fyhn, T. Hafting, T. Bonnevie, O. Jensen, M. B. Moser, and E. I. Moser, *Nature* **462**, 353 (2009).
- [44] N. Brunel and V. Hakim, *Neural Comput.* **11**, 1621 (1999).
- [45] N. Brunel and X.-J. Wang, *J. Neurophysiol.* **90**, 415 (2003).
- [46] C. Geisler, N. Brunel, and X.-J. Wang, *J. Neurophysiol.* **94**, 4344 (2005).
- [47] N. Brunel and D. Hansel, *Neural Comput.* **18**, 1066 (2006).
- [48] N. Brunel and V. Hakim, *Chaos* **18**, 015113 (2008).
- [49] O. Sporns, *Networks of the Brain* (MIT Press, Cambridge, 2011).
- [50] D.B. Chklovskii, B.W. Mel, and K. Svoboda, *Nature* **431**, 782 (2004).
- [51] S. Song, P.J. Sjöström, M. Reigl, S. Nelson, and D. B. Chklovskii, *PLoS Biol.* **3**, e68 (2005).
- [52] O. Sporns and C.J. Honey, *Proc. Natl. Acad. Sci. USA* **103**, 19219 (2006).
- [53] P. Larimer and B.W. Strowbridge, *J. Neurosci.* **28**, 12212 (2008).
- [54] E. Bullmore and O. Sporns, *Nat. Rev. Neurosci.* **10**, 186 (2009).
- [55] O. Sporns, G. Tononi, and G.M. Edelman, *Cereb. Cortex* **10**, 127 (2000).
- [56] D. S. Bassett and E. Bullmore, *The Neuroscientist* **12**, 512 (2006).
- [57] S.-Y. Kim and W. Lim, *Physica A* **421**, 109 (2015).
- [58] S.-Y. Kim and W. Lim, *Phys. Rev. E* **92**, 022717 (2015).
- [59] S.-Y. Kim and W. Lim, *Phys. Rev. E* **92**, 052716 (2015).
- [60] D. O. Hebb, *The Organization of Behavior; A Neuropsychological Theory* (Wiley & Sons, New York, 1949).
- [61] J. Kornhuber, *Conditional Reflexes and Neuron Organization* (Cambridge University Press, Cambridge, 1948).
- [62] C. J. Shatz, *Sci. Am.* **267**, 60 (1992).
- [63] G. S. Stent, *Proc. Natl. Acad. Sci. USA* **70**, 997 (1973).
- [64] C. von der Malsburg, *Kybernetik* **14**, 85 (1973).
- [65] T. J. Sejnowski, *J. Math. Biol.* **4**, 303 (1977).
- [66] E. L. Bienenstock, L. N. Cooper, and P. W. Munro, *J. Neurosci.* **2**, 32 (1982).
- [67] L. F. Abbott and S. B. Nelson, *Nat. Neurosci.* **3**, 1178 (2000).
- [68] S. Song, K. D. Miller, and L. F. Abbott, *Nat. Neurosci.* **3**, 919 (2000).



- [69] G.-Q. Bi and M.-M. Poo, *Annu. Rev. Neurosci.* **24**, 139 (2001).
- [70] A. Kepecs, M. C. W. van Rossum, S. Song, and J. Tegner, *Biol. Cybern.* **87**, 446 (2002).
- [71] Y. Dan and M.-M. Poo, *Neuron* **44**, 23 (2004).
- [72] Y. Dan and M.-M. Poo, *Physiol. Rev.* **86**, 1033 (2006).
- [73] N. Caporale and Y. Dan, *Annu. Rev. Neurosci.* **31**, 25 (2008).
- [74] D. E. Feldman, *Neuron* **75**, 556 (2012).
- [75] H. Markram, W. Gerstner, and P. J. Sjöström, *Front. Synaptic Neurosci.* **4**, 2 (2012).
- [76] O. V. Popovych and P. A. Tass, *Front. Hum. Neurosci.* **6**, 58 (2012).
- [77] O. V. Popovych, S. Yanchuk, and P. A. Tass, *Sci. Rep.* **3**, 2926 (2013).
- [78] R. R. Borges, F. S. Borges, A. M. Batista, E. L. Lameu, R. L. Viana, K. C. Iarosz, I. L. Caldas, M. A. F. Sanjuán, *Commun. Nonlinear Sci. Numer. Simulat.* **34**, 12 (2016).
- [79] R. R. Borges, F. S. Borges, E. L. Lameu, A. M. Batista, K. C. Iarosz, I. L. Caldas, C. G. Antonopoulos, and M. S. Batista, *Neural Netw.* **88**, 58 (2017).
- [80] S.-Y. Kim and W. Lim, *Neural Netw.* **97**, 92 (2018).
- [81] S.-Y. Kim and W. Lim, *Cogn. Neurodyn.* **12**, 315 (2018).
- [82] S.-Y. Kim and W. Lim, *Cogn. Neurodyn.* **13**, 53 (2019).
- [83] S.-Y. Kim and W. Lim, *Neural Netw.* **106**, 50 (2018).
- [84] H. Markram, J. Lübke, M. Frotscher, and B. Sakmann, *Science* **275**, 213 (1997).
- [85] L. I. Zhang, H. W. Tao, C. E. Holt, W. A. Harris, and M. Poo, *Nature* **395**, 37 (1998).
- [86] G.-Q. Bi and M.-M. Poo, *J. Neurosci.* **18**, 10464 (1998).
- [87] D. Debanne, B. H. Gähwiler, and S. M. Thompson, *J. Physiol.* **507.1**, 237 (1998).
- [88] V. Egger, D. Feldmeyer, and B. Sakmann, *Nat. Neurosci.* **2**, 1098 (1999).
- [89] T. Tzounopoulos, Y. Kim, D. Oertel, and L. O. Trussell, *Nat. Neurosci.* **7**, 719 (2004).
- [90] G. M. Wittenberg and S. S. Wang, *J. Neurosci.* **26**, 6610 (2006).
- [91] T. P. Vogels, R. C. Froemke, N. Doyon, M. Gilson, J. S. Haas, R. Liu, A. Maffei, P. Miller, C. J. Wierenga, M. A. Woodin, F. Zenke and H. Sprekeler, *Front. Neural Circuits* **7**, 119 (2013).
- [92] D. M. Kullmann, A. W. Moreau, Y. Bakiri, and E. Nicholson, *Neuron* **75**, 951 (2012).
- [93] K. P. Lamsa, D. M. Kullmann, and M. A. Woodin, *Front. Synaptic Neurosci.* **2**, 8 (2010).
- [94] J.-L. Gaiarsa, O. Caillard, and Y. Ben-Ari, *Trends Neurosci.* **25**, 564 (2002).
- [95] R. C. Froemke, *Annu. Rev. Neurosci.* **38**, 195 (2015).
- [96] K. Deisseroth, G. Feng, A. K. Majewska, G. Miesenböck, A. Ting, and M. J. Schnitzer, *J. Neurosci.* **26**, 10380 (2006).
- [97] J. A. Cardin, *J. Physiol. (Paris)* **106**, 104 (2012).
- [98] T. P. Vogels, H. Sprekeler, F. Zenke, C. Clopath, and W. Gerstner, *Science* **334**, 1569 (2011).
- [99] P. E. Castillo, C. Q. Chiu, and R. C. Carroll, *Curr. Opin. Neurobiol.* **21**, 328 (2011).
- [100] S. S. Talathi, D. U. Hwang, and W. L. Ditto, *J. Comput. Neurosci.* **25**, 262 (2008).
- [101] R. R. Borgers, F. S. Borgers, E. E. Lameu, P. R. Protachevich, K. C. Iarosz, I. L. Caldas, R. L. Viana, E. E. L. Macau, M. S. Baptista, C. Grebogi, A. M. Baptista, *Braz. J. Phys.* **47**, 678 (2017).
- [102] J. Haas, T. Nowotny, H. Abarbanel, B. Zavala, and C. Landisman, *J. Neurophysiol.* **96**, 3305 (2006).
- [103] M. A. Woodin, K. Ganguly, and M.-M. Poo, *Neuron* **39**, 807 (2003).
- [104] C. Soto-Trevino, K. A. Thoroughman, E. Marder, and L. F. Abbott, *Nat. Neurosci.* **4**, 297 (2001).
- [105] G. Buzsáki, C. Geisler, D.A. Henze and X.-J. Wang, *Trends Neurosci.* **27**, 186 (2004).
- [106] D.J. Watts and S.H. Strogatz, *Nature* **393**, 440 (1998).
- [107] S. H. Strogatz, *Nature* **410**, 268 (2001).
- [108] D. J. Watts, *Small Worlds: The Dynamics of Networks Between Order and Randomness* (Princeton University Press, 2003).
- [109] S. Milgram, *Psychol. Today* **1**, 61 (1967).
- [110] J. Guare, *Six Degrees of Separation: A Play* (Random House, New York, 1990).
- [111] E. M. Izhikevich, *IEEE Trans. Neural Netw.* **14**, 1569 (2003).
- [112] E. M. Izhikevich, *IEEE Trans. Neural Netw.* **15**, 1063 (2004).
- [113] E. M. Izhikevich, *Dynamical Systems in Neuroscience* (MIT Press, Cambridge, 2007).
- [114] E. M. Izhikevich, *Pil. Trans. R. Soc. A* **368**, 5061 (2010).
- [115] A. L. Hodgkin, *J. Physiol.* **107**, 165 (1948).
- [116] E. M. Izhikevich, *Int. J. Bifurcat. Chaos* **10**, 1171 (2000).
- [117] J. Rubin, D. D. Lee, and H. Sompolinsky, *Phys. Rev. Lett.* **86**, 364 (2001).
- [118] A. Morrison, A. Aertsen, and M. Diesmann, *Neural Comput.* **19**, 1437 (2007).
- [119] J. S. Haas, T. Nowotny, and H. D. I. Abarbanel, *J. Neurophysiol.* **96**, 3305 (2006).
- [120] S. S. Talathi, D. U. Hwang, and W. L. Ditto, *J. Comput. Neurosci.* **25**, 262 (2008).
- [121] C. C. Bell, V. Z. Han, Y. Sugawara, and K. Grant, *Nature* **387**, 278 (1997).
- [122] N. Caporale and Y. Dan, *Ann. Rev. Neurosci.* **31**, 25 (2008).
- [123] M. San Miguel and R. Toral, in *Instabilities and Nonequilibrium Structures VI*, edited by J. Martinez, R. Tiemann, and E. Tirapegui (Kluwer Academic Publisher, Dordrecht, 2000), p. 35.
- [124] S.-Y. Kim and W. Lim, *J. Neurosci. Methods* **226**, 161 (2014).
- [125] H. Shimazaki and S. Shinomoto, *J. Comput. Neurosci.* **29**, 171 (2010).
- [126] W. Lim and S.-Y. Kim, *J. Korean Phys. Soc.* **52**, 1913 (2008).
- [127] D. Golomb and J. Rinzel, *Physica D* **72**, 259 (1994).
- [128] A. Longtin, *Nuovo Cimento D* **17**, 835 (1995).
- [129] A. Longtin, in *Stochastic Dynamics and Pattern Formation in Biological and Complex Systems*, edited by S. Kim, K. J. Lee, and W. Sung (AIP, New York, 2000), pp. 219-239.
- [130] W. Lim and S.-Y. Kim, *J. Comput. Neurosci.* **31**, 667 (2011).
- [131] D.-G. Hong, S.-Y. Kim, and W. Lim, *J. Korean Phys. Soc.* **59**, 2840 (2011).
- [132] S.-Y. Kim and W. Lim, *J. Korean Phys. Soc.* **63**, 104 (2013).
- [133] P. Dayan and L. F. Abbott, *Theoretical Neuroscience: Computational and Mathematical Modeling of Neural Systems* (MIT press, Cambridge, 2001) Sec. 1.4.
- [134] W. Gerstner, W. M. Kistler, R. Naud, and L. Paninski,

*Neuronal Dynamics: From Single Neurons to Networks and Models of Cognition* (Coambridge University Press, Cambridge, 2014) Sec. 7.3.

[135] K. Pearson, Proc. Royal Soc. Lond. **58**, 240 (1895).
